# Supplementary material for: Identifying patient concerns during consultations in tertiary burns services: development of the Adult Burns Patient Concerns Inventory
Source: PubMed Central journal article supplement — BMJ Open. 2019 Dec 30;9(12):e032785. doi: 10.1136/bmjopen-2019-032785 (PMC6955499; doi:10.1136/bmjopen-2019-032785), 2019-12-30
Supplement: bmjopen-2019-032785.draft_revisions.pdf [file bmjopen-2019-032785.draft_revisions.pdf]

# BMJ Open

BMJ Open is committed to open peer review. As part of this commitment we make the peer review history of every article we publish publicly available.

When an article is published we post the peer reviewers' comments and the authors' responses online. We also post the versions of the paper that were used during peer review. These are the versions that the peer review comments apply to.

The versions of the paper that follow are the versions that were submitted during the peer review process. They are not the versions of record or the final published versions. They should not be cited or distributed as the published version of this manuscript.

BMJ Open is an open access journal and the full, final, typeset and author-corrected version of record of the manuscript is available on our site with no access controls, subscription charges or pay-per-view fees (<http://bmjopen.bmj.com>).

If you have any questions on BMJ Open's open peer review process please email [info.bmjopen@bmj.com](mailto:info.bmjopen@bmj.com)

# BMJ Open

## Development of the Adult Burns Patients Concerns Inventory

|                               |                                                                                                                                                                                                                                                                                                                                                                                                                                                                                                                                                                                                                                                                                                                                                                                                                                                                                                                        |
|-------------------------------|------------------------------------------------------------------------------------------------------------------------------------------------------------------------------------------------------------------------------------------------------------------------------------------------------------------------------------------------------------------------------------------------------------------------------------------------------------------------------------------------------------------------------------------------------------------------------------------------------------------------------------------------------------------------------------------------------------------------------------------------------------------------------------------------------------------------------------------------------------------------------------------------------------------------|
| Journal:                      | <i>BMJ Open</i>                                                                                                                                                                                                                                                                                                                                                                                                                                                                                                                                                                                                                                                                                                                                                                                                                                                                                                        |
| Manuscript ID                 | bmjopen-2019-032785                                                                                                                                                                                                                                                                                                                                                                                                                                                                                                                                                                                                                                                                                                                                                                                                                                                                                                    |
| Article Type:                 | Research                                                                                                                                                                                                                                                                                                                                                                                                                                                                                                                                                                                                                                                                                                                                                                                                                                                                                                               |
| Date Submitted by the Author: | 12-Jul-2019                                                                                                                                                                                                                                                                                                                                                                                                                                                                                                                                                                                                                                                                                                                                                                                                                                                                                                            |
| Complete List of Authors:     | Gibson, John; Edge Hill University, Postgraduate Medical Institute; Abertawe Bro Morgannwg University Health Board, The Welsh Centre for Burns & Plastic Surgery<br>Yarrow, Jeremy; Abertawe Bro Morgannwg University Health Board, The Welsh Centre for Burns & Plastic Surgery<br>Brown, Liz; Abertawe Bro Morgannwg University Health Board, The Welsh Centre for Burns & Plastic Surgery<br>Evans, Janine; Abertawe Bro Morgannwg University Health Board, The Welsh Centre for Burns & Plastic Surgery<br>Rogers, Simon; Aintree University Hospitals NHS Foundation Trust; Edge Hill College, Postgraduate Medical Institute<br>Spencer, Sally; Edge Hill University, Postgraduate Medical Institute (PGMI), Faculty of Health & Social Care<br>Shokrollahi, Kayvan; Edge Hill University, Postgraduate Medical Institute; Saint Helen's and Knowsley Teaching Hospitals NHS Trust, Mersey Regional Burns Centre |
| Keywords:                     | Burns, Patient Concerns Inventory, Health Related Quality of Life, Patient Centred Care                                                                                                                                                                                                                                                                                                                                                                                                                                                                                                                                                                                                                                                                                                                                                                                                                                |
|                               |                                                                                                                                                                                                                                                                                                                                                                                                                                                                                                                                                                                                                                                                                                                                                                                                                                                                                                                        |

SCHOLARONE™  
Manuscripts

## **Development of the Adult Burns Patients Concerns Inventory**

John A. G. Gibson<sup>1,2\*</sup>, Jeremy Yarrow<sup>2</sup>, Liz Brown<sup>2</sup>, Janine Evans<sup>2</sup>, Simon N. Rogers<sup>1,3</sup>,  
Sally Spencer<sup>1</sup>, Kayvan Shokrollahi<sup>1,4</sup>

1. Postgraduate Medical Institute, Edge Hill University, Ormskirk, UK
2. The Welsh Centre for Burns & Plastic Surgery, Morriston Hospital, Swansea, UK
3. Merseyside Regional Maxillofacial Unit, University Hospital Aintree, Liverpool, UK
4. Mersey Regional Burns Centre, Whiston Hospital, Merseyside, UK

\*Corresponding Author

Email:johnnaggibson@hotmail.com

Data Availability Statement: Anonymised qualitative interview data are available for a period of 10 years from the first author.

## Abstract

### Objectives

Identifying the issues and concerns that matter most to burns survivors can be challenging. For a number of reasons, but mainly relating to patient empowerment, some of the most pressing concerns patients may have during a clinical encounter may not naturally be the focal point of that encounter. The Patient Concerns Inventory (PCI) is a tried and tested concept initially developed in the field of head and neck cancer that empowers patients during a clinical encounter through provision of a list of prompts that allows patients to self-report concerns prior to consultation. The aim of this study was to develop a Patients Concerns Inventory (PCI) for adult burns patients.

### Design

Content for the PCI was generated from three sources: Burns Health Related Quality of Life (HRQoL) tools, thematic analysis of one-to-one interviews with adult burns patients and Multi-Disciplinary Team (MDT) members. Content was refined using a Delphi consensus technique, with patients and staff members, using SurveyMonkey.

### Setting

Within outpatient secondary care.

### Participants

Twelve adult burn patients and MDT members from two regional burns centres.

### Results

A total of 111 individual items were generated from the three sources. The Delphi process refined the total number of items to 58. The main emergent domains were physical and functional well-being (18 items), psychological, emotional and spiritual well-being (22 items), social care and social well-being (7 items) and treatment-related concerns (11 items).

### Conclusions

1  
2  
3 The Adult, Burns-Specific Patient Concerns Inventory (PCI-B (adult)) is a 58-item, holistic  
4 prompt list, designed to be used in the outpatient clinic. It offers a new tool in burn care to  
5 improve communication between healthcare professionals and patients, empowering them to  
6 identify their most pressing concerns and hence deliver a more focussed and targeted patient-  
7 centred clinical encounter.  
8  
9

10  
11  
12 **Keywords:** Burns; Health-Related Quality of Life, Holistic prompt list, Patient Concerns  
13 Inventory; PCI; patient-centred care.  
14  
15

### 16 17 **Strengths and Limitations of this study** 18

- 19
- 20 • The PCI offers a new tool in burn care to improve communication between healthcare
- 21 professionals and patients
- 22 • The PCI – B (Adult) has been developed in accordance with international standards
- 23 on Health Related Quality of Life tool development.
- 24 • Content within the PCI may not capture concerns unique to patients from other
- 25 cultures, age groups, or those with other types of burns.
- 26 • Further work is required to determine the efficacy of the tool in the clinical setting.  
27  
28  
29  
30  
31  
32  
33  
34  
35  
36  
37  
38  
39  
40  
41  
42  
43  
44  
45  
46  
47  
48  
49  
50  
51  
52  
53  
54  
55  
56  
57  
58  
59  
60

## Introduction

Globally, burns are the fourth most common form of trauma after road traffic accidents, falls and interpersonal violence<sup>1</sup>. In 2008, the World Health Organisation (WHO) estimated that 195,000 people died from fire-related injuries, a decrease of almost 40% in relation to 2004<sup>1</sup>. The decline in mortality has been attributed to improved knowledge of the pathophysiological response to injury and progress in intensive care, nutrition, surgical techniques and infection control<sup>3</sup>. Consequently, more patients are surviving major burn injuries and require long-term support and rehabilitation.

The need for a holistic approach to burn care is essential if the many issues that a patient may encounter such as physical symptoms, psychological issues and reduced physical function are to be fully addressed<sup>4,5</sup>. In the time-restricted outpatient setting, identifying the issues and concerns that matter most to patients can be challenging. Furthermore, it is often difficult to identify patients that 'suffer in silence' and some concerns, for example the impact of burn injuries on sexual relationships, may be potentially embarrassing or difficult for both the patient and health care professional to discuss unless there is some mechanism or prompt to facilitate this<sup>6,7</sup>. The stress and anxiety associated with attending clinic appointments, often involving extensive journeys, may also cause patients to forget to raise important issues during the consultation.

An open, communicative relationship helps patients understand their health condition, improving satisfaction, improving health outcomes and reducing patient stress<sup>8,9</sup>. Improvements in patient-professional communication have been most notable in oncology where the concept of Holistic Needs Assessment (HNA) has become an integral aspect of care<sup>10</sup>. Rogers et al. developed and piloted a Patient Concerns Inventory (PCI) to assess the needs of patient with head and neck cancer<sup>11</sup>. The PCI, is a prompt list of concerns completed by patients prior to consultation and enables the clinician to focus the discussion around the individual's needs. The PCI has since been validated in rheumatology<sup>12</sup>, neuro-oncology<sup>13</sup> and breast cancer<sup>14</sup> and is associated with greater patient satisfaction, and service efficiency<sup>11,13,15-17</sup>.

The aim of this study was to develop a PCI for adult burns patients.

## Methods

The study comprised three distinct stages. Firstly, content for the PCI was generated from three sources: burns-specific health related quality of life (HRQoL) tools, one to one interviews with burns patients and focus groups with multi-disciplinary care teams (MDT) from two regional burns centres. Following this stage, items were refined using a Delphi process. The final stage of PCI development was to group items into discrete domains.

The need for both patient and professional involvement in the development of patient-focused tools is extensively documented within the literature. It is argued that such an approach is essential to ensure the tool adequately reflects the needs of the target population<sup>18-20</sup> and this approach was therefore adopted from the outset.

### 1. CONTENT GENERATION

#### a. HRQoL Tools

A systematic search of MEDLINE, the Cochrane library, Embase and PsycInfo was undertaken in November 2017 to identify HRQoL tools psychometrically validated for an adult burn population ( $\geq 18$ ). Grey literature was searched using Google Scholar and OpenGrey.

Relevant items were extracted from the HRQoL measures by JAGG and independently verified by SS.

#### b. One-to-One Patient Interviews

Participants were recruited from two regional burn centres in the UK; The Welsh Centre for Burns & Plastic Surgery, Swansea and The Mersey Burns Centre, Liverpool, using the following eligibility criteria: Participants aged 18 or above, with a burn injury and actively receiving treatment. Participants unable to speak English or unable to provide informed consent were excluded.

A purposive sampling strategy was used to select participants representative of the wider burns population based on: age (18-30, 31-50, 50-65, >65), gender, mechanism of burn (scald, flame, contact, electrical and chemical), severity of burn (0-15% TBSA, >15%TBSA) and time following injury (<6 months since injury, 6 months -1 year, >1 year).

1  
2  
3 Eligible participants were identified by clinic staff and provided with participant information  
4 sheets describing the study. Those willing to participate contacted JAGG who arranged a  
5 suitable time and date for the interview. Written informed consent was provided by all  
6 participants prior to interviews, which were conducted in a confidential space in the burns  
7 centre using a semi-structured interview format. Participants were asked to describe concerns  
8 and issues encountered during the course of their recovery; the initial acute inpatient  
9 treatment (where applicable), outpatient treatment and their concerns for the future.  
10  
11

12  
13 Interviews were digitally audio-recorded and transcribed verbatim (JAGG). Data were  
14 analysed using a six step inductive thematic approach<sup>21</sup> supported by NVivo v12 software.  
15 Data collection and analysis were concurrent to enable determination of data saturation;  
16 where additional interviews did not yield new information<sup>22</sup>. Concerns described by  
17 participants were assigned unique codes and those deemed irrelevant to the PCI were  
18 excluded. The codes that remained were the initial list of patient concerns. Coding was  
19 performed by JAGG and verified by SS.  
20  
21  
22  
23  
24  
25  
26  
27  
28

### 29 c. Multi-Disciplinary Team (MDT)

30  
31 Staff from two regional burns centres provided content from the perspective of healthcare  
32 professionals. Informed consent was obtained from all staff participants. Items harvested in  
33 stage a) were reviewed by members of the MDT who then added additional items. Concerns  
34 devised from patients in stage b) were not shared with the MDT to enable comparison  
35 between groups.  
36  
37  
38  
39  
40

## 41 2. CONTENT REFINEMENT

42  
43 Incorporating every concern identified would have been extensive, placing a high burden on  
44 patients and staff in terms of completion time and analysis, therefore not feasible in the  
45 confines of an outpatient clinic<sup>20,22</sup>. Content reduction was therefore necessary at this stage  
46 to remove similar items and to achieve consensus on the final item list. Development of other  
47 versions of the PCI have confirmed that a checklist of 50-100 items is feasible in the  
48 outpatient setting<sup>11-13</sup>. An item bank was compiled from the three aforementioned sources;  
49 HRQoL tools, patient interviews and the MDT. An online Delphi process using  
50 SurveyMonkey software<sup>23</sup> was used to reduce and refine the item bank. To maintain  
51 stakeholder validity, both healthcare professionals and patients who participated in content  
52 generation were invited to take part. Participants were asked to select items for inclusion in  
53  
54  
55  
56  
57  
58  
59  
60



1  
2  
3 the final PCI and to add additional items considered missing. Items with less than a 60%  
4 selection rate were excluded from the final PCI. The survey was repeated and items with a  
5 60% agreement were retained in the final list of concerns. This level of consensus has been  
6 shown to be effective in previous versions of the PCI<sup>11-13</sup>.  
7  
8  
9

### 10 11 3. ITEM DOMAINS 12

13 The purpose of this stage was to group similar aspects of health together to help patients  
14 focus on one topic at a time when completing the PCI. The final list of concerns were  
15 allocated to one of the four following domains:  
16  
17  
18

- 19 1. Physical and functional well-being.
  - 20 2. Psychological, spiritual and emotional well-being.
  - 21 3. Social care and social well-being.
  - 22 4. Treatment related concerns.
- 23  
24  
25  
26

27 These four domains feature on other versions of the PCI and are consistent with the domains  
28 of other general and disease specific HRQoL measures<sup>24</sup>. They were therefore deemed  
29 appropriate for the adult burns PCI. A further Delphi process, using SurveyMonkey, was  
30 used to allocate items to domains based on 60% consensus from MDT staff.  
31  
32  
33  
34

### 35 PATIENT AND PUBLIC INVOLVEMENT 36

37 A patient and public involvement session was hosted by the Katie Piper Foundation. This  
38 informal focus group highlighted the disparity between issues considered important by health  
39 professionals managing care and patients receiving care. Patient feedback was used to design  
40 the study and aid with patient recruitment.  
41  
42  
43  
44

### 45 ETHICAL APPROVAL 46

47 The study was approved by the Health Research Authority North West - Greater Manchester  
48 Central Research Ethics Committee 17/NW/0297 IRAS ID 214597.  
49  
50  
51  
52  
53  
54  
55  
56  
57  
58  
59  
60

## RESULTS

A diagram displaying an overview of the three stages of tool development alongside the number of concerns generated is shown in Figure 1.

### CONTENT GENERATION

#### a. HRQoL tools

The search identified seven HRQoL tools. Five were disease specific; the Burn Specific Health Scale-Brief (BSHS-B)<sup>25</sup>, The Young Adult Burn Outcome Questionnaire (YABOQ)<sup>26</sup>, Burn Specific Pain Anxiety Scale (BSPSAS)<sup>27</sup>, The Patient Observer Scar Assessment Scale (POSAS)<sup>28</sup>, The Satisfaction With Appearance Scale (SWAP)<sup>29</sup>. Two were generic; EQ 5D<sup>30</sup> and SF 36<sup>31</sup>. Forty-nine items were harvested from the seven measures (Appendix 1).

#### b. One to One Interviews

Twelve face-to-face interviews lasting for average of 46 minutes (20-85 mins) were conducted between August and September 2018. Population demographics are shown in Table 1.

**Table 1 Patient demographics**

|                                  |               |
|----------------------------------|---------------|
| Patients, N                      | 12            |
| Age (yrs), mean (range)          | 47.9 (28-60)  |
| Male, N                          | 7             |
| Female, N                        | 5             |
| White British                    | 12            |
| Years since injury, mean (range) | 13.3 (.08-53) |
| Percentage TBSA, mean (range)    | 24 (1 -75)    |
| Contact burn, N                  | 2             |
| Chemical burn, N                 | 1             |
| Electrical burn, N               | 1             |
| Flame burn, N                    | 5             |
| Flash burn, N                    | 2             |
| Scald burn, N                    | 1             |

TBSA: Total Body Surface Area

1  
2  
3 A total of 97 individual codes were generated from the 12 interviews. Following removal of  
4 forty duplicate and similar items, 57 concerns remained. The themes are outlined below.  
5  
6

### 7 **Items Generated**

#### 8 **Physical concerns relating to wounds and Scars**

9  
10 All twelve participants expressed concerns about potential scarring, though only nine had  
11 developed scars. When specifically probed about the physical appearance of scars, patients  
12 did not focus on specific features, such as the colour or texture; they were more concerned  
13 with overall appearance and the impact of scarring on other aspects of physical health and  
14 well-being, such as mobility. The following concerns were identified in relation to wounds  
15 and scars.  
16  
17  
18  
19  
20  
21  
22

23 Pain was an overriding concern for all participants, at multiple time points of their recovery.  
24 *“I don’t remember what normal felt like...it sounds really stupid to say but a year has gone  
25 and I don’t know what it’s like to not be in pain.”* (Participant 8)  
26  
27  
28  
29

30 Nerve (neuropathic) pain was described separately by three patients and therefore considered  
31 a separate concern.  
32  
33  
34

35 Mobility was a concern raised by eight participants, such as an inability to perform routine  
36 day to day activities, arising from movement restriction, pain or skin sensitivity.  
37  
38

39 *“The initial part from laying down to sitting up to getting off the bed was really hard across  
40 the back [Patient had burn wounds to the back]. It was so painful, it was really hard.”*  
41  
42

43 (Participant 11)

44 Hand function was a concern expressed by all six participants that had injuries to the hand  
45 and upper limb. For one builder this issue severely limited his ability to work:  
46  
47

48 *“I still can’t grip with this one, [Lifts dominant left hand] that’s my grip [attempts to grip the  
49 investigators pen with limited success]. But it’s like stupid things, like I can’t hold a nail. I  
50 hold a nail and me arm shakes. I can’t hold a screw.”* (Participant 8)  
51  
52  
53  
54

55 Skin strength was a concern for five participants. For one participant, a self-employed  
56 mechanic, it had a substantial impact on his work:  
57  
58  
59  
60

1  
2  
3  
4  
5  
6  
7  
8  
9  
10  
11  
12  
13  
14  
15  
16  
17  
18  
19  
20  
21  
22  
23  
24  
25  
26  
27  
28  
29  
30  
31  
32  
33  
34  
35  
36  
37  
38  
39  
40  
41  
42  
43  
44  
45  
46  
47  
48  
49  
50  
51  
52  
53  
54  
55  
56  
57  
58  
59  
60

*“I’ve noticed a few times now that when I cut my hands on something, when you’re working, it opens the skin up quite easily. Whereas before it may have caused a scratch, now it’s a big problem.”*

(Participant 2)

Scar tightness was a concern for all nine participants that had scarring. For six patients this was related to mobility limitation and captured above, but for three participants, scar tightness was associated with discomfort rather mobility issues.

*“The groin is quite tight. It’s like I’ve got a pair of knickers on that are four sizes too small.”*

(Participant 7)

Scar tightness was also a concern for patients with abdominal scarring during pregnancy.

Weight gain was a concern for four patients, arising from reduced mobility and excessive calorie intake. The excess weight increased participant’s dissatisfaction with their appearance and increased scar tightness resulting in additional discomfort.

Skin sensitivity was a concern for most of the interviewees, including itching during wound healing (four participants), scar sensitivity (six participants) and heat sensitivity (five participants).

*“When I got the slightest touch, I would just have to move.”*

(Participant 6)

### **Physical concerns not related to scars**

Concerns about other aspects of physical function included, sleep deprivation (seven participants), loss of appetite (four participants) and fatigue during the initial recovery stage (six participants), and lack of energy (four participants).

*“It’s a different tired to when you’re not getting sleep.”*

(Participant 2)

### **Body image**

Physical appearance and body image was an important concern for all participants.

*“I still want nice normal skin. I want to look in a mirror and not see this burned flesh that stays with me all the time.”*

(Participant 7)

1  
2  
3 As a direct consequence of scarring, nine participants described anxiety associated with  
4 acceptance by society. Five participants described a lack of confidence and low self esteem  
5 following the injury.  
6  
7

8 *“I just felt like nothing. I’m now very happy with my life but it [the injury] made me feel ugly*  
9 *and worthless.”* (Participant 7)  
10  
11

12  
13 Comments from others were of great concern throughout the recovery process for all twelve  
14 participants. Three patients reported bullying and another described discrimination in the  
15 workplace owing to scarring.  
16  
17

18 *“If I were to walk into a pub with you I would be the topic of conversation because I’m*  
19 *different. I see that and I feel that.”* (Participant 5)  
20  
21  
22

### 23 24 **Coping Strategies**

25  
26 Coping with the psychological sequelae of the injury was a concern for seven of the  
27 participants. Coping mechanisms such as increased alcohol consumption and smoking were  
28 concerns for two participants and avoidance of reminders were described by seven  
29 participants. For some, this impacted upon daily functioning.  
30  
31  
32

33  
34 *“The stove is still a no go for me. I’m back in the kitchen doing butties and things like that*  
35 *but putting things on the stove I’m still a bit shaky.”* (Participant 6)  
36  
37

38 Fear for the future and anger were other negative coping strategies described by participants  
39

40 *“I get angry now when I talk about it because I used to get a bit sad and a bit feeling down*  
41 *but I can’t now, I just get.... It’s like a rage that comes over me. No, I can’t work it out.”*  
42  
43

44 (Participant 4)  
45

### 46 **Mental health**

47  
48 Anxiety was encountered by five participants, causing considerable repercussions.  
49

50  
51 *“I’m suffering a lot from panic attacks, anxiety, really, really badly. There’s mornings now*  
52 *where I have to really argue with myself to actually wake up and go to work.”*  
53  
54

55 (Participant 8)  
56

57 Depression was experienced by five participants and low mood by eight.  
58

59 *“It would change my mood. It would bring me down and I’m not a person that’s down”*  
60

(Participant 2)

Participants described low mood to avoid the perceived stigma associated with mental health conditions. One participant described the impact of appropriate terminology:

*“If you say that people need help with their well-being and their full recovery, which means physical and mental in every sense, emotional and so on, that is better than implying that people must have mental health problems because they’ve been through a trauma. That would draw in a wider set of people who [wanted or needed] some kind of mental health support.”*

(Participant 9)

### **PTSD symptomology**

Seven participants suffered flashbacks of the injury event.

*“I would have the odd flashback. I try not to think about it ... as they were really bad.”*

(Participant 2)

Dependence on others and guilt were described by seven and six patients respectively. Guilt was experienced mostly by patients who, witnessed other survivors with more severe injuries.

*“I felt ashamed and embarrassed and horrible and dirty and guilty because I’m alive really.”*

(Participant 7)

Six participants described broad concerns and issues relating to their psychological and emotional well-being that could not be defined by any of the above themes. The term psychological trauma was used as the code. One patient who was assaulted, developed depression and PTSD:

*“I’ve had to stop thinking about it, because the more I was trying to think about why they did it, I was getting nowhere, ... but when I look at my arm sometimes, [the scar] it just triggers it again.”*

(Participant 8)

### **Social Well-Being**

All twelve participants were concerned about the impact of the injury on their intimate, personal and social relationships. Four participants raised specific concerns about intimacy.

*“Intimacy is awkward, you know... we still have a loving relationship but it’s not what it was before the accident. It was quite hard to come to terms with.”*

(Participant 4)

All participants were concerned about the impact of their injury on family members. Concerns related to the psychological trauma experienced by members of the family who witnessed the trauma:

*“My son was screaming, I mean he must have seen me on fire.”* (Participant 1)

Both physical and psychological aspects of the injury prevented six participants from continuing their regular hobbies and interests. Returning to work and education following the injury were concerns raised by ten participants. The financial implications of the injury were far reaching and perceived as an issue for six patients. For one participant, it was perceived as the most difficult aspect of the injury.

*“Financial that’s been.... If I’m honest with you, I’ve found that worse than the pain.”*

(Participant 8)

### **Treatment Related Concerns**

All twelve participants expressed concerns about good communication with the clinical team in relation to their treatment. Communication was perceived as poor when patients did not feel that their needs were identified or addressed, leading to significant distress.

*“Some went “don’t you worry we’re doing what we can” kind of thing. So what are you doing? What is the plan? I kind of got the impression that had we not pushed, they wouldn’t have explained.”* (Participant 9)

On the other hand, excellent communication inspired greater confidence in the competence of healthcare professionals. In instances where treatment options were not available for particular issues, patients appreciated honesty.

*As an adult now, he’s helped me understand. It’s like he can do little bits to tidy me up. I think that I don’t want to accept it. He can’t get rid of it all but he can make me better. So I feel valued as a person not like the other consultants. It can do a lot of damage. It really can.*

(Participant 7)

In the early stages of recovery, patients had numerous concerns relating to wound care and infection.

1  
2  
3 “Well with the wound healing, what it was was the infection. Because of the smell I was  
4 constantly worrying that the work they [healthcare professionals] had done was wasted and  
5 that I would be back [in hospital] getting something else done.” (Participant 6)  
6  
7  
8  
9

10  
11 Once wounds had healed, the majority of concerns related to scar treatment options, notably  
12 pressure garments, splints, reconstruction and camouflage.  
13

14  
15 Four participants raised numerous concerns about the primary care (General Practitioner)  
16 team’s knowledge of burns injuries.  
17

18  
19 “I felt quite vulnerable because they didn’t have the [specialist] knowledge. I don’t think  
20 there is a lot of knowledge [about] burns, I really don’t.”  
21  
22

23 (Participant 12)  
24

25 An aspect of care that four participants felt was missing was support for family members,  
26 especially parents of young children. For one participant, who was assaulted, this was a  
27 significant concern.  
28  
29

30  
31 “There’s been no support offered for my kids. Even if it’s just to talk to somebody...”  
32

33 (Participant 8)  
34

### 35 c. Multi-Disciplinary Team

36  
37 Seventeen members of the clinical teams from the two centres contributed to item generation,  
38 which identified 54 potential concerns. Composition of the MDT is shown in table 2, with the  
39 list of concerns displayed in Appendix 2.  
40  
41

42 **Table 2 MDT members**  
43

| 44 Professional                     | 45 Number |
|-------------------------------------|-----------|
| 46 Consultant Burns Surgeon         | 3         |
| 47 Consultant Anaesthetist          | 2         |
| 48 Consultant Clinical Psychologist | 3         |
| 49 Physiotherapist                  | 3         |
| 50 Occupational Therapist           | 2         |
| 51 Staff Nurse                      | 4         |

52  
53  
54  
55  
56  
57  
58  
59  
60



### **Content Generation: variation between sources**

Whilst specific wording of concerns varied between the literature, patients and MDT sources, there was significant overlap and consistency in the content of the four domains (Appendix 3). There were also differences between the sources, with each contributing unique concerns, reinforcing the validity and importance of capturing multiple professional and patient perspectives during content generation.

For the physical and functional well-being domain, the concerns identified were largely consistent across all three sources. However, there were a few exceptions. Skin strength and dental health were concerns unique to patients. Dry skin, contractures and specific scar characteristics (shape, size and texture) were identified in the HRQoL tools and by members of the MDT but not during the patient interviews.

For the psychological, emotional and spiritual well-being domain, acceptance by society was a concern only raised by patients. Hypervigilance/increased awareness of danger, was not identified in the HRQoL tools. Change of personality was a concern identified by a member of the MDT, but this concern was not raised by patients.

For the social care and social well-being domain, concerns about driving were only raised by patients whereas religion, and responses by friends and family were identified by the MDT and HRQoL tools.

For the treatment related concerns domain, medication and the management of infection were concerns raised only by patients.

## CONTENT REFINEMENT

After removal of duplicate items, a total of 111 individual concerns, generated from the literature, patient interviews and the MDT were incorporated in the Delphi survey. Nine of the twelve (75%) patients that participated in the one to one interviews participated in the survey. Seventeen members of the MDT's at the two sites participated in the Delphi survey.

Fifty-eight items achieved a 60% consensus agreement following the two rounds of the Delphi survey and were retained for the inventory.

## GROUPING ITEMS IN DOMAINS

Five staff members independently allocated the final 58 concerns into one of the following four domains, which were previously identified from other versions of the PCI: physical and functional well-being (18 concerns); psychological, spiritual and emotional well-being (22 concerns); social care and social well-being (7 concerns); treatment related concerns (11 concerns). Categorisation of the final 58 concerns is shown in the Adult Burns Patients Concerns Inventory (Figures 2 and 3).

## Figure 2 and Figure 3 – The Completed PCI

## Discussion

The Adult Burns Patient Concerns Inventory is a 58-item prompt list that empowers patients to raise issues that are of greatest concern to them, which facilitates care providers to focus on these patient priorities. This study has captured the most important concerns experienced during recovery as perceived by patients and healthcare professionals, providing a tool that has shown to improve communication between patients and healthcare professionals in other healthcare settings, and has similar potential in the context of burn care.

In addition to the development of a new tool, this study has identified a number of other key findings. There was substantial overlap between the concerns raised by staff and patients. However, there were also notable differences. Staff raised issues and selected items that were more clinically driven whereas patients raised and selected issues that had an influence on their daily lives. Each source of content provided unique issues. Skin strength, infection, medication, dental health, acceptance and driving were concerns unique to the patient participants. On the other hand, scar characteristics, religion, personality, dry skin, contractures, friend's response and family's response were unique to HRQoL tools and the MDT. The importance of capturing concerns from both sides of the clinical consultation are demonstrated in the final PCI; five of these concerns appear on the PCI.

This study has demonstrated that burns patients experience a wide range of concerns relating to their physical and functional well-being. Concerns raised by the majority of patients such as pain, itch, sleep, and increased sensitivity are well described in the literature<sup>4 32-37</sup>. Concerns that were less prevalent however, are not well described. Dental health for instance, a concern for two individuals, is absent in the burns literature.

All patients raised concerns about scarring that impacted upon all four domains of the PCI. The physical appearance of scars, such as colour and texture, were considered important during development of the POSAS HRQoL tool<sup>28</sup> and therefore included during content generation, but patients in our study were more concerned about the overall appearance and functional limitations associated with scarring, and scar features were not retained during the Delphi exercise. This is consistent with findings from the PEGASUS qualitative study where patients also focused on the general appearance of scars<sup>38</sup>. The detailed characteristics of scars may be important when assessing the efficacy of clinical interventions, but are not of

1  
2  
3 specific concern to patients. This highlights the need to involve patients in making decisions  
4 about scar management.  
5  
6

7 The psychological, emotional and spiritual well-being domain contains more items than any  
8 other in the PCI. Many patients described these concerns as having greater and longer lasting  
9 impact than any other aspect of their injury and the central theme related to body image.  
10  
11 Persistent psychological symptoms, such as flashbacks and fear avoidance, relating to the  
12 injury event were also prevalent. Patients in this study were not assessed for Post-Traumatic  
13 Stress Disorder (PTSD) but their psychological concerns may align with the symptomatic  
14 profile of PTSD, which emphasises cognitive features such as the negative appraisal of  
15 traumatic events and its central role in the maintenance of psychological distress<sup>39 40</sup>. Many  
16 patients described their scarring as a constant reminder of their injury, which supports the  
17 growing evidence that appearance distress and PTSD symptomology are interlinked in  
18 patients with visible disfigurement<sup>41</sup>. Psychological interventions aimed at addressing PTSD  
19 symptoms therefore need to simultaneously identify and address concerns relating to body  
20 image.  
21  
22  
23  
24  
25  
26  
27  
28  
29

30 Stigma associated with mental health disorders is associated with poor self-esteem, self-  
31 confidence and reluctance to seek care<sup>42 43</sup>. Patients in our study were also concerned about  
32 the negative connotations and potential stigmatisation associated with mental health support.  
33  
34 Further work is required to identify patient friendly terminology for psychological support  
35 and to address the stigma associated with mental health disorders in the burns population.  
36  
37  
38  
39

40 Concerns identified for the domain of social care and social well-being were more consistent  
41 across the three sources used for content generation compared to the other PCI domains. The  
42 importance of social support for improving outcomes for burn survivors is well established<sup>44</sup>  
43  
44  
45 but less is known about the impact on families. All patients were concerned about  
46 significant psychological distress observed in spouses, family and friends, following the burn  
47 trauma, many of whom had witnessed the injury. This is consistent with evidence from one  
48 study that reported clinical anxiety, depression or PTSD-related symptoms in 77% of spouses  
49 and 56% of close relatives immediately following injury<sup>44</sup>. However, the study did not  
50 include long-term follow-up of relatives, therefore the long-term trajectory of psychological  
51 distress in relatives and its relationship to the long term psychological state of the patient  
52 remain unclear. Psychological support for family members was the only aspect of care that  
53  
54  
55  
56  
57  
58  
59  
60

1  
2  
3 patients felt was missing. Further research is needed on the prevalence of mental health  
4 conditions in family members and its impact on survivor recovery.  
5  
6

7 Treatment-related concerns tended to focus on burden, such as the number of appointments,  
8 number of operations, the number of prescribed medicines and their side effects, the impact  
9 of treatment on the family (such as childcare), time off work and the financial cost of  
10 attending appointments. The majority of patients accepted the necessity of treatment for their  
11 recovery. However, patients with extensive injuries were concerned about the impact of  
12 treatment in delaying reintegration into society. This is consistent with the significant impact  
13 of treatment burden reported in a recent qualitative study<sup>38</sup>, but further research is required to  
14 explore this in further detail.  
15  
16

17 The greatest potential limitation of this study, and similar HNA and HRQoL tools, is  
18 representativeness of the sampled patient population<sup>20</sup>. Whilst the purposive sampling  
19 strategy aimed to capture the underlying population, it did not cover the full demographic or  
20 clinical spectrum. Notably: all of the participants were white British, non-English speaking  
21 patients were excluded, and the age range did not include younger (under 28) and older (over  
22 60) patients. In addition, less common injuries such as frostbite were not included in the  
23 injury profile. It is therefore possible that the PCI does not capture concerns unique to  
24 patients from other cultures, age groups, or those with other types of burns. Once feasibility  
25 and acceptability of the Adult Burn PCI has been established, further validation work will  
26 help to establish its relevance for other populations not included in this study – and perhaps a  
27 version ‘two- point-zero’ in years hence along similar lines to the progression of other  
28 patient-centric tools including POSAS<sup>28</sup>.  
29  
30  
31  
32  
33  
34  
35  
36  
37  
38  
39  
40  
41  
42

43 A further limitation of the Adult Burn PCI is the use of single words (e.g. Itch) or short  
44 phrases (e.g. Loss of functioning). Whilst this facilitates inclusion of a broad range of  
45 concerns without over-burdening patients, the selected terms may not fully encapsulate the  
46 specifics of the issue that the patient wishes to talk about. However, the addition of a free text  
47 option allows patients to raise additional concerns and this information could be used to  
48 further refine the content.  
49  
50  
51  
52  
53

54 The next stage of validation for the Adult Burn PCI is to determine the feasibility and  
55 acceptability of the tool in a clinical setting and to optimise the mode of administration, for  
56 example paper and pencil, portable devices such as smartphones and internet-based platforms  
57  
58  
59  
60  
11<sup>46</sup>. Once feasibility has been established, a comparative study is required to determine

1  
2  
3 whether the PCI improves patient/consultant communication and clinical outcomes compared  
4 to standard practice.  
5  
6

### 7 **Conclusions**

8  
9  
10 We have developed the Adult Patient Concerns Inventory for Burns (PCI-B). Through this  
11 process, we believe burns survivors will be empowered to guide clinicians towards their most  
12 pressing needs, and to better navigate the numerous potential problems they encounter. The  
13 PCI-B as published in this paper can be freely used and re-branded so long as the content is  
14 not altered and the acknowledgements are retained.  
15  
16  
17  
18  
19  
20  
21  
22  
23  
24  
25  
26  
27  
28  
29  
30  
31  
32  
33  
34  
35  
36  
37  
38  
39  
40  
41  
42  
43  
44  
45  
46  
47  
48  
49  
50  
51  
52  
53  
54  
55  
56  
57  
58  
59  
60

## Acknowledgements

We would like to thank all patients and staff from the Mersey Regional Burns Centre, Whiston Hospital and subsequently The Welsh Centre for Burns and Plastic Surgery, Morriston Hospital for their participation in the study as well as the Katie Piper Foundation for both part-funding the study as well as advice on feasibility and initial proof of concept.

## Funding Statement:

This work was supported by The Katie Piper Foundation.

## Competing Interests Statement:

The authors declare no conflicts of interest.

## Authors Contribution

**JAGG** - Designed the study, conducted and analysed the literature review, patient interviews and the Delphi process. JAGG also wrote the early draft of the manuscript.

**JY** – Contributed relevant clinical evidence (burns Surgery) and assisted with patient recruitment.

**LB**- Contributed relevant clinical evidence (burns nursing) and assisted with patient recruitment.

**JE** - Contributed relevant clinical evidence (burns Occupational Therapy) and assisted with patient recruitment.

**SS** – Assisted JAGG with study design, independently conducted data analysis and assisted with supervised manuscript preparation.

**SR** – Conceived the initial PCI and provided extensive support for study design.

**KS** - Conceived the presented idea, encouraged JAGG to investigate the presented idea, acquired funding, contributed relevant clinical evidence (burns surgery), assisted with patient recruitment and supervised manuscript preparation. All authors discussed the results, provided a critical appraisal and contributed to the final manuscript.

## References

1. World Health Organisation. Global Burden of Disease. Switzerland: World Health Organization Press 2004:1-160.
2. World Health O. WHO | Burns: World Health Organization, 2017.
3. Gibson JAG, Spencer S, Rogers SN, et al. Formulating a Patient Concerns Inventory specific to adult burns patients: learning from the PCI concept in other specialties. *Scars, Burns & Healing* 2018;4:2059513118763382. doi: 10.1177/2059513118763382
4. Stavrou D, Weissman O, Tessone A, et al. Health Related Quality of Life in burn patients - A review of the literature. *Burns* 2014;40(5):788-96. doi: <http://dx.doi.org/10.1016/j.burns.2013.11.014>
5. Van Loey NE, Van Son MJ. Psychopathology and psychological problems in patients with burn scars: epidemiology and management. *American journal of clinical dermatology* 2003;4(4):245-72. doi: 444 [pii]
6. Connell KM, Phillips M, Coates R, et al. Sexuality, body image and relationships following burns: analysis of BSHS-B outcome measures. *Burns* 2014;40(7):1329-37. doi: <https://dx.doi.org/10.1016/j.burns.2014.01.006>
7. Piccolo MS, Gragnani A, Daher RP, et al. Burn Sexuality Questionnaire: Brazilian translation, validation and cultural adaptation. *Burns* 2013;39(5):942-9. doi: <https://dx.doi.org/10.1016/j.burns.2012.10.012>
8. Greenfield S, Kaplan SH, Ware JE, Jr., et al. Patients' participation in medical care: effects on blood sugar control and quality of life in diabetes. *Journal of General Internal Medicine* 1988;3(5):448-57. [published Online First: 1988/09/01]
9. Griffin SJ, Kinmonth AL, Veltman MW, et al. Effect on health-related outcomes of interventions to alter the interaction between patients and practitioners: a systematic review of trials. *Annals of family medicine* 2004;2(6):595-608. doi: 10.1370/afm.142 [published Online First: 2004/12/04]
10. Coulter A, Collins A. Making Shared Decision Making a Reality: No decision about me, without me. London: The King's Fund 2011.
11. Rogers SN, El-Sheikha J, Lowe D. The development of a Patients Concerns Inventory (PCI) to help reveal patients concerns in the head and neck clinic. *Oral Oncol* 2009;45(7):555-61. doi: 10.1016/j.oraloncology.2008.09.004
12. Ahmed A, Rogers S, Bruce H, et al. Development of a rheumatology-specific patient concerns inventory (PCI) and its use in the rheumatology outpatient clinic setting. *Annals of the Rheumatic Diseases* 2015;74(4):315-16.
13. Rooney AG, Netten A, McNamara S, et al. Assessment of a brain-tumour-specific Patient Concerns Inventory in the neuro-oncology clinic. *Supportive care in cancer : official journal of the Multinational Association of Supportive Care in Cancer* 2014;22(4):1059-69. doi: 10.1007/s00520-013-2058-2 [doi]
14. Kanatas A, Lowe D, Velikova G, et al. Issues patients would like to discuss at their review consultation in breast cancer clinics - A cross-sectional survey. *Tumori* 2014;100(5):568-79.
15. 10.1111%2Fj.1524 4725.2006.32169.x.
16. Ahmed AE, Lowe D, Kirton JA, et al. Development of a Rheumatology-specific Patient Concerns Inventory and Its Use in the Rheumatology Outpatient Clinic Setting. *The Journal of rheumatology* 2016;43(4):779-87. doi: <https://dx.doi.org/10.3899/jrheum.150068>
17. Ghazali N, Roe B, Lowe D, et al. Patients concerns inventory highlights perceived needs and concerns in head and neck cancer survivors and its impact on health-related



- quality of life. *The British journal of oral & maxillofacial surgery* 2015;53(4):371-9. doi: <https://dx.doi.org/10.1016/j.bjoms.2015.01.022>
18. Aaronson N, Alonso J, Burnam A, et al. Assessing health status and quality-of-life instruments: attributes and review criteria. *Qual Life Res* 2002;11(3):193-205. [published Online First: 2002/06/21]
19. Cano SJ, Browne JP, Lamping DL. Patient-based measures of outcome in plastic surgery: current approaches and future directions. *British Journal of Plastic Surgery* 2004;57(1):1-11.
20. Cano SJ, Hobart JC. The problem with health measurement. *Patient preference and adherence* 2011;5( ):279-90. doi: 10.2147/PPA.S14399
21. Braun V, Clarke V. Using thematic analysis in psychology. *Qualitative Research in Psychology* 2006;3(2):77-101. doi: 10.1191/1478088706qp063oa
22. Brod M, Tesler LE, Christensen TL. Qualitative research and content validity: developing best practices based on science and experience. *Qual Life Res* 2009;18(9):1263-78. doi: 10.1007/s11136-009-9540-9 [published Online First: 2009/09/29]
23. SurveyMonkey. SurveyMonkey n.d [Available from: [www.surveymonkey.com](http://www.surveymonkey.com) accessed 19th September 2016.
24. Griffiths C, Guest E, White P, et al. A Systematic Review of Patient-Reported Outcome Measures Used in Adult Burn Research. *Journal of Burn Care & Research: Official Publication of the American Burn Association* 2017;38(2):521-45. doi: 10.1097/BCR.0000000000000474
25. Kildal M, Andersson G, Fugl-Meyer A, et al. Development of a brief version of the Burn Specific Health Scale (BSHS-B). 2001;51(4):740-6.
26. Ryan CM, Schneider JC, Kazis LE, et al. Benchmarks for multidimensional recovery after burn injury in young adults: The development, validation, and testing of the american burn association/shriners hospitals for children young adult burn outcome questionnaire. *Journal of Burn Care and Research* 2013;34(3):e121-e42. doi: <http://dx.doi.org/10.1097/BCR.0b013e31827e7ecf>
27. Taal LA, Faber AW. The burn specific pain anxiety scale: introduction of a reliable and valid measure. *Burns* 1997;23(2):147-50. [published Online First: 1997/03/01]
28. Draaijers LJ, Tempelman FRH, Botman YAM, et al. The patient and observer scar assessment scale: a reliable and feasible tool for scar evaluation. *Plastic and Reconstructive Surgery* 2004;113(7):1967.
29. Lawrence JW, Heinberg LJ, Roca R, et al. Development and validation of the Satisfaction With Appearance Scale: Assessing body image among burn-injured patients. *Psychological Assessment* 1998;10(1):64-70. doi: 10.1037/1040-3590.10.1.64
30. EuroQol. EuroQol - a new facility for the measurement of health-related quality of life. *Health policy* 1990;16(3):199-208. doi: 10.1016/0168-8510(90)90421-9
31. Ware JE, Jr., Sherbourne CD. The MOS 36-item short-form health survey (SF-36). I. Conceptual framework and item selection. *Med Care* 1992;30(6):473-83.
32. Anzarut A, Chen M, Shankowsky H, et al. Quality-of-life and outcome predictors following massive burn injury. *Plast Reconstr Surg* 2005;116(3):791-7. [published Online First: 2005/09/06]
33. Pan R, Egberts MR, Nascimento LC, et al. Health-Related Quality of Life in adolescent survivors of burns: Agreement on self-reported and mothers' and fathers' perspectives. *Burns* 2015;41(5):1107-13. doi: <https://dx.doi.org/10.1016/j.burns.2014.12.011>
34. van Laarhoven AI, Ulrich DJ, Wilder-Smith OH, et al. Psychophysiological Processing of Itch in Patients with Chronic Post-burn Itch: An Exploratory Study. *Acta Derm Venereol* 2016;96(5):613-8. doi: <https://dx.doi.org/10.2340/00015555-2323>

- 1  
2  
3 35. Van Loey N, Bremer M, Faber AW, et al. Itching following burns: epidemiology and  
4 predictors. *British Journal of Dermatology* 2008;158(1):95-100. doi:  
5 doi:10.1111/j.1365-2133.2007.08278.x  
6
- 7 36. Van Loey NE, Faber AW, Taal LA. Do burn patients need burn specific multidisciplinary  
8 outpatient aftercare: research results. *Burns* 2001;27(2):103-10.
- 9 37. van Loey NE, van Beeck EF, Faber BW, et al. Health-related quality of life after burns: a  
10 prospective multicenter cohort study with 18 months follow-up. *J Trauma Acute Care*  
11 *Surg* 2012;72(2):513-20.
- 12 38. Jones LL, Calvert M, Moiemmen N, et al. Outcomes important to burns patients during scar  
13 management and how they compare to the concepts captured in burn-specific patient  
14 reported outcome measures. *Burns* 2017;43(8):1682-92. doi:  
15 10.1016/j.burns.2017.09.004  
16
- 17 39. Brewin CR, Holmes EA. Psychological theories of posttraumatic stress disorder. *Clinical*  
18 *Psychol Review* 2003;23(3):339-76. [published Online First: 2003/05/06]
- 19 40. Ehlers A, Clark DM. A cognitive model of posttraumatic stress disorder. *Behaviour*  
20 *research and therapy* 2000;38(4):319-45. [published Online First: 2000/04/13]
- 21 41. Macleod R, Shepherd L, Thompson AR. Posttraumatic stress symptomatology and  
22 appearance distress following burn injury: An interpretative phenomenological  
23 analysis. *Health Psychol* 2016;35(11):1197-204. doi: 10.1037/hea0000391 [published  
24 Online First: 2016/10/18]
- 25 42. Sartorius N. Stigma and mental health. *The Lancet* 2007;370(9590):810-11. doi:  
26 10.1016/S0140-6736(07)61245-8  
27
- 28 43. Corrigan P. How stigma interferes with mental health care. *American Psychologist*  
29 2004;59(7):614-25. doi: 10.1037/0003-066X.59.7.614  
30
- 31 44. Bond S, Gourlay C, Desjardins A, et al. Anxiety, depression and PTSD-related symptoms  
32 in spouses and close relatives of burn survivors: When the supporter needs to be  
33 supported. *Burns* 2017;43(3):592-601. doi: 10.1016/j.burns.2016.09.025 [published  
34 Online First: 2016/10/21]
- 35 45. Badger K, Royse D. Helping others heal: burn survivors and peer support. *Soc Work*  
36 *Health Care* 2010;49(1):1-18. doi: 10.1080/00981380903157963 [published Online  
37 First: 2010/01/16]
- 38 46. Rogers SN, Lowe D. An evaluation of the Head and Neck Cancer Patient Concerns  
39 Inventory across the Merseyside and Cheshire Network. *British Journal of Oral and*  
40 *Maxillofacial Surgery* 2014;52(7):615-23.  
41  
42  
43  
44  
45  
46  
47  
48  
49  
50  
51  
52  
53  
54  
55  
56  
57  
58  
59  
60

1  
2  
3 **Figure Legend**  
4

5 **Figure 1 – An overview of study design**  
6  
7

8 **Figure 2 and Figure 3 – The Completed PCI**  
9  
10  
11  
12  
13  
14  
15  
16  
17  
18  
19  
20  
21  
22  
23  
24  
25  
26  
27  
28  
29  
30  
31  
32  
33  
34  
35  
36  
37  
38  
39  
40  
41  
42  
43  
44  
45  
46  
47  
48  
49  
50  
51  
52  
53  
54  
55  
56  
57  
58  
59  
60

For peer review only

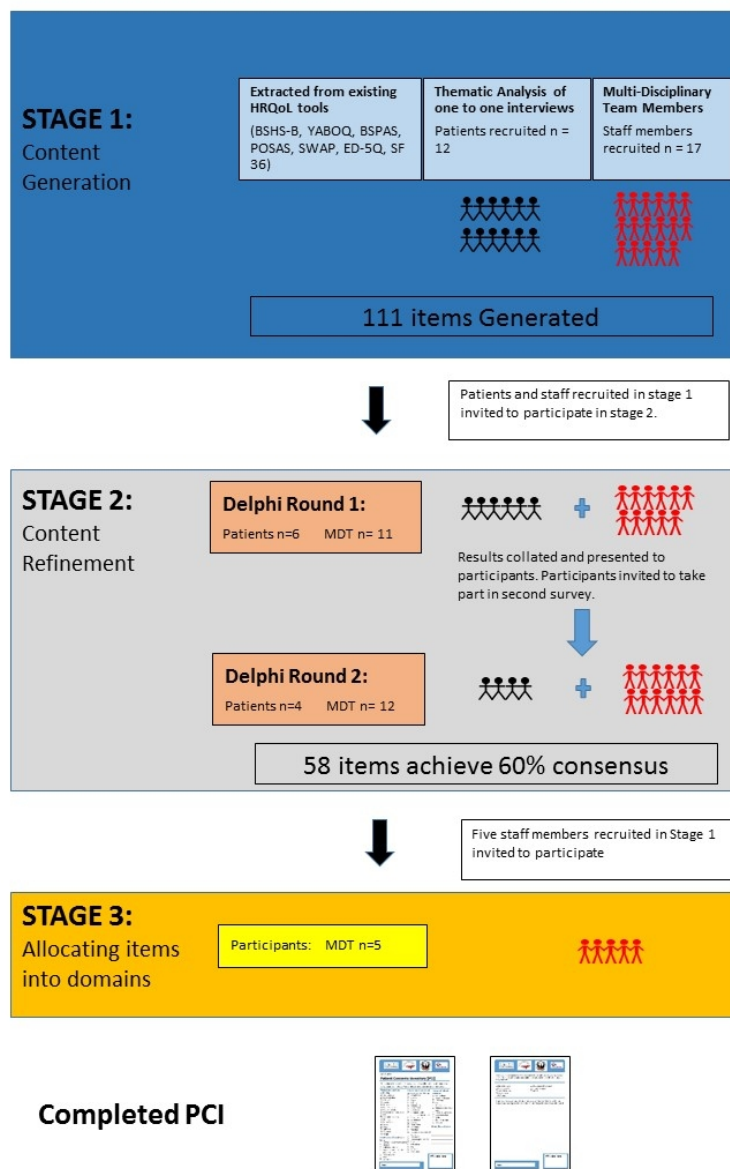

Figure 1 An overview of study design

190x275mm (96 x 96 DPI)

Insert tailored branding for PCI users/Burns services here.

Adult Burns

## Patient Concerns Inventory [PCI]

Please choose from the list of issues you would specifically like to talk about in your consultation in clinic today. You can choose more than one option (tick boxes).

| Physical and functional well-being:                                | Psychological, emotional and spiritual well-being:          | Treatment related concerns:                      |
|--------------------------------------------------------------------|-------------------------------------------------------------|--------------------------------------------------|
| <input type="checkbox"/> Contractures                              | <input type="checkbox"/> Acceptance                         | <input type="checkbox"/> Camouflage              |
| <input type="checkbox"/> Daily Activities                          | <input type="checkbox"/> Alcohol                            | <input type="checkbox"/> Dressing changes        |
| <input type="checkbox"/> Dry Skin                                  | <input type="checkbox"/> Anger                              | <input type="checkbox"/> Infection               |
| <input type="checkbox"/> Energy                                    | <input type="checkbox"/> Anxiety                            | <input type="checkbox"/> GP                      |
| <input type="checkbox"/> Exercise                                  | <input type="checkbox"/> Appearance                         | <input type="checkbox"/> Medication              |
| <input type="checkbox"/> Hand Function                             | <input type="checkbox"/> Body image                         | <input type="checkbox"/> Ongoing wound/scar care |
| <input type="checkbox"/> Heat Sensitivity                          | <input type="checkbox"/> Avoidance                          | <input type="checkbox"/> Pressure Garments       |
| <input type="checkbox"/> Increased skin sensitivity                | <input type="checkbox"/> Comments and questions from others | <input type="checkbox"/> Reconstruction          |
| <input type="checkbox"/> Itch                                      | <input type="checkbox"/> Concentration                      | <input type="checkbox"/> Splints                 |
| <input type="checkbox"/> Loss of functioning                       | <input type="checkbox"/> Confidence                         | <input type="checkbox"/> Support groups          |
| <input type="checkbox"/> Mobility                                  | <input type="checkbox"/> Coping                             | <input type="checkbox"/> Therapy                 |
| <input type="checkbox"/> Nerve Pain                                | <input type="checkbox"/> Depression                         |                                                  |
| <input type="checkbox"/> Pain                                      | <input type="checkbox"/> Emotions                           | <b>Other (Please State):</b>                     |
| <input type="checkbox"/> Scarring                                  | <input type="checkbox"/> Flashbacks                         | _____                                            |
| <input type="checkbox"/> Sleep                                     | <input type="checkbox"/> Increased awareness of danger      | _____                                            |
| <input type="checkbox"/> Stiffness                                 | <input type="checkbox"/> Low mood                           | _____                                            |
| <input type="checkbox"/> Tightness                                 | <input type="checkbox"/> Psychological Trauma               | _____                                            |
| <input type="checkbox"/> Weight                                    | <input type="checkbox"/> Relationships                      | _____                                            |
| <b>Social Care and Social well-being:</b>                          | <input type="checkbox"/> Self esteem                        | _____                                            |
| <input type="checkbox"/> Family/Support for my family              | <input type="checkbox"/> Sex                                | _____                                            |
| <input type="checkbox"/> Finance                                   | <input type="checkbox"/> Smoking                            | _____                                            |
| <input type="checkbox"/> Friends                                   | <input type="checkbox"/> The future                         | _____                                            |
| <input type="checkbox"/> Hobbies/Interests                         |                                                             |                                                  |
| <input type="checkbox"/> Legal implications of the accident/injury |                                                             |                                                  |
| <input type="checkbox"/> Personal Care                             |                                                             |                                                  |
| <input type="checkbox"/> Work/Education                            |                                                             |                                                  |

Name: \_\_\_\_\_

Affix label here

The adult burns, patient concerns Inventory

190x275mm (96 x 96 DPI)

1  
2  
3  
4  
5  
6  
7  
8  
9  
10  
11  
12  
13  
14  
15  
16  
17  
18  
19  
20  
21  
22  
23  
24  
25  
26  
27  
28  
29  
30  
31  
32  
33  
34  
35  
36  
37  
38  
39  
40  
41  
42  
43  
44  
45  
46  
47  
48  
49  
50  
51  
52  
53  
54  
55  
56  
57  
58  
59  
60

Insert tailored branding for PCI users/Burns services here.

The following page gives you the opportunity to highlight people you may wish to talk to. Are there any people you would specifically like to talk with either in clinic or by referral?

- Burns Surgeon
- Occupational Therapist
- Nursing Staff
- Physiotherapist
- Specialist Nurse
- Other:
- Psychologist
- .....
- Dietician

Thank you for your time. All information is confidential. We found PCI has helped patients express issues in their clinic. Please hand this is to clinic staff.

©The Burns PCI was developed in collaboration with Edge Hill University, The Mersey regional Burns Centre, The Welsh Centre for Burns, The Katie Piper Foundation and Aintree University Hospital

Name:

Affix label here

The adult burns, patient concerns Inventory  
190x275mm (96 x 96 DPI)

## Appendix

### Appendix 1 – List of Concerns Extracted from HRQoL tools.

| HRQoL Tool           | Domains of the Tool                                                                                                                                                                                | Content Extracted                                                                                                                                                                                                                   |
|----------------------|----------------------------------------------------------------------------------------------------------------------------------------------------------------------------------------------------|-------------------------------------------------------------------------------------------------------------------------------------------------------------------------------------------------------------------------------------|
| BSHS-B <sup>25</sup> | Simple abilities, heat sensitivity, hand function, treatment regimen, work, body image, affect, interpersonal relationships and sexuality.                                                         | Heat sensitivity, skin sensitivity, loneliness, low mood, hand function, work, day to day, sex, family, emotions, appearance, wounds, self-care, daily activities, social interactions, dressings, acceptance, scars and anxiety.   |
| YABOQ <sup>26</sup>  | Itch, family function, satisfaction with role, family concerns, pain satisfaction with symptoms, appearance, fine motor, social function, social function limited by appearance, sex and religion. | Itch, pain, mobility, hand function, hobbies/interests, appearance, peoples' perceptions, frustration, sex, anger, family, appetite, the future, sleep, work, study, religion, relationships, food, scars, uncertainty and anxiety. |
| BSPAS <sup>27</sup>  | N/A – Symptom specific.                                                                                                                                                                            | Wound healing, anxiety, dressing changes, pain, treatment, coping and surgery.                                                                                                                                                      |
| POSAS <sup>28</sup>  | N/A Symptom specific.                                                                                                                                                                              | Scar shape, scar size, scar texture, pain and itch.                                                                                                                                                                                 |
| SWAP <sup>29</sup>   | N/A Symptom specific.                                                                                                                                                                              | Family, people's perception, relationships, appearance, intimacy, friends, acceptance.                                                                                                                                              |
| ED5Q <sup>30</sup>   | Mobility, self-care, usual activities, pain/discomfort and anxiety and depression.                                                                                                                 | Mobility, Self-Care, Day to day activities, hand function, pain, anxiety and depression.                                                                                                                                            |
| SF36 <sup>31</sup>   | Physical functioning, role-physical, bodily pain, general health, vitality, social functioning, role-emotional and mental health                                                                   | Interest/hobbies, mobility, hand function, self-care, energy, fatigue, friends, family, relationships, pain, anxiety, exercise and concentration.                                                                                   |



1  
2  
3  
4  
5  
6  
7  
8  
9  
10  
11  
12  
13  
14  
15  
16  
17  
18  
19  
20  
21  
22  
23  
24  
25  
26  
27  
28  
29  
30  
31  
32  
33  
34  
35  
36  
37  
38  
39  
40  
41  
42  
43  
44  
45  
46  
47  
48  
49  
50  
51  
52  
53  
54  
55  
56  
57  
58  
59  
60

## Appendix 2 List of concerns from the MDT.

| Professional                     | Number | Items Added                                                                                                                                                                                                                                                                                                                                                                                                                                            |
|----------------------------------|--------|--------------------------------------------------------------------------------------------------------------------------------------------------------------------------------------------------------------------------------------------------------------------------------------------------------------------------------------------------------------------------------------------------------------------------------------------------------|
| Consultant Burns Surgeon         | 3      | Camouflagability<br>Guilt<br>Blame<br>Stigma<br>weight                                                                                                                                                                                                                                                                                                                                                                                                 |
| Consultant Anaesthetist          | 2      | Toileting<br>Chronic pain<br>Neuropathic pain                                                                                                                                                                                                                                                                                                                                                                                                          |
| Consultant Clinical Psychologist | 3      | Drug and alcohol use<br>Flashbacks<br>Withdrawal from usual activities<br>/Isolating self<br>Staring<br>Function generally<br>Pain generally<br>Nightmares<br>Intrusive thoughts or images<br>Guilt<br>Embarrassment<br>Avoidance of reminders of<br>accident/injury<br>Comments and questions from others<br>Contractures<br>Frustration<br>Hypervigilance – increased awareness<br>of danger<br>Inability to do certain tasks<br>Loss of functioning |
| Physiotherapist                  | 3      | Function<br>Normality<br>Therapy<br>Touch<br>Confidence<br>Ownership<br>Responsibility<br>Time<br>Enjoyment<br>Fear<br>Future<br>Confusion                                                                                                                                                                                                                                                                                                             |
| Occupational Therapist           | 2      | Compliance                                                                                                                                                                                                                                                                                                                                                                                                                                             |
| Staff Nurse                      | 4      | Reconstruction<br>Exclusion<br>Future – what does it hold?<br>Future – fear<br>Isolation<br>Why me?                                                                                                                                                                                                                                                                                                                                                    |



|  |  |                                                                                                                                                                     |
|--|--|---------------------------------------------------------------------------------------------------------------------------------------------------------------------|
|  |  | Family's response<br>Family support<br>Friend's response<br>Guilt<br>Further surgery<br>What now?<br>Dry skin<br>I'm ugly<br>They're ugly (scars)<br>This is me now |
|--|--|---------------------------------------------------------------------------------------------------------------------------------------------------------------------|

### Appendix 3

#### List of the total number of items identified

| HRQoL tools           | Patients         | Staff                                          |
|-----------------------|------------------|------------------------------------------------|
| Acceptance            | Acceptance       | Avoidance of reminders of accident/injury      |
| Anger                 | Alcohol          | blame                                          |
| Anxiety               | Anger            | Camouflagability                               |
| Appearance            | Anxiety          | Chronic pain                                   |
| Appetite              | Appetite         | Comments and questions from others             |
| Concentration         | Avoidance        | Compliance                                     |
| Coping                | Body image       | Confidence                                     |
| Daily activities      | Bullying         | Confusion                                      |
| Day to day activities | Burning pain     | Contractures                                   |
| Depression            | Camouflage       | Dry skin                                       |
| Dressings             | Chronic pain     | emotion                                        |
| Emotions              | Coping           | Enjoyment                                      |
| Energy                | Creams           | Exclusion                                      |
| Exercise              | Daily living     | Exercise                                       |
| Family                | Depression       | Family's response                              |
| Family                | Dressing changes | flashbacks                                     |
| Fatigue               | Driving          | Friend's response                              |
| Food                  | Family           | Frustration                                    |
| Friends               | Family Support   | Function                                       |
| Frustration           | Fatigue          | Further surgery                                |
| Hand function         | Fear             | Future – fear                                  |
| Heat sensitivity      | Finance          | Future – what does it hold?                    |
| Hobbies/interests     | Flashbacks       | GP                                             |
| Interest/hobbies      | Guilt            | Guilt                                          |
| Intimacy              | Hair             | Hyperalgesia/increased sensitivity to pain     |
| Itch                  | Hand function    | Hypervigilance – increased awareness of danger |
| Loneliness            | Heat sensitivity | I'm ugly                                       |
| Low mood              | Hobbies          | Inability to do certain tasks                  |
| Mobility              | Infection        | information                                    |
| Pain                  | Information      | Isolation                                      |
| Peoples' perceptions  | Intimacy         | Loss of functioning                            |

|                       |                      |                      |
|-----------------------|----------------------|----------------------|
| Relationships         | Itch                 | Neuropathic pain     |
| Religion              | Legal Implications   | Normal               |
| Scar Shape            | Low mood             | Normality            |
| Scar size             | Medication           | Online information   |
| Scar texture          | Mobility             | Ownership            |
| Scars                 | Nerve pain           | personality          |
| Self care             | Pain                 | Reconstruction       |
| Sex                   | People's perception  | Responsibility       |
| Skin sensitivity      | Personal care        | splints              |
| Sleep                 | Pregnancy            | Stigma               |
| Social interactions   | Pressure Garment     | stress               |
| Study                 | Psychological Trauma | Support groups       |
| Support for my family | Relationships        | Therapy              |
| Surgery               | Scarring             | They're ugly (scars) |
| The future            | Self-Esteem          | This is me now       |
| Uncertainty           | Skin sensitivity     | Time                 |
| Work                  | Skin strength        | To be touched        |
| Wound healing         | Sleep                | Toileting            |
| Wounds                | Smoking              | Touch                |
|                       | Splint               | weight               |
|                       | Tightness            | What now?            |
|                       | Travel               | Why me?              |
|                       | Treatment            |                      |
|                       | Weight               |                      |
|                       | Work and education   |                      |
|                       | Wound care           |                      |

## Appendix 4 – The completed PCI

Insert tailored branding for PCI users/Burns services here.

Adult Burns

## Patient Concerns Inventory [PCI]

Please choose from the list of issues you would specifically like to talk about in your consultation in clinic today. You can choose more than one option (tick boxes).

### Physical and functional well-being:

- Contractures
- Daily Activities
- Dry Skin
- Energy
- Exercise
- Hand Function
- Heat Sensitivity
- Increased skin sensitivity
- Itch
- Loss of functioning
- Mobility
- Nerve Pain
- Pain
- Scarring
- Sleep
- Stiffness
- Tightness
- Weight

### Social Care and Social well-being:

- Family/Support for my family
- Finance
- Friends
- Hobbies/Interests
- Legal implications of the accident/injury
- Personal Care
- Work/Education

### Psychological, emotional and spiritual well-being:

- Acceptance
- Alcohol
- Anger
- Anxiety
- Appearance
- Body image
- Avoidance
- Comments and questions from others
- Concentration
- Confidence
- Coping
- Depression
- Emotions
- Flashbacks
- Increased awareness of danger
- Low mood
- Psychological Trauma
- Relationships
- Self esteem
- Sex
- Smoking
- The future

### Treatment related concerns:

- Camouflage
- Dressing changes
- Infection
- GP
- Medication
- Ongoing wound/scar care
- Pressure Garments
- Reconstruction
- Splints
- Support groups
- Therapy

### Other (Please State):

\_\_\_\_\_

\_\_\_\_\_

\_\_\_\_\_

\_\_\_\_\_

\_\_\_\_\_

Affix label here

Name:

Insert tailored branding for PCI users/Burns services here.

The following page gives you the opportunity to highlight people you may wish to talk to. Are there any people you would specifically like to talk with either in clinic or by referral?

- |                                           |                                                 |
|-------------------------------------------|-------------------------------------------------|
| <input type="checkbox"/> Burns Surgeon    | <input type="checkbox"/> Occupational Therapist |
| <input type="checkbox"/> Nursing Staff    | <input type="checkbox"/> Physiotherapist        |
| <input type="checkbox"/> Specialist Nurse | <input type="checkbox"/> Other:                 |
| <input type="checkbox"/> Psychologist     | .....                                           |
| <input type="checkbox"/> Dietician        |                                                 |

Thank you for your time. All information is confidential. We found PCI has helped patients express issues in their clinic. Please hand this is to clinic staff.

©The Burns PCI was developed in collaboration with Edge Hill University, The Mersey regional Burns Centre, The Welsh Centre for Burns, The Katie Piper Foundation and Aintree University Hospital

Name:

Affix label here

# BMJ Open

## Development of the Adult Burns Patients Concerns Inventory

|                                 |                                                                                                                                                                                                                                                                                                                                                                                                                                                                                                                                                                                                                                                                                                                                                                                                                                                                                                                        |
|---------------------------------|------------------------------------------------------------------------------------------------------------------------------------------------------------------------------------------------------------------------------------------------------------------------------------------------------------------------------------------------------------------------------------------------------------------------------------------------------------------------------------------------------------------------------------------------------------------------------------------------------------------------------------------------------------------------------------------------------------------------------------------------------------------------------------------------------------------------------------------------------------------------------------------------------------------------|
| Journal:                        | <i>BMJ Open</i>                                                                                                                                                                                                                                                                                                                                                                                                                                                                                                                                                                                                                                                                                                                                                                                                                                                                                                        |
| Manuscript ID                   | bmjopen-2019-032785.R1                                                                                                                                                                                                                                                                                                                                                                                                                                                                                                                                                                                                                                                                                                                                                                                                                                                                                                 |
| Article Type:                   | Original research                                                                                                                                                                                                                                                                                                                                                                                                                                                                                                                                                                                                                                                                                                                                                                                                                                                                                                      |
| Date Submitted by the Author:   | 22-Aug-2019                                                                                                                                                                                                                                                                                                                                                                                                                                                                                                                                                                                                                                                                                                                                                                                                                                                                                                            |
| Complete List of Authors:       | Gibson, John; Edge Hill University, Postgraduate Medical Institute; Abertawe Bro Morgannwg University Health Board, The Welsh Centre for Burns & Plastic Surgery<br>Yarrow, Jeremy; Abertawe Bro Morgannwg University Health Board, The Welsh Centre for Burns & Plastic Surgery<br>Brown, Liz; Abertawe Bro Morgannwg University Health Board, The Welsh Centre for Burns & Plastic Surgery<br>Evans, Janine; Abertawe Bro Morgannwg University Health Board, The Welsh Centre for Burns & Plastic Surgery<br>Rogers, Simon; Aintree University Hospitals NHS Foundation Trust; Edge Hill College, Postgraduate Medical Institute<br>Spencer, Sally; Edge Hill University, Postgraduate Medical Institute (PGMI), Faculty of Health & Social Care<br>Shokrollahi, Kayvan; Edge Hill University, Postgraduate Medical Institute; Saint Helen's and Knowsley Teaching Hospitals NHS Trust, Mersey Regional Burns Centre |
| <b>Primary Subject Heading</b>: | Patient-centred medicine                                                                                                                                                                                                                                                                                                                                                                                                                                                                                                                                                                                                                                                                                                                                                                                                                                                                                               |
| Secondary Subject Heading:      | Surgery, Communication                                                                                                                                                                                                                                                                                                                                                                                                                                                                                                                                                                                                                                                                                                                                                                                                                                                                                                 |
| Keywords:                       | Burns, Patient Concerns Inventory, Health Related Quality of Life, Patient Centred Care                                                                                                                                                                                                                                                                                                                                                                                                                                                                                                                                                                                                                                                                                                                                                                                                                                |
|                                 |                                                                                                                                                                                                                                                                                                                                                                                                                                                                                                                                                                                                                                                                                                                                                                                                                                                                                                                        |

SCHOLARONE™  
Manuscripts

## **Development of the Adult Burns Patients Concerns Inventory**

John A. G. Gibson<sup>1,2\*</sup>, Jeremy Yarrow<sup>2</sup>, Liz Brown<sup>2</sup>, Janine Evans<sup>2</sup>, Simon N. Rogers<sup>1,3</sup>,  
Sally Spencer<sup>1</sup>, Kayvan Shokrollahi<sup>1,4</sup>

1. Postgraduate Medical Institute, Edge Hill University, Ormskirk, UK
2. The Welsh Centre for Burns & Plastic Surgery, Morriston Hospital, Swansea, UK
3. Merseyside Regional Maxillofacial Unit, University Hospital Aintree, Liverpool, UK
4. Mersey Regional Burns Centre, Whiston Hospital, Merseyside, UK

\*Corresponding Author

Email:johnaggibson@hotmail.com

Data Availability Statement: Anonymised qualitative interview data are available for a period of 10 years from the first author.

## Abstract

### Objectives

Identifying the issues and concerns that matter most to burns survivors can be challenging. For a number of reasons, but mainly relating to patient empowerment, some of the most pressing concerns patients may have during a clinical encounter may not naturally be the focal point of that encounter. The Patient Concerns Inventory (PCI) is a tried and tested concept initially developed in the field of head and neck cancer that empowers patients during a clinical encounter through provision of a list of prompts that allows patients to self-report concerns prior to consultation. The aim of this study was to develop a Patients Concerns Inventory (PCI) for adult burns patients.

### Design

Content for the PCI was generated from three sources: Burns Health Related Quality of Life (HRQoL) tools, thematic analysis of one-to-one interviews with twelve adult burns patients and seventeen Multi-Disciplinary Team (MDT) members. Content was refined using a Delphi consensus technique, with patients and staff members, using SurveyMonkey.

### Setting

Within outpatient secondary care.

### Participants

Twelve adult burn patients and MDT members from two regional burns centres.

### Results

A total of 111 individual items were generated from the three sources. The Delphi process refined the total number of items to 58. The main emergent domains were physical and functional well-being (18 items), psychological, emotional and spiritual well-being (22 items), social care and social well-being (7 items) and treatment-related concerns (11 items).

### Conclusions

The Adult, Burns-Specific Patient Concerns Inventory (PCI-B (adult)) is a 58-item, holistic prompt list, designed to be used in the outpatient clinic. It offers a new tool in burn care to improve communication between healthcare professionals and patients, empowering them to

1  
2  
3 identify their most pressing concerns and hence deliver a more focussed and targeted patient-  
4 centred clinical encounter.  
5  
6

7 **Keywords:** Burns; Health-Related Quality of Life, Holistic prompt list, Patient Concerns  
8 Inventory; PCI; patient-centred care.  
9  
10

### 11 **Strengths and Limitations of this study**

12  
13  
14

- 15 • The PCI offers a new tool in burn care to improve communication between healthcare  
16 professionals and patients
- 17 • The PCI – B (Adult) has been developed in accordance with international standards  
18 on Health Related Quality of Life tool development.
- 19 • Content within the PCI may not capture concerns unique to patients from other  
20 cultures, age groups, or those with other types of burns.
- 21 • Further work is required to determine the efficacy of the tool in the clinical setting.  
22  
23  
24  
25  
26  
27  
28  
29  
30  
31  
32  
33  
34  
35  
36  
37  
38  
39  
40  
41  
42  
43  
44  
45  
46  
47  
48  
49  
50  
51  
52  
53  
54  
55  
56  
57  
58  
59  
60



## Introduction

Globally, burns are the fourth most common form of trauma after road traffic accidents, falls and interpersonal violence <sup>1</sup>. In 2008, the World Health Organisation (WHO) estimated that 195,000 people died from fire-related injuries, a decrease of almost 40% in relation to 2004<sup>1</sup> <sup>2</sup>. The decline in mortality has been attributed to improved knowledge of the pathophysiological response to injury and progress in intensive care, nutrition, surgical techniques and infection control <sup>3</sup>. Consequently, more patients are surviving major burn injuries and require long-term support and rehabilitation.

The need for a holistic approach to burn care is essential if the many issues that a patient may encounter such as physical symptoms, psychological issues and reduced physical function are to be fully addressed <sup>4 5</sup>. In the time-restricted outpatient setting, identifying the issues and concerns that matter most to patients can be challenging. Furthermore, it is often difficult to identify patients that ‘suffer in silence’ and some concerns, for example the impact of burn injuries on sexual relationships, may be potentially embarrassing or difficult for both the patient and health care professional to discuss unless there is some mechanism or prompt to facilitate this <sup>6 7</sup>. The stress and anxiety associated with attending clinic appointments, often involving extensive journeys, may also cause patients to forget to raise important issues during the consultation.

An open, communicative relationship helps patients understand their health condition, improving satisfaction, improving health outcomes and reducing patient stress <sup>8 9</sup>. Improvements in patient-professional communication have been most notable in oncology where the concept of Holistic Needs Assessment (HNA) has become an integral aspect of care <sup>10</sup>. Rogers et al. developed and piloted a Patient Concerns Inventory (PCI) to assess the needs of patient with head and neck cancer <sup>11</sup>. The PCI, is a prompt list containing potential concerns, that patients may wish to discuss with their healthcare professional. It is completed prior to consultation, and enables the clinician to focus the discussion around the individual’s needs. The PCI has since been validated in rheumatology <sup>12</sup>, neuro-oncology <sup>13</sup> and breast cancer <sup>14</sup> and is associated with greater patient satisfaction, and service efficiency <sup>11 13 15-17</sup>.

The aim of this study was to develop a PCI for adult burns patients.

## Methods

The study comprised three distinct stages. Firstly, content for the PCI was generated from three sources: burns-specific health related quality of life (HRQoL) tools, one to one interviews with burns patients and focus groups with multi-disciplinary care teams (MDT) from two regional burns centres. Following this stage, items were refined using a Delphi process. The final stage of PCI development was to group items into discrete domains.

The need for both patient and professional involvement in the development of patient-focused tools is extensively documented within the literature. It is argued that such an approach is essential to ensure the tool adequately reflects the needs of the target population<sup>18-20</sup> and this approach was therefore adopted from the outset.

### 1. CONTENT GENERATION

#### a. HRQoL Tools

A systematic search of MEDLINE, the Cochrane library, Embase and PsycInfo was undertaken in June 2017 to identify HRQoL tools psychometrically validated for an adult burn population ( $\geq 18$ ). Grey literature was searched using Google Scholar and OpenGrey. The detailed search strategy is outlined in appendix 1.

Relevant items were extracted from the HRQoL measures by JAGG and independently verified by SS.

#### b. One-to-One Patient Interviews

Participants were recruited from two regional burn centres in the UK; The Welsh Centre for Burns & Plastic Surgery, Swansea and The Mersey Burns Centre, Liverpool, using the following eligibility criteria: Participants aged 18 or above, with a burn injury and actively receiving treatment. Participants unable to speak English or unable to provide informed consent were excluded.

A purposive sampling strategy was used to select participants representative of the wider burns population based on: age (18-30, 31-50, 50-65, >65), gender, mechanism of burn (scald, flame, contact, electrical and chemical), severity of burn (0-15% TBSA, >15%TBSA) and time following injury (<6 months since injury, 6 months -1 year, >1 year).

1  
2  
3 Eligible participants were identified by clinic staff and provided with participant information  
4 sheets describing the study. Those willing to participate contacted JAGG who arranged a  
5 suitable time and date for the interview. Written informed consent was provided by all  
6 participants prior to interviews, which were conducted in a confidential space in the burns  
7 centre using a semi-structured interview format. Participants were asked to describe concerns  
8 and issues encountered during the course of their recovery; the initial acute inpatient  
9 treatment (where applicable), outpatient treatment and their concerns for the future.  
10  
11  
12  
13  
14

15  
16 All interviews were conducted by JAGG. JAGG is a specialist registrar in Burns & Plastic  
17 Surgery and is a former burns survivor. Interviews were digitally audio-recorded and  
18 transcribed verbatim (JAGG). Data were analysed using a six step inductive thematic  
19 approach<sup>21</sup> supported by NVivo v12 software. Data collection and analysis were concurrent  
20 to enable determination of data saturation; where additional interviews did not yield new  
21 information<sup>22</sup>. Concerns described by participants were assigned unique codes and those  
22 deemed irrelevant to the PCI were excluded. Where possible, the wording of the codes was  
23 used in the language patients described their concerns. The codes that remained were the  
24 initial list of patient concerns. Coding was performed by JAGG and verified by SS who have  
25 extensive knowledge in qualitative analysis.  
26  
27  
28  
29  
30  
31  
32  
33

#### 34 c. Multi-Disciplinary Team (MDT)

35  
36 Staff from two regional burns centres provided content from the perspective of healthcare  
37 professionals. Informed consent was obtained from all staff participants. Items harvested in  
38 stage a) were reviewed by members of the MDT who then added additional items. Concerns  
39 devised from patients in stage b) were not shared with the MDT to enable comparison  
40 between groups.  
41  
42  
43  
44  
45  
46  
47  
48  
49  
50  
51  
52  
53  
54  
55  
56  
57  
58  
59  
60

## 2. CONTENT REFINEMENT

Incorporating every concern identified would have been extensive, placing a high burden on patients and staff in terms of completion time and analysis, therefore not feasible in the confines of an outpatient clinic<sup>20 22</sup>. Content reduction was therefore necessary at this stage to remove similar items and to achieve consensus on the final item list. Development of other versions of the PCI have confirmed that a checklist of 50-100 items is feasible in the outpatient setting<sup>11-13</sup>. An item bank was compiled from the three aforementioned sources; HRQoL tools, patient interviews and the MDT. An online Delphi process using SurveyMonkey software<sup>23</sup> was used to reduce and refine the item bank. To maintain stakeholder validity, both healthcare professionals and patients who participated in content generation were invited to take part. Participants were asked to select items for inclusion in the final PCI and to add additional items considered missing. Items with less than a 60% selection rate were excluded from the final PCI. The survey was repeated and items with a 60% agreement were retained in the final list of concerns. This level of consensus has been shown to be effective in previous versions of the PCI<sup>11-13</sup>.

A secondary outcome of the Delphi study was to gain feedback on the wording of individual items on the PCI. Significant overlap was generated from the three sources of content development. All items generated, included those that had similar definitions (e.g energy and fatigue) were included in the Delphi. Participants were asked to review the wording of the items to ensure that the list was deemed comprehensive by the intended audience and to select the term they considered most appropriate.

## 3. ITEM DOMAINS

The purpose of this stage was to group similar aspects of health together to help patients focus on one topic at a time when completing the PCI. The final list of concerns were allocated to one of the four following domains:

1. Physical and functional well-being.
2. Psychological, spiritual and emotional well-being.
3. Social care and social well-being.
4. Treatment related concerns.

These four domains feature on other versions of the PCI and are consistent with the domains of other general and disease specific HRQoL measures<sup>24</sup>. They were therefore deemed

1  
2  
3 appropriate for the adult burns PCI. A further Delphi process, using SurveyMonkey, was  
4 used to allocate items to domains based on 60% consensus from MDT staff.  
5  
6

#### 7 PATIENT AND PUBLIC INVOLVEMENT 8

9  
10 A patient and public involvement session was hosted by the Katie Piper Foundation. This  
11 informal focus group highlighted the disparity between issues considered important by health  
12 professionals managing care and patients receiving care. Patient feedback was used to design  
13 the study and aid with patient recruitment.  
14  
15  
16

#### 17 ETHICAL APPROVAL 18

19  
20 The study was approved by the Health Research Authority North West - Greater Manchester  
21 Central Research Ethics Committee 17/NW/0297 IRAS ID 214597 in May 2017 prior to the  
22 commencement of the study.  
23  
24  
25  
26  
27  
28  
29  
30  
31  
32  
33  
34  
35  
36  
37  
38  
39  
40  
41  
42  
43  
44  
45  
46  
47  
48  
49  
50  
51  
52  
53  
54  
55  
56  
57  
58  
59  
60

## RESULTS

A diagram displaying an overview of the three stages of tool development alongside the number of concerns generated is shown in Figure 1 – An overview of study design.

### CONTENT GENERATION

#### a. HRQoL tools

The search identified seven HRQoL tools. Five were disease specific; the Burn Specific Health Scale-Brief (BSHS-B)<sup>25</sup>, The Young Adult Burn Outcome Questionnaire (YABOQ)<sup>26</sup>, Burn Specific Pain Anxiety Scale (BSPAS)<sup>27</sup>, The Patient Observer Scar Assessment Scale (POSAS)<sup>28</sup>, The Satisfaction With Appearance Scale (SWAP)<sup>29</sup>. Two were generic; EQ 5D<sup>30</sup> and SF 36<sup>31</sup>. Forty-nine items were harvested from the seven measures (Appendix 2).

#### b. One to One Interviews

Twelve face-to-face interviews lasting for average of 46 minutes (20-85 mins) were conducted between August and September 2018. Saturation was determined as interviews number 11 and 12 did not lead to the emergence of any new codes. This was independently assessed by SS.

Population demographics are shown in Table 1.

**Table 1 Patient demographics**

|                                |             |
|--------------------------------|-------------|
| Patients, N                    | 12          |
| Age (yrs), mean (S.D)          | 47.9 (12.3) |
| Male, N                        | 7           |
| Female, N                      | 5           |
| White British                  | 12          |
| Years since injury, mean (S.D) | 13.3 (23.1) |
| Percentage TBSA, mean (range)  | 24 (1 -75)  |
| Aetiology                      |             |
| Contact burn, N                | 2           |
| Chemical burn, N               | 1           |
| Electrical burn, N             | 1           |
| Flame burn, N                  | 5           |
| Flash burn, N                  | 2           |
| Scald burn, N                  | 1           |
| Contractures, N                | 4           |
| Presence of scarring, N        | 9           |
| Type of scarring               |             |
| Pigmented, N                   | 5           |
| Hypertrophic, N                | 6           |
| Location of scarring           |             |
| Head & Neck, N                 | 5           |
| Upper Limb, N                  | 7           |
| Lower Limb, N                  | 4           |
| Torso, N                       | 6           |
| Surgical intervention, N       | 7           |

S.D –Standard Deviation

TBSA: Total Body Surface Area

1  
2  
3 A total of 97 individual codes were generated from the 12 interviews. Following removal of  
4 forty duplicate and similar items, 57 concerns remained. . Where possible, the wording of the  
5 concerns and issues outlined below, reflected the language used by the patients interviewed.  
6  
7

## 8 9 **Items Generated**

### 10 11 **Physical concerns relating to wounds and Scars**

12  
13 All twelve participants expressed concerns about potential scarring, though only nine had  
14 developed scars. When specifically probed about the physical appearance of scars, patients  
15 did not focus on specific features, such as the colour or texture; they were more concerned  
16 with overall appearance and the impact of scarring on other aspects of physical health and  
17 well-being, such as mobility. The following concerns were identified in relation to wounds  
18 and scars.  
19  
20  
21  
22  
23  
24

25 Pain was an overriding concern for all participants, at multiple time points of their recovery.  
26 *“I don’t remember what normal felt like...it sounds really stupid to say but a year has gone  
27 and I don’t know what it’s like to not be in pain.”* (Participant 8)  
28  
29  
30  
31

32 Nerve (neuropathic) pain was described separately by three patients and therefore considered  
33 a separate concern. The wording of “Nerve pain” was selected as this was the common  
34 language that patients described their symptoms.  
35  
36  
37  
38

39 Mobility was a concern raised by eight participants, such as an inability to perform routine  
40 day to day activities, arising from movement restriction, pain or skin sensitivity.  
41  
42

43 *“The initial part from laying down to sitting up to getting off the bed was really hard across  
44 the back [Patient had burn wounds to the back]. It was so painful, it was really hard.”*  
45

46 (Participant 11)  
47

48 Hand function was a concern expressed by all six participants that had injuries to the hand  
49 and upper limb. For one builder this issue severely limited his ability to work:  
50  
51

52 *“I still can’t grip with this one, [Lifts dominant left hand] that’s my grip [attempts to grip the  
53 investigators pen with limited success]. But it’s like stupid things, like I can’t hold a nail. I  
54 hold a nail and me arm shakes. I can’t hold a screw.”* (Participant 8)  
55  
56  
57  
58  
59  
60



1  
2  
3 Skin strength was a concern for five participants. For one participant, a self-employed  
4 mechanic, it had a substantial impact on his work:

5  
6 *“I’ve noticed a few times now that when I cut my hands on something, when you’re working,*  
7 *it opens the skin up quite easily. Whereas before it may have caused a scratch, now it’s a big*  
8 *problem.”*  
9 (Participant 2)

10  
11  
12  
13 Scar tightness was a concern for all nine participants that had scarring. For six patients this  
14 was related to mobility limitation and captured above, but for three participants, scar  
15 tightness was associated with discomfort rather mobility issues.

16  
17  
18 *“The groin is quite tight. It’s like I’ve got a pair of knickers on that are four sizes too small.”*  
19 (Participant 7)

20  
21  
22 Scar tightness was also a concern for patients with abdominal scarring during pregnancy.

23 Weight gain was a concern for four patients, arising from reduced mobility and excessive  
24 calorie intake. The excess weight increased participant’s dissatisfaction with their appearance  
25 and increased scar tightness resulting in additional discomfort.

26  
27  
28 Skin sensitivity was a concern for most of the interviewees, including itching during wound  
29 healing (four participants), scar sensitivity (six participants) and heat sensitivity (five  
30 participants).

31  
32  
33 *“When I got the slightest touch, I would just have to move.”*  
34 (Participant 6)

### 35 36 37 38 **Physical concerns not related to scars**

39 Concerns about other aspects of physical function included, sleep deprivation (seven  
40 participants), loss of appetite (four participants) and fatigue during the initial recovery stage  
41 (six participants), and lack of energy (four participants).

42  
43  
44 *“It’s a different tired to when you’re not getting sleep.”*

45  
46  
47 (Participant 2)

### 48 49 **Body image**

50 Physical appearance and body image was an important concern for all participants.

51  
52  
53 *“I still want nice normal skin. I want to look in a mirror and not see this burned flesh that*  
54 *stays with me all the time.”*  
55 (Participant 7)

1  
2  
3 As a direct consequence of scarring, nine participants described anxiety associated with  
4 acceptance by society. Five participants described a lack of confidence and low self esteem  
5 following the injury.  
6  
7

8 *“I just felt like nothing. I’m now very happy with my life but it [the injury] made me feel ugly*  
9 *and worthless.”* (Participant 7)  
10  
11

12  
13 Comments from others were of great concern throughout the recovery process for all twelve  
14 participants. Three patients reported bullying and another described discrimination in the  
15 workplace owing to scarring.  
16  
17

18 *“If I were to walk into a pub with you I would be the topic of conversation because I’m*  
19 *different. I see that and I feel that.”* (Participant 5)  
20  
21  
22

### 23 24 **Coping Strategies**

25  
26 Coping with the psychological sequelae of the injury was a concern for seven of the  
27 participants. Coping mechanisms such as increased alcohol consumption and smoking were  
28 concerns for two participants and avoidance of reminders were described by seven  
29 participants. For some, this impacted upon daily functioning.  
30  
31

32  
33 *“The stove is still a no go for me. I’m back in the kitchen doing butties and things like that*  
34 *but putting things on the stove I’m still a bit shaky.”* (Participant 6)  
35  
36  
37

38 Fear for the future and anger were other negative coping strategies described by participants  
39

40 *“I get angry now when I talk about it because I used to get a bit sad and a bit feeling down*  
41 *but I can’t now, I just get.... It’s like a rage that comes over me. No, I can’t work it out.”*  
42  
43

44 (Participant 4)  
45

### 46 **Mental health**

47  
48 Anxiety was encountered by five participants, causing considerable repercussions.  
49

50  
51 *“I’m suffering a lot from panic attacks, anxiety, really, really badly. There’s mornings now*  
52 *where I have to really argue with myself to actually wake up and go to work.”*  
53  
54

55 (Participant 8)  
56

57 Depression was experienced by five participants and low mood by eight.  
58

59 *“It would change my mood. It would bring me down and I’m not a person that’s down”*  
60

(Participant 2)

Participants described low mood to avoid the perceived stigma associated with mental health conditions. One participant described the impact of appropriate terminology:

*“If you say that people need help with their well-being and their full recovery, which means physical and mental in every sense, emotional and so on, that is better than implying that people must have mental health problems because they’ve been through a trauma. That would draw in a wider set of people who [wanted or needed] some kind of mental health support.”*

(Participant 9)

Dependence on others and guilt were described by seven and six patients respectively. Guilt was experienced mostly by patients who, witnessed other survivors with more severe injuries.

*“I felt ashamed and embarrassed and horrible and dirty and guilty because I’m alive really.”*

(Participant 7)

### **PTSD symptomology**

Seven participants suffered flashbacks of the injury event.

*“I would have the odd flashback. I try not to think about it ... as they were really bad.”*

(Participant 2)

Six participants described broad concerns and issues relating to their psychological and emotional well-being that could not be defined by any of the above themes. The term psychological trauma was used as the code. One patient who was assaulted, developed depression and PTSD:

*“I’ve had to stop thinking about it, because the more I was trying to think about why they did it, I was getting nowhere, ... but when I look at my arm sometimes, [the scar] it just triggers it again.”*

(Participant 8)

### **Social Well-Being**

All twelve participants were concerned about the impact of the injury on their intimate, personal and social relationships. Four participants raised specific concerns about intimacy.

*“Intimacy is awkward, you know... we still have a loving relationship but it’s not what it was before the accident. It was quite hard to come to terms with.”*

(Participant 4)

All participants were concerned about the impact of their injury on family members. Concerns related to the psychological trauma experienced by members of the family who witnessed the trauma:

*“My son was screaming, I mean he must have seen me on fire.”* (Participant 1)

Both physical and psychological aspects of the injury prevented six participants from continuing their regular hobbies and interests. Returning to work and education following the injury were concerns raised by ten participants. The financial implications of the injury were far reaching and perceived as an issue for six patients. For one participant, it was perceived as the most difficult aspect of the injury.

*“Financial that’s been.... If I’m honest with you, I’ve found that worse than the pain.”* (Participant 8)

### **Treatment Related Concerns**

All twelve participants expressed concerns about good communication with the clinical team in relation to their treatment. Communication was perceived as poor when patients did not feel that their needs were identified or addressed, leading to significant distress.

*“Some went “don’t you worry we’re doing what we can” kind of thing. So what are you doing? What is the plan? I kind of got the impression that had we not pushed, they wouldn’t have explained.”* (Participant 9)

On the other hand, excellent communication inspired greater confidence in the competence of healthcare professionals. In instances where treatment options were not available for particular issues, patients appreciated honesty.

*As an adult now, he’s helped me understand. It’s like he can do little bits to tidy me up. I think that I don’t want to accept it. He can’t get rid of it all but he can make me better. So I feel valued as a person not like the other consultants. It can do a lot of damage. It really can.*

(Participant 7)

In the early stages of recovery, patients had numerous concerns relating to wound care and infection.

1  
2  
3 “Well with the wound healing, what it was was the infection. Because of the smell I was  
4 constantly worrying that the work they [healthcare professionals] had done was wasted and  
5 that I would be back [in hospital] getting something else done.” (Participant 6)  
6  
7  
8  
9

10  
11 Once wounds had healed, the majority of concerns related to scar treatment options, notably  
12 pressure garments, splints, reconstruction and camouflage.  
13

14  
15 Four participants raised numerous concerns about the primary care (General Practitioner)  
16 team’s knowledge of burns injuries.  
17

18  
19 “I felt quite vulnerable because they didn’t have the [specialist] knowledge. I don’t think  
20 there is a lot of knowledge [about] burns, I really don’t.”  
21

22  
23 (Participant 12)  
24

25 An aspect of care that four participants felt was missing was support for family members,  
26 especially parents of young children. For one participant, who was assaulted, this was a  
27 significant concern.  
28

29  
30  
31 “There’s been no support offered for my kids. Even if it’s just to talk to somebody...”  
32

33 (Participant 8)  
34  
35  
36

### 37 c. Multi-Disciplinary Team

38  
39 Seventeen members of the clinical teams from the two centres contributed to item generation,  
40 which identified 54 potential concerns. Composition of the MDT is shown in table 2, with the  
41 list of concerns displayed in Appendix 3. The wording of items were devised by each staff  
42 member.  
43  
44  
45

46  
47 **Table 2 MDT members**

| Professional                     | Number |
|----------------------------------|--------|
| Consultant Burns Surgeon         | 3      |
| Consultant Anaesthetist          | 2      |
| Consultant Clinical Psychologist | 3      |
| Physiotherapist                  | 3      |
| Occupational Therapist           | 2      |
| Staff Nurse                      | 4      |

### **Content Generation: variation between sources**

Whilst specific wording of concerns varied between the literature, patients and MDT sources, there was significant overlap and consistency in the content of the four domains (Appendix 4). There were also differences between the sources, with each contributing unique concerns, reinforcing the validity and importance of capturing multiple professional and patient perspectives during content generation.

For the physical and functional well-being domain, the concerns identified were largely consistent across all three sources. However, there were a few exceptions. Skin strength and dental health were concerns unique to patients. Dry skin, contractures and specific scar characteristics (shape, size and texture) were identified in the HRQoL tools and by members of the MDT but not during the patient interviews.

For the psychological, emotional and spiritual well-being domain, acceptance by society was a concern only raised by patients. Hypervigilance/increased awareness of danger, was not identified in the HRQoL tools. Change of personality was a concern identified by a member of the MDT, but this concern was not raised by patients.

For the social care and social well-being domain, concerns about driving were only raised by patients whereas religion, and responses by friends and family were identified by the MDT and HRQoL tools.

For the treatment related concerns domain, medication and the management of infection were concerns raised only by patients.

## **CONTENT REFINEMENT**

After removal of duplicate items, a total of 111 individual concerns, generated from the literature, patient interviews and the MDT were incorporated in the Delphi survey. Nine of the twelve (75%) patients that participated in the one to one interviews participated in the survey. Seventeen members of the MDT's at the two sites participated in the Delphi survey.

Fifty-eight items achieved a 60% consensus agreement following the two rounds of the Delphi survey and were retained for the inventory.

## **GROUPING ITEMS IN DOMAINS**

Five staff members independently allocated the final 58 concerns into one of the following four domains, which were previously identified from other versions of the PCI: physical and functional well-being (18 concerns); psychological, spiritual and emotional well-being (22 concerns); social care and social well-being (7 concerns); treatment related concerns (11 concerns). Categorisation of the final 58 concerns is shown in the Adult Burns Patients Concerns Inventory (Appendix 5).

## Discussion

The Adult Burns Patient Concerns Inventory is a 58-item prompt list that empowers patients to raise issues that are of greatest concern to them, which facilitates care providers to focus on these patient priorities. This study has captured the most important concerns experienced during recovery as perceived by patients and healthcare professionals, providing a tool that has shown to improve communication between patients and healthcare professionals in other healthcare settings, and has similar potential in the context of burn care.

In addition to the development of a new tool, this study has identified a number of other key findings. There was substantial overlap between the concerns raised by staff and patients. However, there were also notable differences. Staff raised issues and selected items that were more clinically driven whereas patients raised and selected issues that had an influence on their daily lives. Each source of content provided unique issues. Skin strength, infection, medication, dental health, acceptance and driving were concerns unique to the patient participants. On the other hand, scar characteristics, religion, personality, dry skin, contractures, friend's response and family's response were unique to HRQoL tools and the MDT. The importance of capturing concerns from both sides of the clinical consultation are demonstrated in the final PCI; five of these concerns appear on the PCI. This study has demonstrated that burns patients experience a wide range of concerns relating to their physical and functional well-being. Concerns raised by the majority of patients such as pain, itch, sleep, and increased sensitivity are well described in the literature<sup>4 32-37</sup>. Concerns that were less prevalent however, are not well described. Dental health for instance, a concern for two individuals, is absent in the burns literature.

All patients raised concerns about scarring that impacted upon all four domains of the PCI. The physical appearance of scars, such as colour and texture, were considered important during development of the POSAS HRQoL tool<sup>28</sup> and therefore included during content generation, but patients in our study were more concerned about the overall appearance and functional limitations associated with scarring, and scar features were not retained during the Delphi exercise. This is consistent with findings from the PEGASUS qualitative study where patients also focused on the general appearance of scars<sup>38</sup>. Our findings may indicate that the detailed characteristics of scars may be important when assessing the efficacy of clinical interventions, but are not of specific concern to patients. Scar characteristics were however deemed important in a study, performed by Kool et al.<sup>39</sup>. The mixed method study aimed to



1  
2  
3 determine a hierarchical structure of HRQoL domains identified from a cohort of adult burns  
4 patients. The differences in these findings could be attributed to a different study population  
5 or the sample size in this present study. The discrepancies highlight the heterogeneity of  
6 concerns within the adult burns population and the need to hear each patient's voice.  
7  
8  
9

10 The psychological, emotional and spiritual well-being domain contains more items than any  
11 other in the PCI. Many patients described these concerns as having greater and longer lasting  
12 impact than any other aspect of their injury and the central theme related to body image.  
13 Persistent psychological symptoms, such as flashbacks and fear avoidance, relating to the  
14 injury event were also prevalent. Patients in this study were not assessed for Post-Traumatic  
15 Stress Disorder (PTSD) but their psychological concerns may align with the symptomatic  
16 profile of PTSD, which emphasises cognitive features such as the negative appraisal of  
17 traumatic events and its central role in the maintenance of psychological distress<sup>40 41</sup>. Many  
18 patients described their scarring as a constant reminder of their injury, which supports the  
19 growing evidence that appearance distress and PTSD symptomology are interlinked in  
20 patients with visible disfigurement<sup>42</sup>. Psychological interventions aimed at addressing PTSD  
21 symptoms therefore need to simultaneously identify and address concerns relating to body  
22 image.  
23  
24  
25  
26  
27  
28  
29  
30  
31  
32  
33

34 Stigma associated with mental health disorders is associated with poor self-esteem, self-  
35 confidence and reluctance to seek care<sup>43 44</sup>. Patients in our study were also concerned about  
36 the negative connotations and potential stigmatisation associated with mental health support.  
37 Further work is required to identify patient friendly terminology for psychological support  
38 and to address the stigma associated with mental health disorders in the burns population.  
39  
40  
41  
42  
43

44 Concerns identified for the domain of social care and social well-being were more consistent  
45 across the three sources used for content generation compared to the other PCI domains. The  
46 importance of social support for improving outcomes for burn survivors is well established<sup>45</sup>  
47<sup>46</sup> but less is known about the impact on families. All patients were concerned about  
48 significant psychological distress observed in spouses, family and friends, following the burn  
49 trauma, many of whom had witnessed the injury. This is consistent with evidence from one  
50 study that reported clinical anxiety, depression or PTSD-related symptoms in 77% of spouses  
51 and 56% of close relatives immediately following injury<sup>45</sup>. However, the study did not  
52 include long-term follow-up of relatives, therefore the long-term trajectory of psychological  
53 distress in relatives and its relationship to the long term psychological state of the patient  
54  
55  
56  
57  
58  
59  
60

1  
2  
3 remain unclear. Psychological support for family members was the only aspect of care that  
4 patients felt was missing. Further research is needed on the prevalence of mental health  
5 conditions in family members and its impact on survivor recovery. Treatment-related  
6 concerns tended to focus on burden, such as the number of appointments, number of  
7 operations, the number of prescribed medicines and their side effects, the impact of treatment  
8 on the family (such as childcare), time off work and the financial cost of attending  
9 appointments. The majority of patients accepted the necessity of treatment for their recovery.  
10 However, patients with extensive injuries were concerned about the impact of treatment in  
11 delaying reintegration into society. This is consistent with the significant impact of treatment  
12 burden reported in a recent qualitative study<sup>38</sup>, but further research is required to explore this  
13 in further detail.  
14  
15  
16  
17  
18  
19  
20  
21  
22

23 There is significant overlap with the findings of this study and those reported by Kool et al  
24 indicating the validity of the findings<sup>39</sup>. The study identified two key distinctions in HRQoL,  
25 resilience and vulnerability. Vulnerability included five domains; psychological, economic,  
26 social, physical and intimate/sexual. Resilience incorporated positive coping and social  
27 sharing.  
28  
29  
30  
31

32 Similar to our study, functional limitations and issues with scarring were the predominant  
33 aspects of the physical domain. Likewise, negative emotions, body perception and trauma  
34 related symptoms, cognitive problems were central to the psychological domain. Social  
35 aspects such as intimacy, finance and work were also predominant. Unique issues such as  
36 medication, their side effects and aspects relating to treatment burden were also considered  
37 important by participants. As described above, discrepancies between the two studies were  
38 observed with the physical characteristics with scarring, which indicate the importance of  
39 assessing the needs of patients on an individual basis.  
40  
41  
42  
43  
44  
45  
46

47 The greatest potential limitation of this study, and similar HNA and HRQoL tools, is  
48 representativeness of the sampled patient population<sup>20</sup>. Whilst the purposive sampling  
49 strategy aimed to capture the underlying population, it did not cover the full demographic or  
50 clinical spectrum. Notably: all of the participants were white British, non-English speaking  
51 patients were excluded, and the age range did not include younger (under 28) and older (over  
52 60) patients. In addition, less common injuries such as frostbite were not included in the  
53 injury profile. It is therefore possible that the PCI does not capture concerns unique to  
54 patients from other cultures, age groups, or those with other types of burns. Once feasibility  
55  
56  
57  
58  
59  
60

1  
2  
3 and acceptability of the Adult Burn PCI has been established, further validation work will  
4 help to establish its relevance for other populations not included in this study – and perhaps a  
5 version ‘two- point-zero’ in years hence along similar lines to the progression of other  
6 patient-centric tools including POSAS <sup>28</sup>.  
7  
8  
9

10  
11 A further limitation of the Adult Burn PCI is the use of single words (e.g. Itch) or short  
12 phrases (e.g. Loss of functioning). Whilst this facilitates inclusion of a broad range of  
13 concerns without over-burdening patients, the selected terms may not fully encapsulate the  
14 specifics of the issue that the patient wishes to talk about. However, the addition of a free text  
15 option allows patients to raise additional concerns and this information could be used to  
16 further refine the content.  
17  
18  
19  
20  
21

22 The next stage of validation for the Adult Burn PCI is to determine the feasibility and  
23 acceptability of the tool in a clinical setting and to optimise the mode of administration, for  
24 example paper and pencil, portable devices such as smartphones and internet-based platforms  
25 <sup>11 47</sup>. Once feasibility has been established, a comparative study is required to determine  
26 whether the PCI improves patient/consultant communication and clinical outcomes compared  
27 to standard practice.  
28  
29  
30  
31  
32

### 33 **Conclusions**

34  
35 We have developed the Adult Patient Concerns Inventory for Burns (PCI-B). Through this  
36 process, we believe burns survivors will be empowered to guide clinicians towards their most  
37 pressing needs, and to better navigate the numerous potential problems they encounter. The  
38 PCI-B as published in this paper can be freely used and re-branded so long as the content is  
39 not altered and the acknowledgements are retained.  
40  
41  
42  
43  
44

### 45 **Acknowledgements**

46  
47 We would like to thank all patients and staff from the Mersey Regional Burns Centre,  
48 Whiston Hospital and subsequently The Welsh Centre for Burns and Plastic Surgery,  
49 Morryston Hospital for their participation in the study. We would like to thank Miss Bethan  
50 Hughes, RuthAnn Fanstone and Ezinna Rospigliosi of the Katie Piper Foundation for their  
51 invaluable input into the early stages of the PCI development. We would like to acknowledge  
52 and thank the Katie Piper Foundation for part-funding the study.  
53  
54  
55  
56  
57  
58

### 59 **Funding Statement:**

1  
2  
3 This work was supported by The Katie Piper Foundation.  
4  
5

6 **Competing Interests Statement:**  
7

8 The authors declare no conflicts of interest.  
9

10 **Authors Contribution**  
11

12  
13 **JAGG** - Designed the study, conducted and analysed the literature review, patient interviews  
14 and the Delphi process. JAGG also wrote the early draft of the manuscript.  
15

16  
17 **JY** – Contributed relevant clinical evidence (burns Surgery) and assisted with patient  
18 recruitment.  
19

20  
21 **LB**- Contributed relevant clinical evidence (burns nursing) and assisted with patient  
22 recruitment.  
23

24  
25 **JE** - Contributed relevant clinical evidence (burns Occupational Therapy) and assisted with  
26 patient recruitment.  
27

28  
29 **SS** – Assisted JAGG with study design, independently conducted data analysis and assisted  
30 with supervised manuscript preparation.  
31

32  
33 **SR** – Conceived the initial PCI and provided extensive support for study design.  
34

35  
36 **KS** - Conceived the idea of a Burns-PCI and presented the idea, encouraged JAGG  
37 to investigate the presented idea, applied for and acquired funding for this research  
38 and contributed relevant clinical evidence (burns surgery). The majority of patients  
39 involved in the study were under the care of KS, whom afforded access to and  
40 assisted with patient recruitment, supervised manuscript preparation and editing,  
41 responses to peer-review comments, and final proof-reading of the manuscript. All  
42 authors discussed the results, provided a critical appraisal and contributed to the final  
43 manuscript.  
44  
45  
46  
47  
48  
49  
50  
51  
52  
53  
54  
55  
56  
57  
58  
59  
60

All authors discussed the results, provided a critical appraisal and contributed to the final manuscript.

## References

1. World Health Organisation. Global Burden of Disease. Switzerland: World Health Organization Press 2004:1-160.
2. World Health O. WHO | Burns: World Health Organization, 2017.
3. Gibson JAG, Spencer S, Rogers SN, et al. Formulating a Patient Concerns Inventory specific to adult burns patients: learning from the PCI concept in other specialties. *Scars, Burns & Healing* 2018;4:2059513118763382. doi: 10.1177/2059513118763382
4. Stavrou D, Weissman O, Tessone A, et al. Health Related Quality of Life in burn patients - A review of the literature. *Burns* 2014;40(5):788-96. doi: <http://dx.doi.org/10.1016/j.burns.2013.11.014>
5. Van Loey NE, Van Son MJ. Psychopathology and psychological problems in patients with burn scars: epidemiology and management. *American journal of clinical dermatology* 2003;4(4):245-72. doi: 444 [pii]
6. Connell KM, Phillips M, Coates R, et al. Sexuality, body image and relationships following burns: analysis of BSHS-B outcome measures. *Burns* 2014;40(7):1329-37. doi: <https://dx.doi.org/10.1016/j.burns.2014.01.006>
7. Piccolo MS, Gragnani A, Daher RP, et al. Burn Sexuality Questionnaire: Brazilian translation, validation and cultural adaptation. *Burns* 2013;39(5):942-9. doi: <https://dx.doi.org/10.1016/j.burns.2012.10.012>
8. Greenfield S, Kaplan SH, Ware JE, Jr., et al. Patients' participation in medical care: effects on blood sugar control and quality of life in diabetes. *Journal of General Internal Medicine* 1988;3(5):448-57. [published Online First: 1988/09/01]
9. Griffin SJ, Kinmonth AL, Veltman MW, et al. Effect on health-related outcomes of interventions to alter the interaction between patients and practitioners: a systematic review of trials. *Annals of family medicine* 2004;2(6):595-608. doi: 10.1370/afm.142 [published Online First: 2004/12/04]
10. Coulter A, Collins A. Making Shared Decision Making a Reality: No decision about me, without me. London: The King's Fund 2011.
11. Rogers SN, El-Sheikha J, Lowe D. The development of a Patients Concerns Inventory (PCI) to help reveal patients concerns in the head and neck clinic. *Oral Oncol* 2009;45(7):555-61. doi: 10.1016/j.oraloncology.2008.09.004
12. Ahmed A, Rogers S, Bruce H, et al. Development of a rheumatology-specific patient concerns inventory (PCI) and its use in the rheumatology outpatient clinic setting. *Annals of the Rheumatic Diseases* 2015;74(4):315-16.
13. Rooney AG, Netten A, McNamara S, et al. Assessment of a brain-tumour-specific Patient Concerns Inventory in the neuro-oncology clinic. *Supportive care in cancer : official journal of the Multinational Association of Supportive Care in Cancer* 2014;22(4):1059-69. doi: 10.1007/s00520-013-2058-2 [doi]
14. Kanatas A, Lowe D, Velikova G, et al. Issues patients would like to discuss at their review consultation in breast cancer clinics - A cross-sectional survey. *Tumori* 2014;100(5):568-79.
15. 10.1111%2Fj.1524 4725.2006.32169.x.

16. Ahmed AE, Lowe D, Kirton JA, et al. Development of a Rheumatology-specific Patient Concerns Inventory and Its Use in the Rheumatology Outpatient Clinic Setting. *The Journal of rheumatology* 2016;43(4):779-87. doi: <https://dx.doi.org/10.3899/jrheum.150068>
17. Ghazali N, Roe B, Lowe D, et al. Patients concerns inventory highlights perceived needs and concerns in head and neck cancer survivors and its impact on health-related quality of life. *The British journal of oral & maxillofacial surgery* 2015;53(4):371-9. doi: <https://dx.doi.org/10.1016/j.bjoms.2015.01.022>
18. Aaronson N, Alonso J, Burnam A, et al. Assessing health status and quality-of-life instruments: attributes and review criteria. *Qual Life Res* 2002;11(3):193-205. [published Online First: 2002/06/21]
19. Cano SJ, Browne JP, Lamping DL. Patient-based measures of outcome in plastic surgery: current approaches and future directions. *British Journal of Plastic Surgery* 2004;57(1):1-11.
20. Cano SJ, Hobart JC. The problem with health measurement. *Patient preference and adherence* 2011;5():279-90. doi: 10.2147/PPA.S14399
21. Braun V, Clarke V. Using thematic analysis in psychology. *Qualitative Research in Psychology* 2006;3(2):77-101. doi: 10.1191/1478088706qp063oa
22. Brod M, Tesler LE, Christensen TL. Qualitative research and content validity: developing best practices based on science and experience. *Qual Life Res* 2009;18(9):1263-78. doi: 10.1007/s11136-009-9540-9 [published Online First: 2009/09/29]
23. SurveyMonkey. SurveyMonkey n.d [Available from: [www.surveymonkey.com](http://www.surveymonkey.com) accessed 19th September 2016.
24. Griffiths C, Guest E, White P, et al. A Systematic Review of Patient-Reported Outcome Measures Used in Adult Burn Research. *Journal of Burn Care & Research: Official Publication of the American Burn Association* 2017;38(2):521-45. doi: 10.1097/BCR.0000000000000474
25. Kildal M, Andersson G, Fugl-Meyer A, et al. Development of a brief version of the Burn Specific Health Scale (BSHS-B). 2001;51(4):740-6.
26. Ryan CM, Schneider JC, Kazis LE, et al. Benchmarks for multidimensional recovery after burn injury in young adults: The development, validation, and testing of the american burn association/shriners hospitals for children young adult burn outcome questionnaire. *Journal of Burn Care and Research* 2013;34(3):e121-e42. doi: <http://dx.doi.org/10.1097/BCR.0b013e31827e7ecf>
27. Taal LA, Faber AW. The burn specific pain anxiety scale: introduction of a reliable and valid measure. *Burns* 1997;23(2):147-50. [published Online First: 1997/03/01]
28. Draaijers LJ, Tempelman FRH, Botman YAM, et al. The patient and observer scar assessment scale: a reliable and feasible tool for scar evaluation. *Plastic and Reconstructive Surgery* 2004;113(7):1967.
29. Lawrence JW, Heinberg LJ, Roca R, et al. Development and validation of the Satisfaction With Appearance Scale: Assessing body image among burn-injured patients. *Psychological Assessment* 1998;10(1):64-70. doi: 10.1037/1040-3590.10.1.64
30. EuroQol. EuroQol - a new facility for the measurement of health-related quality of life. *Health policy* 1990;16(3):199-208. doi: 10.1016/0168-8510(90)90421-9
31. Ware JE, Jr., Sherbourne CD. The MOS 36-item short-form health survey (SF-36). I. Conceptual framework and item selection. *Med Care* 1992;30(6):473-83.
32. Anzarut A, Chen M, Shankowsky H, et al. Quality-of-life and outcome predictors following massive burn injury. *Plast Reconstr Surg* 2005;116(3):791-7. [published Online First: 2005/09/06]



- 1  
2  
3  
4  
5  
6  
7  
8  
9  
10  
11  
12  
13  
14  
15  
16  
17  
18  
19  
20  
21  
22  
23  
24  
25  
26  
27  
28  
29  
30  
31  
32  
33  
34  
35  
36  
37  
38  
39  
40  
41  
42  
43  
44  
45  
46  
47  
48  
49  
50  
51  
52  
53  
54  
55  
56  
57  
58  
59  
60
33. Pan R, Egberts MR, Nascimento LC, et al. Health-Related Quality of Life in adolescent survivors of burns: Agreement on self-reported and mothers' and fathers' perspectives. *Burns* 2015;41(5):1107-13. doi: <https://dx.doi.org/10.1016/j.burns.2014.12.011>
  34. van Laarhoven AI, Ulrich DJ, Wilder-Smith OH, et al. Psychophysiological Processing of Itch in Patients with Chronic Post-burn Itch: An Exploratory Study. *Acta Derm Venereol* 2016;96(5):613-8. doi: <https://dx.doi.org/10.2340/00015555-2323>
  35. Van Loey N, Bremer M, Faber AW, et al. Itching following burns: epidemiology and predictors. *British Journal of Dermatology* 2008;158(1):95-100. doi: doi:10.1111/j.1365-2133.2007.08278.x
  36. Van Loey NE, Faber AW, Taal LA. Do burn patients need burn specific multidisciplinary outpatient aftercare: research results. *Burns* 2001;27(2):103-10.
  37. van Loey NE, van Beeck EF, Faber BW, et al. Health-related quality of life after burns: a prospective multicenter cohort study with 18 months follow-up. *J Trauma Acute Care Surg* 2012;72(2):513-20.
  38. Jones LL, Calvert M, Moiemmen N, et al. Outcomes important to burns patients during scar management and how they compare to the concepts captured in burn-specific patient reported outcome measures. *Burns* 2017;43(8):1682-92. doi: 10.1016/j.burns.2017.09.004
  39. Kool MB, Geenen R, Egberts MR, et al. Patients' perspectives on quality of life after burn. *Burns* 2017;43(4):747-56. doi: <https://doi.org/10.1016/j.burns.2016.11.016>
  40. Brewin CR, Holmes EA. Psychological theories of posttraumatic stress disorder. *Clinical Psychol Review* 2003;23(3):339-76. [published Online First: 2003/05/06]
  41. Ehlers A, Clark DM. A cognitive model of posttraumatic stress disorder. *Behaviour research and therapy* 2000;38(4):319-45. [published Online First: 2000/04/13]
  42. Macleod R, Shepherd L, Thompson AR. Posttraumatic stress symptomatology and appearance distress following burn injury: An interpretative phenomenological analysis. *Health Psychol* 2016;35(11):1197-204. doi: 10.1037/hea0000391 [published Online First: 2016/10/18]
  43. Sartorius N. Stigma and mental health. *The Lancet* 2007;370(9590):810-11. doi: 10.1016/S0140-6736(07)61245-8
  44. Corrigan P. How stigma interferes with mental health care. *American Psychologist* 2004;59(7):614-25. doi: 10.1037/0003-066X.59.7.614
  45. Bond S, Gourlay C, Desjardins A, et al. Anxiety, depression and PTSD-related symptoms in spouses and close relatives of burn survivors: When the supporter needs to be supported. *Burns* 2017;43(3):592-601. doi: 10.1016/j.burns.2016.09.025 [published Online First: 2016/10/21]
  46. Badger K, Royse D. Helping others heal: burn survivors and peer support. *Soc Work Health Care* 2010;49(1):1-18. doi: 10.1080/00981380903157963 [published Online First: 2010/01/16]
  47. Rogers SN, Lowe D. An evaluation of the Head and Neck Cancer Patient Concerns Inventory across the Merseyside and Cheshire Network. *British Journal of Oral and Maxillofacial Surgery* 2014;52(7):615-23.

1  
2  
3  
4  
5  
6  
7  
8  
9  
10  
11  
12  
13  
14  
15  
16  
17  
18  
19  
20  
21  
22  
23  
24  
25  
26  
27  
28  
29  
30  
31  
32  
33  
34  
35  
36  
37  
38  
39  
40  
41  
42  
43  
44  
45  
46  
47  
48  
49  
50  
51  
52  
53  
54  
55  
56  
57  
58  
59  
60

**Figure Legend**

**Figure 1 – An overview of study design**

For peer review only



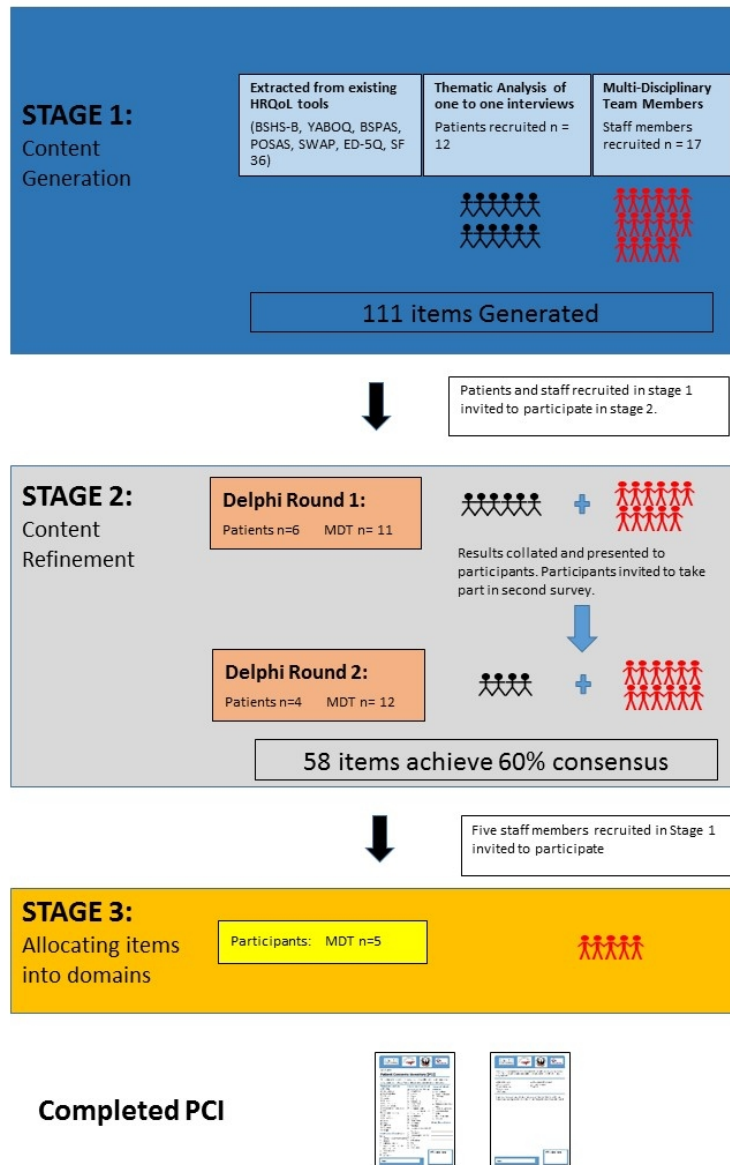

Figure 1 An overview of study design

190x275mm (96 x 96 DPI)

## **Appendix**

### **Appendix 1 – search strategy for HRQoL tools**

A structured review of the literature was performed in November 2017 to identify current HNA, HRQoL tools and PROMs used in clinical practice and research within the burn population. To meet the objectives of the literature review, articles related to HRQoL assessment and articles outlining the original development of the tool were selected.

#### **Search terms**

# 1 Medical Subject Heading (MeSH) Burns – explode all trees.

# 2 Keyword Burn\*.

# 3 Keyword Thermal Injury\*

# 4 Keyword Holistic Need\*s Assessment\*.

# 5 Keyword Prompt list\*.

# 6 MeSH term Survey and Questionnaires explode all trees.

# 7 MeSH term Health Service Needs – explode all trees.

# 8 Keyword – unmet need\*.

# 9 OR #4 OR #5 OR #6 OR #7 OR #8

# 10 #1 OR #2 OR #3.

#11 #9 AND #10

#### **Inclusion Criteria**

- The tool must be utilised in an adult, burn population. With an adult defined as greater than 18 years of age, as this is when patients enter the adult health services. As the Burns PCI is intended for adults, paediatric tools were deemed irrelevant.
- Tool is patient reported. The aim of the Burns PCI is to prospectively identify patients' concerns, thus healthcare reported tools are irrelevant.

## Exclusion Criteria

- Articles using instruments that were not patient reported (e.g. family member, carer or clinician). As the PCI aims to capture the concerns and issues of patients, tools capturing content from family members, carers or healthcare professionals were deemed irrelevant.
- Articles using generic PROMs that focus on one symptom (e.g. pain). A generic tool being defined as an instrument intended for use in general populations or across a wide range of disease conditions but not specifically to burns patients (Fayers and Machin, 2007). Whilst a number of such tools utilised in adult burn care research (Griffiths et al., 2017), it was believed that such tools mainly focused on assessing the severity of symptoms that were not directly derived from the burn population.
- Articles reporting data/utilising a tool from the paediatric population.
- Articles outlining the cultural validation of HRQoL tools were excluded.
- PROMs and HRQoL tools must have psychometric evidence confirming their reliability, validity and responsiveness; an essential criteria of a HRQoL tool (Aaronson et al., 2002).

**Appendix 2 – List of Concerns Extracted from HRQoL tools.**

| <b>HRQoL Tool</b>    | <b>Domains of the Tool</b>                                                                                                                                                                         | <b>Content Extracted</b>                                                                                                                                                                                                            |
|----------------------|----------------------------------------------------------------------------------------------------------------------------------------------------------------------------------------------------|-------------------------------------------------------------------------------------------------------------------------------------------------------------------------------------------------------------------------------------|
| BSHS-B <sup>25</sup> | Simple abilities, heat sensitivity, hand function, treatment regimen, work, body image, affect, interpersonal relationships and sexuality.                                                         | Heat sensitivity, skin sensitivity, loneliness, low mood, hand function, work, day to day, sex, family, emotions, appearance, wounds, self-care, daily activities, social interactions, dressings, acceptance, scars and anxiety.   |
| YABOQ <sup>26</sup>  | Itch, family function, satisfaction with role, family concerns, pain satisfaction with symptoms, appearance, fine motor, social function, social function limited by appearance, sex and religion. | Itch, pain, mobility, hand function, hobbies/interests, appearance, peoples' perceptions, frustration, sex, anger, family, appetite, the future, sleep, work, study, religion, relationships, food, scars, uncertainty and anxiety. |
| BSPAS <sup>27</sup>  | N/A – Symptom specific.                                                                                                                                                                            | Wound healing, anxiety, dressing changes, pain, treatment, coping and surgery.                                                                                                                                                      |
| POSAS <sup>28</sup>  | N/A Symptom specific.                                                                                                                                                                              | Scar shape, scar size, scar texture, pain and itch.                                                                                                                                                                                 |
| SWAP <sup>29</sup>   | N/A Symptom specific.                                                                                                                                                                              | Family, people's perception, relationships, appearance, intimacy, friends, acceptance.                                                                                                                                              |
| ED5Q <sup>30</sup>   | Mobility, self-care, usual activities, pain/discomfort and anxiety and depression.                                                                                                                 | Mobility, Self-Care, Day to day activities, hand function, pain, anxiety and depression.                                                                                                                                            |
| SF36 <sup>31</sup>   | Physical functioning, role-physical, bodily pain, general health, vitality, social functioning, role-emotional and mental health                                                                   | Interest/hobbies, mobility, hand function, self-care, energy, fatigue, friends, family, relationships, pain, anxiety, exercise and concentration.                                                                                   |

**Appendix 3 List of concerns from the MDT.**

| <b>Professional</b>              | <b>Number</b> | <b>Items Added</b>                                                                                                                                                                                                                                                                                                                                                                                                                                     |
|----------------------------------|---------------|--------------------------------------------------------------------------------------------------------------------------------------------------------------------------------------------------------------------------------------------------------------------------------------------------------------------------------------------------------------------------------------------------------------------------------------------------------|
| Consultant Burns Surgeon         | 3             | Camouflagability<br>Guilt<br>Blame<br>Stigma<br>weight                                                                                                                                                                                                                                                                                                                                                                                                 |
| Consultant Anaesthetist          | 2             | Toileting<br>Chronic pain<br>Neuropathic pain                                                                                                                                                                                                                                                                                                                                                                                                          |
| Consultant Clinical Psychologist | 3             | Drug and alcohol use<br>Flashbacks<br>Withdrawal from usual activities<br>/Isolating self<br>Staring<br>Function generally<br>Pain generally<br>Nightmares<br>Intrusive thoughts or images<br>Guilt<br>Embarrassment<br>Avoidance of reminders of<br>accident/injury<br>Comments and questions from others<br>Contractures<br>Frustration<br>Hypervigilance – increased awareness<br>of danger<br>Inability to do certain tasks<br>Loss of functioning |
| Physiotherapist                  | 3             | Function<br>Normality<br>Therapy<br>Touch<br>Confidence<br>Ownership<br>Responsibility<br>Time<br>Enjoyment<br>Fear<br>Future<br>Confusion                                                                                                                                                                                                                                                                                                             |
| Occupational Therapist           | 2             | Compliance                                                                                                                                                                                                                                                                                                                                                                                                                                             |
| Staff Nurse                      | 4             | Reconstruction<br>Exclusion<br>Future – what does it hold?<br>Future – fear<br>Isolation<br>Why me?                                                                                                                                                                                                                                                                                                                                                    |

|  |  |                                                                                                                                                                     |
|--|--|---------------------------------------------------------------------------------------------------------------------------------------------------------------------|
|  |  | Family's response<br>Family support<br>Friend's response<br>Guilt<br>Further surgery<br>What now?<br>Dry skin<br>I'm ugly<br>They're ugly (scars)<br>This is me now |
|--|--|---------------------------------------------------------------------------------------------------------------------------------------------------------------------|

#### Appendix 4- List of the total number of items identified

| HRQoL tools           | Patients           | Staff                                          |
|-----------------------|--------------------|------------------------------------------------|
| Acceptance            | Acceptance         | Avoidance of reminders of accident/injury      |
| Anger                 | Alcohol            | blame                                          |
| Anxiety               | Anger              | Camouflagability                               |
| Appearance            | Anxiety            | Chronic pain                                   |
| Appetite              | Appetite           | Comments and questions from others             |
| Concentration         | Avoidance          | Compliance                                     |
| Coping                | Body image         | Confidence                                     |
| Daily activities      | Bullying           | Confusion                                      |
| Day to day activities | Burning pain       | Contractures                                   |
| Depression            | Camouflage         | Dry skin                                       |
| Dressings             | Chronic pain       | emotion                                        |
| Emotions              | Coping             | Enjoyment                                      |
| Energy                | Creams             | Exclusion                                      |
| Exercise              | Daily living       | Exercise                                       |
| Family                | Depression         | Family's response                              |
| Family                | Dressing changes   | flashbacks                                     |
| Fatigue               | Driving            | Friend's response                              |
| Food                  | Family             | Frustration                                    |
| Friends               | Family Support     | Function                                       |
| Frustration           | Fatigue            | Further surgery                                |
| Hand function         | Fear               | Future – fear                                  |
| Heat sensitivity      | Finance            | Future – what does it hold?                    |
| Hobbies/interests     | Flashbacks         | GP                                             |
| Interest/hobbies      | Guilt              | Guilt                                          |
| Intimacy              | Hair               | Hyperalgesia/increased sensitivity to pain     |
| Itch                  | Hand function      | Hypervigilance – increased awareness of danger |
| Loneliness            | Heat sensitivity   | I'm ugly                                       |
| Low mood              | Hobbies            | Inability to do certain tasks                  |
| Mobility              | Infection          | information                                    |
| Pain                  | Information        | Isolation                                      |
| Peoples' perceptions  | Intimacy           | Loss of functioning                            |
| Relationships         | Itch               | Neuropathic pain                               |
| Religion              | Legal Implications | Normal                                         |

|    |                       |                      |                      |
|----|-----------------------|----------------------|----------------------|
| 1  |                       |                      |                      |
| 2  |                       |                      |                      |
| 3  | Scar Shape            | Low mood             | Normality            |
| 4  | Scar size             | Medication           | Online information   |
| 5  | Scar texture          | Mobility             | Ownership            |
| 6  | Scars                 | Nerve pain           | personality          |
| 7  | Self care             | Pain                 | Reconstruction       |
| 8  | Sex                   | People's perception  | Responsibility       |
| 9  | Sex                   | People's perception  | Responsibility       |
| 10 | Sex                   | People's perception  | Responsibility       |
| 11 | Skin sensitivity      | Personal care        | splints              |
| 12 | Sleep                 | Pregnancy            | Stigma               |
| 13 | Social interactions   | Pressure Garment     | stress               |
| 14 | Study                 | Psychological Trauma | Support groups       |
| 15 | Support for my family | Relationships        | Therapy              |
| 16 | Support for my family | Relationships        | Therapy              |
| 17 | Surgery               | Scarring             | They're ugly (scars) |
| 18 | The future            | Self-Esteem          | This is me now       |
| 19 | Uncertainty           | Skin sensitivity     | Time                 |
| 20 | Uncertainty           | Skin sensitivity     | Time                 |
| 21 | Work                  | Skin strength        | To be touched        |
| 22 | Wound healing         | Sleep                | Toileting            |
| 23 | Wounds                | Smoking              | Touch                |
| 24 | Wounds                | Splint               | weight               |
| 25 |                       | Tightness            | What now?            |
| 26 |                       | Travel               | Why me?              |
| 27 |                       | Treatment            |                      |
| 28 |                       | Weight               |                      |
| 29 |                       | Work and education   |                      |
| 30 |                       | Wound care           |                      |
| 31 |                       |                      |                      |
| 32 |                       |                      |                      |
| 33 |                       |                      |                      |
| 34 |                       |                      |                      |
| 35 |                       |                      |                      |
| 36 |                       |                      |                      |
| 37 |                       |                      |                      |
| 38 |                       |                      |                      |
| 39 |                       |                      |                      |
| 40 |                       |                      |                      |
| 41 |                       |                      |                      |
| 42 |                       |                      |                      |
| 43 |                       |                      |                      |
| 44 |                       |                      |                      |
| 45 |                       |                      |                      |
| 46 |                       |                      |                      |
| 47 |                       |                      |                      |
| 48 |                       |                      |                      |
| 49 |                       |                      |                      |
| 50 |                       |                      |                      |
| 51 |                       |                      |                      |
| 52 |                       |                      |                      |
| 53 |                       |                      |                      |
| 54 |                       |                      |                      |
| 55 |                       |                      |                      |
| 56 |                       |                      |                      |
| 57 |                       |                      |                      |
| 58 |                       |                      |                      |
| 59 |                       |                      |                      |
| 60 |                       |                      |                      |

## Appendix 5 – The completed PCI

Insert tailored branding for PCI users/Burns services here.

Adult Burns

# Patient Concerns Inventory [PCI]

Please choose from the list of issues you would specifically like to talk about in your consultation in clinic today. You can choose more than one option (tick boxes).

### Physical and functional well-being:

- Contractures
- Daily Activities
- Dry Skin
- Energy
- Exercise
- Hand Function
- Heat Sensitivity
- Increased skin sensitivity
- Itch
- Loss of functioning
- Mobility
- Nerve Pain
- Pain
- Scarring
- Sleep
- Stiffness
- Tightness
- Weight

### Social Care and Social well-being:

- Family/Support for my family
- Finance
- Friends
- Hobbies/Interests
- Legal implications of the accident/injury
- Personal Care
- Work/Education

### Psychological, emotional and spiritual well-being:

- Acceptance
- Alcohol
- Anger
- Anxiety
- Appearance
- Body image
- Avoidance
- Comments and questions from others
- Concentration
- Confidence
- Coping
- Depression
- Emotions
- Flashbacks
- Increased awareness of danger
- Low mood
- Psychological Trauma
- Relationships
- Self esteem
- Sex
- Smoking
- The future

### Treatment related concerns:

- Camouflage
- Dressing changes
- Infection
- GP
- Medication
- Ongoing wound/scar care
- Pressure Garments
- Reconstruction
- Splints
- Support groups
- Therapy

### Other (Please State):

\_\_\_\_\_

\_\_\_\_\_

\_\_\_\_\_

\_\_\_\_\_

\_\_\_\_\_

Affix label here

Name:



1  
2  
3  
4  
5  
6  
7  
8  
9  
10  
11  
12  
13  
14  
15  
16  
17  
18  
19  
20  
21  
22  
23  
24  
25  
26  
27  
28  
29  
30  
31  
32  
33  
34  
35  
36  
37  
38  
39  
40  
41  
42  
43  
44  
45  
46  
47  
48  
49  
50  
51  
52  
53  
54  
55  
56  
57  
58  
59  
60

Insert tailored branding for PCI users/Burns services here.

The following page gives you the opportunity to highlight people you may wish to talk to. Are there any people you would specifically like to talk with either in clinic or by referral?

- Burns Surgeon
- Occupational Therapist
- Nursing Staff
- Physiotherapist
- Specialist Nurse
- Other:
- Psychologist
- .....
- Dietician

Thank you for your time. All information is confidential. We found PCI has helped patients express issues in their clinic. Please hand this is to clinic staff.

©The Burns PCI was developed in collaboration with Edge Hill University, The Mersey regional Burns Centre, The Welsh Centre for Burns, The Katie Piper Foundation and Aintree University Hospital

Name:

Affix label here

# BMJ Open

## Identifying patient concerns during consultations in tertiary burns services: Development of the adult, Burns Patient Concerns Inventory

|                                 |                                                                                                                                                                                                                                                                                                                                                                                                                                                                                                                                                                                                                                                                                                                                                                                                                                                                                                                        |
|---------------------------------|------------------------------------------------------------------------------------------------------------------------------------------------------------------------------------------------------------------------------------------------------------------------------------------------------------------------------------------------------------------------------------------------------------------------------------------------------------------------------------------------------------------------------------------------------------------------------------------------------------------------------------------------------------------------------------------------------------------------------------------------------------------------------------------------------------------------------------------------------------------------------------------------------------------------|
| Journal:                        | <i>BMJ Open</i>                                                                                                                                                                                                                                                                                                                                                                                                                                                                                                                                                                                                                                                                                                                                                                                                                                                                                                        |
| Manuscript ID                   | bmjopen-2019-032785.R2                                                                                                                                                                                                                                                                                                                                                                                                                                                                                                                                                                                                                                                                                                                                                                                                                                                                                                 |
| Article Type:                   | Original research                                                                                                                                                                                                                                                                                                                                                                                                                                                                                                                                                                                                                                                                                                                                                                                                                                                                                                      |
| Date Submitted by the Author:   | 02-Oct-2019                                                                                                                                                                                                                                                                                                                                                                                                                                                                                                                                                                                                                                                                                                                                                                                                                                                                                                            |
| Complete List of Authors:       | Gibson, John; Edge Hill University, Postgraduate Medical Institute; Abertawe Bro Morgannwg University Health Board, The Welsh Centre for Burns & Plastic Surgery<br>Yarrow, Jeremy; Abertawe Bro Morgannwg University Health Board, The Welsh Centre for Burns & Plastic Surgery<br>Brown, Liz; Abertawe Bro Morgannwg University Health Board, The Welsh Centre for Burns & Plastic Surgery<br>Evans, Janine; Abertawe Bro Morgannwg University Health Board, The Welsh Centre for Burns & Plastic Surgery<br>Rogers, Simon; Aintree University Hospitals NHS Foundation Trust; Edge Hill College, Postgraduate Medical Institute<br>Spencer, Sally; Edge Hill University, Postgraduate Medical Institute (PGMI), Faculty of Health & Social Care<br>Shokrollahi, Kayvan; Edge Hill University, Postgraduate Medical Institute; Saint Helen's and Knowsley Teaching Hospitals NHS Trust, Mersey Regional Burns Centre |
| <b>Primary Subject Heading</b>: | Patient-centred medicine                                                                                                                                                                                                                                                                                                                                                                                                                                                                                                                                                                                                                                                                                                                                                                                                                                                                                               |
| Secondary Subject Heading:      | Surgery, Communication                                                                                                                                                                                                                                                                                                                                                                                                                                                                                                                                                                                                                                                                                                                                                                                                                                                                                                 |
| Keywords:                       | Burns, Patient Concerns Inventory, Health Related Quality of Life, Patient Centred Care                                                                                                                                                                                                                                                                                                                                                                                                                                                                                                                                                                                                                                                                                                                                                                                                                                |
|                                 |                                                                                                                                                                                                                                                                                                                                                                                                                                                                                                                                                                                                                                                                                                                                                                                                                                                                                                                        |

SCHOLARONE™  
Manuscripts

1  
2  
3 **Identifying patient concerns during consultations in tertiary burns services:**  
4 **Development of the adult, Burns Patient Concerns Inventory**  
5

6 John A. G. Gibson<sup>1,2\*</sup>, Jeremy Yarrow<sup>2</sup>, Liz Brown<sup>2</sup>, Janine Evans<sup>2</sup>, Simon N. Rogers<sup>1,3</sup>,  
7 Sally Spencer<sup>1</sup>, Kayvan Shokrollahi<sup>1,4</sup>  
8  
9

- 10  
11  
12 1. Postgraduate Medical Institute, Edge Hill University, Ormskirk, UK  
13 2. The Welsh Centre for Burns & Plastic Surgery, Morriston Hospital, Swansea, UK  
14 3. Merseyside Regional Maxillofacial Unit, University Hospital Aintree, Liverpool, UK  
15 4. Mersey Regional Burns Centre, Whiston Hospital, Merseyside, UK  
16  
17  
18

19  
20 \*Corresponding Author  
21

22 Email:johnnaggibson@hotmail.com  
23  
24

25 Data Availability Statement: Due to the sensitive nature of the study and to prevent the risk  
26 of patient identification, data from the study will not be made available.  
27  
28  
29  
30  
31  
32  
33  
34  
35  
36  
37  
38  
39  
40  
41  
42  
43  
44  
45  
46  
47  
48  
49  
50  
51  
52  
53  
54  
55  
56  
57  
58  
59  
60

## Abstract

### Objectives

Identifying the issues and concerns that matter most to burns survivors can be challenging. For a number of reasons, but mainly relating to patient empowerment, some of the most pressing concerns patients may have during a clinical encounter may not naturally be the focal point of that encounter. The Patient Concerns Inventory (PCI) is a tried and tested concept initially developed in the field of head and neck cancer that empowers patients during a clinical encounter through provision of a list of prompts that allows patients to self-report concerns prior to consultation. The aim of this study was to develop a Patients Concerns Inventory (PCI) for adult burns patients.

### Design

Content for the PCI was generated from three sources: Burns Health Related Quality of Life (HRQoL) tools, thematic analysis of one-to-one interviews with twelve adult burns patients and seventeen Multi-Disciplinary Team (MDT) members. Content was refined using a Delphi consensus technique, with patients and staff members, using SurveyMonkey.

### Setting

Within outpatient secondary care.

### Participants

Twelve adult burn patients and MDT members from two regional burns centres.

### Results

A total of 111 individual items were generated from the three sources. The Delphi process refined the total number of items to 58. The main emergent domains were physical and functional well-being (18 items), psychological, emotional and spiritual well-being (22 items), social care and social well-being (7 items) and treatment-related concerns (11 items).

### Conclusions

The Adult, Burns-Specific Patient Concerns Inventory (PCI-B (adult)) is a 58-item, holistic prompt list, designed to be used in the outpatient clinic. It offers a new tool in burn care to improve communication between healthcare professionals and patients, empowering them to

1  
2  
3 identify their most pressing concerns and hence deliver a more focussed and targeted patient-  
4 centred clinical encounter.  
5  
6

7 **Keywords:** Burns; Health-Related Quality of Life, Holistic prompt list, Patient Concerns  
8 Inventory; PCI; patient-centred care.  
9  
10

### 11 **Strengths and Limitations of this study**

12  
13  
14

- 15 • The PCI offers a new tool in burn care to improve communication between healthcare  
16 professionals and patients
- 17 • The PCI – B (Adult) has been developed in accordance with international standards  
18 on Health Related Quality of Life tool development.
- 19 • Content within the PCI may not capture concerns unique to patients from other  
20 cultures, age groups, or those with other types of burns.
- 21 • Further work is required to determine the efficacy of the tool in the clinical setting.  
22  
23  
24  
25  
26  
27  
28  
29  
30  
31  
32  
33  
34  
35  
36  
37  
38  
39  
40  
41  
42  
43  
44  
45  
46  
47  
48  
49  
50  
51  
52  
53  
54  
55  
56  
57  
58  
59  
60

## Introduction

Globally, burns are the fourth most common form of trauma after road traffic accidents, falls and interpersonal violence<sup>1</sup>. In 2008, the World Health Organisation (WHO) estimated that 195,000 people died from fire-related injuries, a decrease of almost 40% in relation to 2004<sup>1</sup>. The decline in mortality has been attributed to improved knowledge of the pathophysiological response to injury and progress in intensive care, nutrition, surgical techniques and infection control<sup>3</sup>. Consequently, more patients are surviving major burn injuries and require long-term support and rehabilitation.

The need for a holistic approach to burn care is essential if the many issues that a patient may encounter such as physical symptoms, psychological issues and reduced physical function are to be fully addressed<sup>4,5</sup>. In the time-restricted outpatient setting, identifying the issues and concerns that matter most to patients can be challenging. Furthermore, it is often difficult to identify patients that 'suffer in silence' and some concerns, for example the impact of burn injuries on sexual relationships, may be potentially embarrassing or difficult for both the patient and health care professional to discuss unless there is some mechanism or prompt to facilitate this<sup>6,7</sup>. The stress and anxiety associated with attending clinic appointments, often involving extensive journeys, may also cause patients to forget to raise important issues during the consultation.

An open, communicative relationship helps patients understand their health condition, improving satisfaction, improving health outcomes and reducing patient stress<sup>8,9</sup>. Improvements in patient-professional communication have been most notable in oncology where the concept of Holistic Needs Assessment (HNA) has become an integral aspect of care<sup>10</sup>. Rogers et al. developed and piloted a Patient Concerns Inventory (PCI) to assess the needs of patient with head and neck cancer<sup>11</sup>. The PCI, is a prompt list containing potential concerns, that patients may wish to discuss with their healthcare professional. It is completed prior to consultation, and enables the clinician to focus the discussion around the individual's needs. The PCI has since been validated in rheumatology<sup>12</sup>, neuro-oncology<sup>13</sup> and breast cancer<sup>14</sup> and is associated with greater patient satisfaction, and service efficiency<sup>11,13,15-17</sup>.

The aim of this study was to develop a PCI for adult burns patients.

## Methods

The study comprised three distinct stages. Firstly, content for the PCI was generated from three sources: burns-specific health related quality of life (HRQoL) tools, one to one interviews with burns patients and focus groups with multi-disciplinary care teams (MDT) from two regional burns centres. Following this stage, items were refined using a Delphi process. The final stage of PCI development was to group items into discrete domains.

The need for both patient and professional involvement in the development of patient-focused tools is extensively documented within the literature. It is argued that such an approach is essential to ensure the tool adequately reflects the needs of the target population<sup>18-20</sup> and this approach was therefore adopted from the outset.

### 1. CONTENT GENERATION

#### a. HRQoL Tools

A systematic search of MEDLINE, the Cochrane library, Embase and PsycInfo was undertaken in June 2017 to identify HRQoL tools psychometrically validated for an adult burn population ( $\geq 18$ ). Grey literature was searched using Google Scholar and OpenGrey. The detailed search strategy is outlined in appendix 1.

Relevant items were extracted from the HRQoL measures by JAGG and independently verified by SS.

#### b. One-to-One Patient Interviews

Participants were recruited from two regional burn centres in the UK; The Welsh Centre for Burns & Plastic Surgery, Swansea and The Mersey Burns Centre, Liverpool, using the following eligibility criteria: Participants aged 18 or above, with a burn injury and actively receiving treatment. Participants unable to speak English or unable to provide informed consent were excluded.

A purposive sampling strategy was used to select participants representative of the wider burns population based on: age (18-30, 31-50, 50-65, >65), gender, mechanism of burn (scald, flame, contact, electrical and chemical), severity of burn (0-15% TBSA, >15%TBSA) and time following injury (<6 months since injury, 6 months -1 year, >1 year).

1  
2  
3 Eligible participants were identified by clinic staff and provided with participant information  
4 sheets describing the study. Those willing to participate contacted JAGG who arranged a  
5 suitable time and date for the interview. Written informed consent was provided by all  
6 participants prior to interviews, which were conducted in a confidential space in the burns  
7 centre using a semi-structured interview format. Participants were asked to describe concerns  
8 and issues encountered during the course of their recovery; the initial acute inpatient  
9 treatment (where applicable), outpatient treatment and their concerns for the future  
10 (Appendix 2).  
11  
12  
13  
14  
15  
16

17  
18 All interviews were conducted by JAGG. JAGG is a specialist registrar in Burns & Plastic  
19 Surgery and is a former burns survivor. Interviews were digitally audio-recorded and  
20 transcribed verbatim (JAGG). Data were analysed using a six step inductive thematic  
21 approach<sup>21</sup> supported by NVivo v12 software. Data collection and analysis were concurrent  
22 to enable determination of data saturation; where additional interviews did not yield new  
23 information<sup>22</sup>. Concerns described by participants were assigned unique codes and those  
24 deemed irrelevant to the PCI were excluded. Where possible, the wording of the codes was  
25 used in the language patients described their concerns. The codes that remained were the  
26 initial list of patient concerns. Coding was performed by JAGG and verified by SS who have  
27 extensive knowledge in qualitative analysis.  
28  
29  
30  
31  
32  
33  
34

### 35 36 c. Multi-Disciplinary Team (MDT)

37  
38 Staff were recruited from two regional burn centres in the UK; The Welsh Centre for Burns  
39 & Plastic Surgery, Swansea and The Mersey Burns Centre, Liverpool. The Welsh Centre for  
40 Burns & Plastic Surgery is the regional adult burns centre for the South West of the United  
41 Kingdom, covering a population of 10 million. The Mersey Burns Centre, is a regional burns  
42 centre for the North-West of the United Kingdom, covering a population of 4.5 million. Both  
43 services contain a dedicated burns MDT providing all aspects of burn care.  
44  
45  
46  
47  
48

49 Staff were eligible if they were a dedicated member of the burns MDT and had been working  
50 in burn care for a minimum of one year. Informed consent was obtained from all staff  
51 participants. Items harvested in stage a) were reviewed by members of the MDT who then  
52 added additional items. Concerns devised from patients in stage b) were not shared with the  
53 MDT to enable comparison between groups.  
54  
55  
56  
57  
58  
59  
60



## 2. CONTENT REFINEMENT

Incorporating every concern identified would have been extensive, placing a high burden on patients and staff in terms of completion time and analysis, therefore not feasible in the confines of an outpatient clinic<sup>20 22</sup>. Content reduction was therefore necessary at this stage to remove similar items and to achieve consensus on the final item list. Development of other versions of the PCI have confirmed that a checklist of 50-100 items is feasible in the outpatient setting<sup>11-13</sup>. An item bank was compiled from the three aforementioned sources; HRQoL tools, patient interviews and the MDT. An online Delphi process using SurveyMonkey software<sup>23</sup> was used to reduce and refine the item bank. To maintain stakeholder validity, both healthcare professionals and patients who participated in content generation were invited to take part. Participants were asked to select items for inclusion in the final PCI and to add additional items considered missing. Items with less than a 60% selection rate were excluded from the final PCI. The survey was repeated and items with a 60% agreement were retained in the final list of concerns. This level of consensus has been shown to be effective in previous versions of the PCI<sup>11-13</sup>.

A secondary outcome of the Delphi study was to gain feedback on the wording of individual items on the PCI. Significant overlap was generated from the three sources of content development. All items generated, included those that had similar definitions (e.g energy and fatigue) were included in the Delphi. Participants were asked to review the wording of the items to ensure that the list was deemed comprehensive by the intended audience and to select the term they considered most appropriate.

## 3. ITEM DOMAINS

The purpose of this stage was to group similar aspects of health together to help patients focus on one topic at a time when completing the PCI. The final list of concerns were allocated to one of the four following domains:

1. Physical and functional well-being.
2. Psychological, spiritual and emotional well-being.
3. Social care and social well-being.
4. Treatment related concerns.

These four domains feature on other versions of the PCI and are consistent with the domains of other general and disease specific HRQoL measures<sup>24</sup>. They were therefore deemed

1  
2  
3 appropriate for the adult burns PCI. A further Delphi process, using SurveyMonkey, was  
4 used to allocate items to domains based on 60% consensus from MDT staff.  
5  
6

#### 7 PATIENT AND PUBLIC INVOLVEMENT 8

9  
10 A patient and public involvement session was hosted by the Katie Piper Foundation. This  
11 informal focus group highlighted the disparity between issues considered important by health  
12 professionals managing care and patients receiving care. Patient feedback was used to design  
13 the study and aid with patient recruitment.  
14  
15  
16

#### 17 ETHICAL APPROVAL 18

19  
20 The study was approved by the Health Research Authority North West - Greater Manchester  
21 Central Research Ethics Committee 17/NW/0297 IRAS ID 214597 in May 2017 prior to the  
22 commencement of the study.  
23  
24  
25  
26  
27  
28  
29  
30  
31  
32  
33  
34  
35  
36  
37  
38  
39  
40  
41  
42  
43  
44  
45  
46  
47  
48  
49  
50  
51  
52  
53  
54  
55  
56  
57  
58  
59  
60

## RESULTS

A diagram displaying an overview of the three stages of tool development alongside the number of concerns generated is shown in Figure 1 – An overview of study design.

### CONTENT GENERATION

#### a. HRQoL tools

The search identified seven HRQoL tools. Five were disease specific; the Burn Specific Health Scale-Brief (BSHS-B)<sup>25</sup>, The Young Adult Burn Outcome Questionnaire (YABOQ)<sup>26</sup>, Burn Specific Pain Anxiety Scale (BSPSAS)<sup>27</sup>, The Patient Observer Scar Assessment Scale (POSAS)<sup>28</sup>, The Satisfaction With Appearance Scale (SWAP)<sup>29</sup>. Two were generic; EQ 5D<sup>30</sup> and SF 36<sup>31</sup>. Forty-nine items were harvested from the seven measures (Appendix 3).

#### b. One to One Interviews

Twelve face-to-face interviews lasting for average of 46 minutes (20-85 mins) were conducted between August and September 2018. Saturation was determined as interviews number 11 and 12 did not lead to the emergence of any new codes. This was independently assessed by SS.

Population demographics are shown in Table 1.

**Table 1 Patient demographics**

|                                       |                     |
|---------------------------------------|---------------------|
| Patients, N                           | 12                  |
| Age (yrs), mean (S.D), range          | 47.9 (12.3), 28-60  |
| Male, N                               | 7                   |
| Female, N                             | 5                   |
| White British                         | 12                  |
| Years since injury, mean (S.D), range | 13.3 (23.1), 0.8-53 |
| Percentage TBSA, mean (S.D), range    | 24 (29.4), 1 -80    |
| Aetiology                             |                     |
| Contact burn, N                       | 2                   |
| Chemical burn, N                      | 1                   |
| Electrical burn, N                    | 1                   |
| Flame burn, N                         | 5                   |
| Flash burn, N                         | 2                   |
| Scald burn, N                         | 1                   |
| Contractures, N                       | 4                   |
| Presence of scarring, N               | 9                   |
| Type of scarring                      |                     |
| Pigmented, N                          | 5                   |
| Hypertrophic, N                       | 6                   |
| Location of scarring                  |                     |
| Head & Neck, N                        | 5                   |
| Upper Limb, N                         | 7                   |
| Lower Limb, N                         | 4                   |
| Torso, N                              | 6                   |
| Surgical intervention, N              | 7                   |

S.D –Standard Deviation

1  
2  
3 TBSA: Total Body Surface Area

4 A total of 97 individual codes were generated from the 12 interviews. Following removal of  
5 forty duplicate and similar items, 57 concerns remained. . Where possible, the wording of the  
6 concerns and issues outlined below, reflected the language used by the patients interviewed.  
7  
8  
9

## 10 **Items Generated**

### 11 **Physical concerns relating to wounds and Scars**

12  
13 All twelve participants expressed concerns about potential scarring, though only nine had  
14 developed scars. When specifically probed about the physical appearance of scars, patients  
15 did not focus on specific features, such as the colour or texture; they were more concerned  
16 with overall appearance and the impact of scarring on other aspects of physical health and  
17 well-being, such as mobility. The following concerns were identified in relation to wounds  
18 and scars.  
19  
20  
21  
22  
23  
24  
25

26  
27 Pain was an overriding concern for all participants, at multiple time points of their recovery.

28 *“I don’t remember what normal felt like...it sounds really stupid to say but a year has gone  
29 and I don’t know what it’s like to not be in pain.”* (Participant 8)  
30  
31  
32

33  
34 Nerve (neuropathic) pain was described separately by three patients and therefore considered  
35 a separate concern. The wording of “Nerve pain” was selected as this was the common  
36 language that patients described their symptoms.  
37  
38  
39

40  
41 Mobility was a concern raised by eight participants, such as an inability to perform routine  
42 day to day activities, arising from movement restriction, pain or skin sensitivity.

43 *“The initial part from laying down to sitting up to getting off the bed was really hard across  
44 the back [Patient had burn wounds to the back]. It was so painful, it was really hard.”*  
45  
46  
47

48 (Participant 11)

49  
50 Hand function was a concern expressed by all six participants that had injuries to the hand  
51 and upper limb. For one builder this issue severely limited his ability to work:  
52  
53

54 *“I still can’t grip with this one, [Lifts dominant left hand] that’s my grip [attempts to grip the  
55 investigators pen with limited success]. But it’s like stupid things, like I can’t hold a nail. I  
56 hold a nail and me arm shakes. I can’t hold a screw.”* (Participant 8)  
57  
58  
59  
60

1  
2  
3 Skin strength was a concern for five participants. For one participant, a self-employed  
4 mechanic, it had a substantial impact on his work:

5  
6 *“I’ve noticed a few times now that when I cut my hands on something, when you’re working,*  
7 *it opens the skin up quite easily. Whereas before it may have caused a scratch, now it’s a big*  
8 *problem.”*  
9 (Participant 2)

10  
11  
12  
13 Scar tightness was a concern for all nine participants that had scarring. For six patients this  
14 was related to mobility limitation and captured above, but for three participants, scar  
15 tightness was associated with discomfort rather mobility issues.

16  
17  
18 *“The groin is quite tight. It’s like I’ve got a pair of knickers on that are four sizes too small.”*  
19 (Participant 7)

20  
21  
22 Scar tightness was also a concern for patients with abdominal scarring during pregnancy.

23 Weight gain was a concern for four patients, arising from reduced mobility and excessive  
24 calorie intake. The excess weight increased participant’s dissatisfaction with their appearance  
25 and increased scar tightness resulting in additional discomfort.

26  
27  
28 Skin sensitivity was a concern for most of the interviewees, including itching during wound  
29 healing (four participants), scar sensitivity (six participants) and heat sensitivity (five  
30 participants).

31  
32  
33 *“When I got the slightest touch, I would just have to move.”*  
34 (Participant 6)

### 35 36 37 38 **Physical concerns not related to scars**

39 Concerns about other aspects of physical function included, sleep deprivation (seven  
40 participants), loss of appetite (four participants) and fatigue during the initial recovery stage  
41 (six participants), and lack of energy (four participants).

42  
43  
44 *“It’s a different tired to when you’re not getting sleep.”*

45  
46  
47 (Participant 2)

### 48 49 **Body image**

50 Physical appearance and body image was an important concern for all participants.

51  
52  
53 *“I still want nice normal skin. I want to look in a mirror and not see this burned flesh that*  
54 *stays with me all the time.”*  
55 (Participant 7)

1  
2  
3 As a direct consequence of scarring, nine participants described anxiety associated with  
4 acceptance by society. Five participants described a lack of confidence and low self esteem  
5 following the injury.  
6  
7

8 *“I just felt like nothing. I’m now very happy with my life but it [the injury] made me feel ugly*  
9 *and worthless.”* (Participant 7)  
10  
11

12  
13 Comments from others were of great concern throughout the recovery process for all twelve  
14 participants. Three patients reported bullying and another described discrimination in the  
15 workplace owing to scarring.  
16  
17

18 *“If I were to walk into a pub with you I would be the topic of conversation because I’m*  
19 *different. I see that and I feel that.”* (Participant 5)  
20  
21  
22

### 23 24 **Coping Strategies**

25  
26 Coping with the psychological sequelae of the injury was a concern for seven of the  
27 participants. Coping mechanisms such as increased alcohol consumption and smoking were  
28 concerns for two participants and avoidance of reminders were described by seven  
29 participants. For some, this impacted upon daily functioning.  
30  
31  
32

33  
34 *“The stove is still a no go for me. I’m back in the kitchen doing butties and things like that*  
35 *but putting things on the stove I’m still a bit shaky.”* (Participant 6)  
36  
37

38 Fear for the future and anger were other negative coping strategies described by participants  
39

40 *“I get angry now when I talk about it because I used to get a bit sad and a bit feeling down*  
41 *but I can’t now, I just get.... It’s like a rage that comes over me. No, I can’t work it out.”*  
42  
43

44 (Participant 4)  
45

### 46 **Mental health**

47  
48 Anxiety was encountered by five participants, causing considerable repercussions.  
49

50  
51 *“I’m suffering a lot from panic attacks, anxiety, really, really badly. There’s mornings now*  
52 *where I have to really argue with myself to actually wake up and go to work.”*  
53  
54

55 (Participant 8)  
56

57 Depression was experienced by five participants and low mood by eight.  
58

59 *“It would change my mood. It would bring me down and I’m not a person that’s down”*  
60

(Participant 2)

Participants described low mood to avoid the perceived stigma associated with mental health conditions. One participant described the impact of appropriate terminology:

*“If you say that people need help with their well-being and their full recovery, which means physical and mental in every sense, emotional and so on, that is better than implying that people must have mental health problems because they’ve been through a trauma. That would draw in a wider set of people who [wanted or needed] some kind of mental health support.”*

(Participant 9)

Dependence on others and guilt were described by seven and six patients respectively. Guilt was experienced mostly by patients who, witnessed other survivors with more severe injuries.

*“I felt ashamed and embarrassed and horrible and dirty and guilty because I’m alive really.”*

(Participant 7)

### **PTSD symptomology**

Seven participants suffered flashbacks of the injury event.

*“I would have the odd flashback. I try not to think about it ... as they were really bad.”*

(Participant 2)

Six participants described broad concerns and issues relating to their psychological and emotional well-being that could not be defined by any of the above themes. The term psychological trauma was used as the code. One patient who was assaulted, developed depression and PTSD:

*“I’ve had to stop thinking about it, because the more I was trying to think about why they did it, I was getting nowhere, ... but when I look at my arm sometimes, [the scar] it just triggers it again.”*

(Participant 8)

### **Social Well-Being**

All twelve participants were concerned about the impact of the injury on their intimate, personal and social relationships. Four participants raised specific concerns about intimacy.

*“Intimacy is awkward, you know... we still have a loving relationship but it’s not what it was before the accident. It was quite hard to come to terms with.”*



(Participant 4)

All participants were concerned about the impact of their injury on family members. Concerns related to the psychological trauma experienced by members of the family who witnessed the trauma:

*“My son was screaming, I mean he must have seen me on fire.”* (Participant 1)

Both physical and psychological aspects of the injury prevented six participants from continuing their regular hobbies and interests. Returning to work and education following the injury were concerns raised by ten participants. The financial implications of the injury were far reaching and perceived as an issue for six patients. For one participant, it was perceived as the most difficult aspect of the injury.

*“Financial that’s been.... If I’m honest with you, I’ve found that worse than the pain.”*

(Participant 8)

### **Treatment Related Concerns**

All twelve participants expressed concerns about good communication with the clinical team in relation to their treatment. Communication was perceived as poor when patients did not feel that their needs were identified or addressed, leading to significant distress.

*“Some went “don’t you worry we’re doing what we can” kind of thing. So what are you doing? What is the plan? I kind of got the impression that had we not pushed, they wouldn’t have explained.”* (Participant 9)

On the other hand, excellent communication inspired greater confidence in the competence of healthcare professionals. In instances where treatment options were not available for particular issues, patients appreciated honesty.

*As an adult now, he’s helped me understand. It’s like he can do little bits to tidy me up. I think that I don’t want to accept it. He can’t get rid of it all but he can make me better. So I feel valued as a person not like the other consultants. It can do a lot of damage. It really can.*

(Participant 7)

In the early stages of recovery, patients had numerous concerns relating to wound care and infection.

1  
2  
3 “Well with the wound healing, what it was was the infection. Because of the smell I was  
4 constantly worrying that the work they [healthcare professionals] had done was wasted and  
5 that I would be back [in hospital] getting something else done.” (Participant 6)  
6  
7  
8  
9

10  
11 Once wounds had healed, the majority of concerns related to scar treatment options, notably  
12 pressure garments, splints, reconstruction and camouflage.  
13

14  
15 Four participants raised numerous concerns about the primary care (General Practitioner)  
16 team’s knowledge of burns injuries.  
17

18  
19 “I felt quite vulnerable because they didn’t have the [specialist] knowledge. I don’t think  
20 there is a lot of knowledge [about] burns, I really don’t.”  
21

22  
23 (Participant 12)  
24

25 An aspect of care that four participants felt was missing was support for family members,  
26 especially parents of young children. For one participant, who was assaulted, this was a  
27 significant concern.  
28

29  
30  
31 “There’s been no support offered for my kids. Even if it’s just to talk to somebody...”  
32

33 (Participant 8)  
34  
35  
36

### 37 c. Multi-Disciplinary Team

38  
39 Data collection was performed between September and October 2018. Seventeen members of  
40 the clinical teams from the two centres contributed to item generation, which identified 54  
41 potential concerns. Composition of the MDT is shown in table 2, with the list of concerns  
42 displayed in Appendix 4. The wording of items were devised by each staff member.  
43  
44  
45

46  
47 **Table 2 MDT members**

| Professional                     | Number |
|----------------------------------|--------|
| Consultant Burns Surgeon         | 3      |
| Consultant Anaesthetist          | 2      |
| Consultant Clinical Psychologist | 3      |
| Physiotherapist                  | 3      |
| Occupational Therapist           | 2      |
| Staff Nurse                      | 4      |

### **Content Generation: variation between sources**

Whilst specific wording of concerns varied between the literature, patients and MDT sources, there was significant overlap and consistency in the content of the four domains (Appendix 5). There were also differences between the sources, with each contributing unique concerns, reinforcing the validity and importance of capturing multiple professional and patient perspectives during content generation.

For the physical and functional well-being domain, the concerns identified were largely consistent across all three sources. However, there were a few exceptions. Skin strength and dental health were concerns unique to patients. Dry skin, contractures and specific scar characteristics (shape, size and texture) were identified in the HRQoL tools and by members of the MDT but not during the patient interviews.

For the psychological, emotional and spiritual well-being domain, acceptance by society was a concern only raised by patients. Hypervigilance/increased awareness of danger, was not identified in the HRQoL tools. Change of personality was a concern identified by a member of the MDT, but this concern was not raised by patients.

For the social care and social well-being domain, concerns about driving were only raised by patients whereas religion, and responses by friends and family were identified by the MDT and HRQoL tools.

For the treatment related concerns domain, medication and the management of infection were concerns raised only by patients.

## CONTENT REFINEMENT

After removal of duplicate items, a total of 111 individual concerns, generated from the literature, patient interviews and the MDT were incorporated in the Delphi survey. Nine of the twelve (75%) patients that participated in the one to one interviews participated in the survey. Seventeen members of the MDT's at the two sites participated in the Delphi survey.

Fifty-eight items achieved a 60% consensus agreement following the two rounds of the Delphi survey and were retained for the inventory.

## GROUPING ITEMS IN DOMAINS

Five staff members independently allocated the final 58 concerns into one of the following four domains, which were previously identified from other versions of the PCI: physical and functional well-being (18 concerns); psychological, spiritual and emotional well-being (22 concerns); social care and social well-being (7 concerns); treatment related concerns (11 concerns). Categorisation of the final 58 concerns is shown in the Adult Burns Patients Concerns Inventory (Appendix 6).

## Discussion

The Adult Burns Patient Concerns Inventory is a 58-item prompt list that empowers patients to raise issues that are of greatest concern to them, which facilitates care providers to focus on these patient priorities. This study has captured the most important concerns experienced during recovery as perceived by patients and healthcare professionals, providing a tool that has shown to improve communication between patients and healthcare professionals in other healthcare settings, and has similar potential in the context of burn care.

In addition to the development of a new tool, this study has identified a number of other key findings. There was substantial overlap between the concerns raised by staff and patients. However, there were also notable differences. Staff raised issues and selected items that were more clinically driven whereas patients raised and selected issues that had an influence on their daily lives. Each source of content provided unique issues. Skin strength, infection, medication, dental health, acceptance and driving were concerns unique to the patient participants. On the other hand, scar characteristics, religion, personality, dry skin, contractures, friend's response and family's response were unique to HRQoL tools and the MDT. The importance of capturing concerns from both sides of the clinical consultation are demonstrated in the final PCI; five of these concerns appear on the PCI. This study has demonstrated that burns patients experience a wide range of concerns relating to their physical and functional well-being. Concerns raised by the majority of patients such as pain, itch, sleep, and increased sensitivity are well described in the literature<sup>4 32-37</sup>. Concerns that were less prevalent however, are not well described. Dental health for instance, a concern for two individuals, is absent in the burns literature.

All patients raised concerns about scarring that impacted upon all four domains of the PCI. The physical appearance of scars, such as colour and texture, were considered important during development of the POSAS HRQoL tool<sup>28</sup> and therefore included during content generation, but patients in our study were more concerned about the overall appearance and functional limitations associated with scarring, and scar features were not retained during the Delphi exercise. This is consistent with findings from the PEGASUS qualitative study where patients also focused on the general appearance of scars<sup>38</sup>. Our findings may indicate that the detailed characteristics of scars may be important when assessing the efficacy of clinical interventions, but are not of specific concern to patients. Scar characteristics were however deemed important in a study, performed by Kool et al.<sup>39</sup>. The mixed method study aimed to

1  
2  
3 determine a hierarchical structure of HRQoL domains identified from a cohort of adult burns  
4 patients. The differences in these findings could be attributed to a different study population  
5 or the sample size in this present study. The discrepancies highlight the heterogeneity of  
6 concerns within the adult burns population and the need to hear each patient's voice.  
7  
8  
9

10  
11 The psychological, emotional and spiritual well-being domain contains more items than any  
12 other in the PCI. Many patients described these concerns as having greater and longer lasting  
13 impact than any other aspect of their injury and the central theme related to body image.  
14 Persistent psychological symptoms, such as flashbacks and fear avoidance, relating to the  
15 injury event were also prevalent. Patients in this study were not assessed for Post-Traumatic  
16 Stress Disorder (PTSD) but their psychological concerns may align with the symptomatic  
17 profile of PTSD, which emphasises cognitive features such as the negative appraisal of  
18 traumatic events and its central role in the maintenance of psychological distress<sup>40 41</sup>. Many  
19 patients described their scarring as a constant reminder of their injury, which supports the  
20 growing evidence that appearance distress and PTSD symptomology are interlinked in  
21 patients with visible disfigurement<sup>42</sup>. Psychological interventions aimed at addressing PTSD  
22 symptoms therefore need to simultaneously identify and address concerns relating to body  
23 image.  
24  
25  
26  
27  
28  
29  
30  
31  
32  
33

34 Stigma associated with mental health disorders is associated with poor self-esteem, self-  
35 confidence and reluctance to seek care<sup>43 44</sup>. Patients in our study were also concerned about  
36 the negative connotations and potential stigmatisation associated with mental health support.  
37 Further work is required to identify patient friendly terminology for psychological support  
38 and to address the stigma associated with mental health disorders in the burns population.  
39  
40  
41  
42  
43

44 Concerns identified for the domain of social care and social well-being were more consistent  
45 across the three sources used for content generation compared to the other PCI domains. The  
46 importance of social support for improving outcomes for burn survivors is well established<sup>45</sup>  
47<sup>46</sup> but less is known about the impact on families. All patients were concerned about  
48 significant psychological distress observed in spouses, family and friends, following the burn  
49 trauma, many of whom had witnessed the injury. This is consistent with evidence from one  
50 study that reported clinical anxiety, depression or PTSD-related symptoms in 77% of spouses  
51 and 56% of close relatives immediately following injury<sup>45</sup>. However, the study did not  
52 include long-term follow-up of relatives, therefore the long-term trajectory of psychological  
53 distress in relatives and its relationship to the long term psychological state of the patient  
54  
55  
56  
57  
58  
59  
60

1  
2  
3 remain unclear. Psychological support for family members was the only aspect of care that  
4 patients felt was missing. Further research is needed on the prevalence of mental health  
5 conditions in family members and its impact on survivor recovery. Treatment-related  
6 concerns tended to focus on burden, such as the number of appointments, number of  
7 operations, the number of prescribed medicines and their side effects, the impact of treatment  
8 on the family (such as childcare), time off work and the financial cost of attending  
9 appointments. The majority of patients accepted the necessity of treatment for their recovery.  
10 However, patients with extensive injuries were concerned about the impact of treatment in  
11 delaying reintegration into society. This is consistent with the significant impact of treatment  
12 burden reported in a recent qualitative study<sup>38</sup>, but further research is required to explore this  
13 in further detail.  
14  
15  
16  
17  
18  
19  
20  
21  
22

23 There is significant overlap with the findings of this study and those reported by Kool et al  
24 indicating the validity of the findings<sup>39</sup>. The study identified two key distinctions in HRQoL,  
25 resilience and vulnerability. Vulnerability included five domains; psychological, economic,  
26 social, physical and intimate/sexual. Resilience incorporated positive coping and social  
27 sharing.  
28  
29  
30  
31

32 Similar to our study, functional limitations and issues with scarring were the predominant  
33 aspects of the physical domain. Likewise, negative emotions, body perception and trauma  
34 related symptoms, cognitive problems were central to the psychological domain. Social  
35 aspects such as intimacy, finance and work were also predominant. Unique issues such as  
36 medication, their side effects and aspects relating to treatment burden were also considered  
37 important by participants. As described above, discrepancies between the two studies were  
38 observed with the physical characteristics with scarring, which indicate the importance of  
39 assessing the needs of patients on an individual basis.  
40  
41  
42  
43  
44  
45  
46

47 The greatest potential limitation of this study, and similar HNA and HRQoL tools, is  
48 representativeness of the sampled patient population<sup>20</sup>. Whilst the purposive sampling  
49 strategy aimed to capture the underlying population, it did not cover the full demographic or  
50 clinical spectrum. Notably: all of the participants were white British, non-English speaking  
51 patients were excluded, and the age range did not include younger (under 28) and older (over  
52 60) patients. In addition, less common injuries such as frostbite were not included in the  
53 injury profile. It is therefore possible that the PCI does not capture concerns unique to  
54 patients from other cultures, age groups, or those with other types of burns. Once feasibility  
55  
56  
57  
58  
59  
60



1  
2  
3 and acceptability of the Adult Burn PCI has been established, further validation work will  
4 help to establish its relevance for other populations not included in this study – and perhaps a  
5 version ‘two- point-zero’ in years hence along similar lines to the progression of other  
6 patient-centric tools including POSAS <sup>28</sup>.  
7  
8  
9

10  
11 A further limitation of the Adult Burn PCI is the use of single words (e.g. Itch) or short  
12 phrases (e.g. Loss of functioning). Whilst this facilitates inclusion of a broad range of  
13 concerns without over-burdening patients, the selected terms may not fully encapsulate the  
14 specifics of the issue that the patient wishes to talk about. However, the addition of a free text  
15 option allows patients to raise additional concerns and this information could be used to  
16 further refine the content.  
17  
18  
19  
20  
21

22 The next stage of validation for the Adult Burn PCI is to determine the feasibility and  
23 acceptability of the tool in a clinical setting and to optimise the mode of administration, for  
24 example paper and pencil, portable devices such as smartphones and internet-based platforms  
25 <sup>11 47</sup>. Once feasibility has been established, a comparative study is required to determine  
26 whether the PCI improves patient/consultant communication and clinical outcomes compared  
27 to standard practice.  
28  
29  
30  
31  
32

### 33 **Conclusions**

34  
35 We have developed the Adult Patient Concerns Inventory for Burns (PCI-B). Through this  
36 process, we believe burns survivors will be empowered to guide clinicians towards their most  
37 pressing needs, and to better navigate the numerous potential problems they encounter. The  
38 PCI-B as published in this paper can be freely used and re-branded so long as the content is  
39 not altered and the acknowledgements are retained.  
40  
41  
42  
43  
44

### 45 **Acknowledgements**

46  
47 We would like to thank all patients and staff from the Mersey Regional Burns Centre,  
48 Whiston Hospital and subsequently The Welsh Centre for Burns and Plastic Surgery,  
49 Morryston Hospital for their participation in the study. We would like to thank Miss Bethan  
50 Hughes, RuthAnn Fanstone and Ezinna Rospigliosi of the Katie Piper Foundation for their  
51 invaluable input into the early stages of the PCI development. We would like to acknowledge  
52 and thank the Katie Piper Foundation for part-funding the study.  
53  
54  
55  
56  
57  
58

### 59 **Funding Statement:**



1  
2  
3 This work was supported by The Katie Piper Foundation.  
4

5  
6 **Competing Interests Statement:**  
7

8 The authors declare no conflicts of interest.  
9

10  
11 **Authors Contribution**  
12

13 **JAGG** - Designed the study, conducted and analysed the literature review, patient interviews  
14 and the Delphi process. JAGG also wrote the early draft of the manuscript.  
15

16  
17 **JY** – Contributed relevant clinical evidence (burns Surgery) and assisted with patient  
18 recruitment.  
19

20  
21 **LB**- Contributed relevant clinical evidence (burns nursing) and assisted with patient  
22 recruitment.  
23

24  
25 **JE** - Contributed relevant clinical evidence (burns Occupational Therapy) and assisted with  
26 patient recruitment.  
27

28  
29 **SS** – Assisted JAGG with study design, independently conducted data analysis and assisted  
30 with supervised manuscript preparation.  
31

32  
33 **SR** – Conceived the initial PCI and provided extensive support for study design.  
34

35  
36 **KS** - Conceived the idea of a Burns-PCI and presented the idea, encouraged JAGG  
37 to investigate the presented idea, applied for and acquired funding for this research  
38 and contributed relevant clinical evidence (burns surgery). The majority of patients  
39 involved in the study were under the care of KS, whom afforded access to and  
40 assisted with patient recruitment, supervised manuscript preparation and editing,  
41 responses to peer-review comments, and final proof-reading of the manuscript. All  
42 authors discussed the results, provided a critical appraisal and contributed to the final  
43 manuscript.  
44  
45  
46  
47  
48  
49  
50  
51  
52  
53  
54  
55  
56  
57  
58  
59  
60

All authors discussed the results, provided a critical appraisal and contributed to the final manuscript.

## References

1. World Health Organisation. Global Burden of Disease. Switzerland: World Health Organization Press 2004:1-160.
2. World Health O. WHO | Burns: World Health Organization, 2017.
3. Gibson JAG, Spencer S, Rogers SN, et al. Formulating a Patient Concerns Inventory specific to adult burns patients: learning from the PCI concept in other specialties. *Scars, Burns & Healing* 2018;4:2059513118763382. doi: 10.1177/2059513118763382
4. Stavrou D, Weissman O, Tessone A, et al. Health Related Quality of Life in burn patients - A review of the literature. *Burns* 2014;40(5):788-96. doi: <http://dx.doi.org/10.1016/j.burns.2013.11.014>
5. Van Loey NE, Van Son MJ. Psychopathology and psychological problems in patients with burn scars: epidemiology and management. *American journal of clinical dermatology* 2003;4(4):245-72. doi: 444 [pii]
6. Connell KM, Phillips M, Coates R, et al. Sexuality, body image and relationships following burns: analysis of BSHS-B outcome measures. *Burns* 2014;40(7):1329-37. doi: <https://dx.doi.org/10.1016/j.burns.2014.01.006>
7. Piccolo MS, Gragnani A, Daher RP, et al. Burn Sexuality Questionnaire: Brazilian translation, validation and cultural adaptation. *Burns* 2013;39(5):942-9. doi: <https://dx.doi.org/10.1016/j.burns.2012.10.012>
8. Greenfield S, Kaplan SH, Ware JE, Jr., et al. Patients' participation in medical care: effects on blood sugar control and quality of life in diabetes. *Journal of General Internal Medicine* 1988;3(5):448-57. [published Online First: 1988/09/01]
9. Griffin SJ, Kinmonth AL, Veltman MW, et al. Effect on health-related outcomes of interventions to alter the interaction between patients and practitioners: a systematic review of trials. *Annals of family medicine* 2004;2(6):595-608. doi: 10.1370/afm.142 [published Online First: 2004/12/04]
10. Coulter A, Collins A. Making Shared Decision Making a Reality: No decision about me, without me. London: The King's Fund 2011.
11. Rogers SN, El-Sheikha J, Lowe D. The development of a Patients Concerns Inventory (PCI) to help reveal patients concerns in the head and neck clinic. *Oral Oncol* 2009;45(7):555-61. doi: 10.1016/j.oraloncology.2008.09.004
12. Ahmed A, Rogers S, Bruce H, et al. Development of a rheumatology-specific patient concerns inventory (PCI) and its use in the rheumatology outpatient clinic setting. *Annals of the Rheumatic Diseases* 2015;74(4):315-16.
13. Rooney AG, Netten A, McNamara S, et al. Assessment of a brain-tumour-specific Patient Concerns Inventory in the neuro-oncology clinic. *Supportive care in cancer : official journal of the Multinational Association of Supportive Care in Cancer* 2014;22(4):1059-69. doi: 10.1007/s00520-013-2058-2 [doi]
14. Kanatas A, Lowe D, Velikova G, et al. Issues patients would like to discuss at their review consultation in breast cancer clinics - A cross-sectional survey. *Tumori* 2014;100(5):568-79.
15. 10.1111%2Fj.1524 4725.2006.32169.x.

16. Ahmed AE, Lowe D, Kirton JA, et al. Development of a Rheumatology-specific Patient Concerns Inventory and Its Use in the Rheumatology Outpatient Clinic Setting. *The Journal of rheumatology* 2016;43(4):779-87. doi: <https://dx.doi.org/10.3899/jrheum.150068>
17. Ghazali N, Roe B, Lowe D, et al. Patients concerns inventory highlights perceived needs and concerns in head and neck cancer survivors and its impact on health-related quality of life. *The British journal of oral & maxillofacial surgery* 2015;53(4):371-9. doi: <https://dx.doi.org/10.1016/j.bjoms.2015.01.022>
18. Aaronson N, Alonso J, Burnam A, et al. Assessing health status and quality-of-life instruments: attributes and review criteria. *Qual Life Res* 2002;11(3):193-205. [published Online First: 2002/06/21]
19. Cano SJ, Browne JP, Lamping DL. Patient-based measures of outcome in plastic surgery: current approaches and future directions. *British Journal of Plastic Surgery* 2004;57(1):1-11.
20. Cano SJ, Hobart JC. The problem with health measurement. *Patient preference and adherence* 2011;5():279-90. doi: 10.2147/PPA.S14399
21. Braun V, Clarke V. Using thematic analysis in psychology. *Qualitative Research in Psychology* 2006;3(2):77-101. doi: 10.1191/1478088706qp063oa
22. Brod M, Tesler LE, Christensen TL. Qualitative research and content validity: developing best practices based on science and experience. *Qual Life Res* 2009;18(9):1263-78. doi: 10.1007/s11136-009-9540-9 [published Online First: 2009/09/29]
23. SurveyMonkey. SurveyMonkey n.d [Available from: [www.surveymonkey.com](http://www.surveymonkey.com) accessed 19th September 2016.
24. Griffiths C, Guest E, White P, et al. A Systematic Review of Patient-Reported Outcome Measures Used in Adult Burn Research. *Journal of Burn Care & Research: Official Publication of the American Burn Association* 2017;38(2):521-45. doi: 10.1097/BCR.0000000000000474
25. Kildal M, Andersson G, Fugl-Meyer A, et al. Development of a brief version of the Burn Specific Health Scale (BSHS-B). 2001;51(4):740-6.
26. Ryan CM, Schneider JC, Kazis LE, et al. Benchmarks for multidimensional recovery after burn injury in young adults: The development, validation, and testing of the american burn association/shriners hospitals for children young adult burn outcome questionnaire. *Journal of Burn Care and Research* 2013;34(3):e121-e42. doi: <http://dx.doi.org/10.1097/BCR.0b013e31827e7ecf>
27. Taal LA, Faber AW. The burn specific pain anxiety scale: introduction of a reliable and valid measure. *Burns* 1997;23(2):147-50. [published Online First: 1997/03/01]
28. Draaijers LJ, Tempelman FRH, Botman YAM, et al. The patient and observer scar assessment scale: a reliable and feasible tool for scar evaluation. *Plastic and Reconstructive Surgery* 2004;113(7):1967.
29. Lawrence JW, Heinberg LJ, Roca R, et al. Development and validation of the Satisfaction With Appearance Scale: Assessing body image among burn-injured patients. *Psychological Assessment* 1998;10(1):64-70. doi: 10.1037/1040-3590.10.1.64
30. EuroQol. EuroQol - a new facility for the measurement of health-related quality of life. *Health policy* 1990;16(3):199-208. doi: 10.1016/0168-8510(90)90421-9
31. Ware JE, Jr., Sherbourne CD. The MOS 36-item short-form health survey (SF-36). I. Conceptual framework and item selection. *Med Care* 1992;30(6):473-83.
32. Anzarut A, Chen M, Shankowsky H, et al. Quality-of-life and outcome predictors following massive burn injury. *Plast Reconstr Surg* 2005;116(3):791-7. [published Online First: 2005/09/06]

- 1  
2  
3  
4  
5  
6  
7  
8  
9  
10  
11  
12  
13  
14  
15  
16  
17  
18  
19  
20  
21  
22  
23  
24  
25  
26  
27  
28  
29  
30  
31  
32  
33  
34  
35  
36  
37  
38  
39  
40  
41  
42  
43  
44  
45  
46  
47  
48  
49  
50  
51  
52  
53  
54  
55  
56  
57  
58  
59  
60
33. Pan R, Egberts MR, Nascimento LC, et al. Health-Related Quality of Life in adolescent survivors of burns: Agreement on self-reported and mothers' and fathers' perspectives. *Burns* 2015;41(5):1107-13. doi: <https://dx.doi.org/10.1016/j.burns.2014.12.011>
  34. van Laarhoven AI, Ulrich DJ, Wilder-Smith OH, et al. Psychophysiological Processing of Itch in Patients with Chronic Post-burn Itch: An Exploratory Study. *Acta Derm Venereol* 2016;96(5):613-8. doi: <https://dx.doi.org/10.2340/00015555-2323>
  35. Van Loey N, Bremer M, Faber AW, et al. Itching following burns: epidemiology and predictors. *British Journal of Dermatology* 2008;158(1):95-100. doi: doi:10.1111/j.1365-2133.2007.08278.x
  36. Van Loey NE, Faber AW, Taal LA. Do burn patients need burn specific multidisciplinary outpatient aftercare: research results. *Burns* 2001;27(2):103-10.
  37. van Loey NE, van Beeck EF, Faber BW, et al. Health-related quality of life after burns: a prospective multicenter cohort study with 18 months follow-up. *J Trauma Acute Care Surg* 2012;72(2):513-20.
  38. Jones LL, Calvert M, Moiemmen N, et al. Outcomes important to burns patients during scar management and how they compare to the concepts captured in burn-specific patient reported outcome measures. *Burns* 2017;43(8):1682-92. doi: 10.1016/j.burns.2017.09.004
  39. Kool MB, Geenen R, Egberts MR, et al. Patients' perspectives on quality of life after burn. *Burns* 2017;43(4):747-56. doi: <https://doi.org/10.1016/j.burns.2016.11.016>
  40. Brewin CR, Holmes EA. Psychological theories of posttraumatic stress disorder. *Clinical Psychol Review* 2003;23(3):339-76. [published Online First: 2003/05/06]
  41. Ehlers A, Clark DM. A cognitive model of posttraumatic stress disorder. *Behaviour research and therapy* 2000;38(4):319-45. [published Online First: 2000/04/13]
  42. Macleod R, Shepherd L, Thompson AR. Posttraumatic stress symptomatology and appearance distress following burn injury: An interpretative phenomenological analysis. *Health Psychol* 2016;35(11):1197-204. doi: 10.1037/hea0000391 [published Online First: 2016/10/18]
  43. Sartorius N. Stigma and mental health. *The Lancet* 2007;370(9590):810-11. doi: 10.1016/S0140-6736(07)61245-8
  44. Corrigan P. How stigma interferes with mental health care. *American Psychologist* 2004;59(7):614-25. doi: 10.1037/0003-066X.59.7.614
  45. Bond S, Gourlay C, Desjardins A, et al. Anxiety, depression and PTSD-related symptoms in spouses and close relatives of burn survivors: When the supporter needs to be supported. *Burns* 2017;43(3):592-601. doi: 10.1016/j.burns.2016.09.025 [published Online First: 2016/10/21]
  46. Badger K, Royse D. Helping others heal: burn survivors and peer support. *Soc Work Health Care* 2010;49(1):1-18. doi: 10.1080/00981380903157963 [published Online First: 2010/01/16]
  47. Rogers SN, Lowe D. An evaluation of the Head and Neck Cancer Patient Concerns Inventory across the Merseyside and Cheshire Network. *British Journal of Oral and Maxillofacial Surgery* 2014;52(7):615-23.

1  
2  
3  
4  
5  
6  
7  
8  
9  
10  
11  
12  
13  
14  
15  
16  
17  
18  
19  
20  
21  
22  
23  
24  
25  
26  
27  
28  
29  
30  
31  
32  
33  
34  
35  
36  
37  
38  
39  
40  
41  
42  
43  
44  
45  
46  
47  
48  
49  
50  
51  
52  
53  
54  
55  
56  
57  
58  
59  
60

**Figure Legend**

**Figure 1 – An overview of study design**

For peer review only



Figure 1 An overview of study design

190x275mm (96 x 96 DPI)

## **Appendix**

### **Appendix 1 – search strategy for HRQoL tools**

A structured review of the literature was performed in November 2017 to identify current HNA, HRQoL tools and PROMs used in clinical practice and research within the burn population. To meet the objectives of the literature review, articles related to HRQoL assessment and articles outlining the original development of the tool were selected.

#### **Search terms**

# 1 Medical Subject Heading (MeSH) Burns – explode all trees.

# 2 Keyword Burn\*.

# 3 Keyword Thermal Injury\*

# 4 Keyword Holistic Need\*s Assessment\*.

# 5 Keyword Prompt list\*.

# 6 MeSH term Survey and Questionnaires explode all trees.

# 7 MeSH term Health Service Needs – explode all trees.

# 8 Keyword – unmet need\*.

# 9 OR #4 OR #5 OR #6 OR #7 OR #8

# 10 #1 OR #2 OR #3.

#11 #9 AND #10

#### **Inclusion Criteria**

- The tool must be utilised in an adult, burn population. With an adult defined as greater than 18 years of age, as this is when patients enter the adult health services. As the Burns PCI is intended for adults, paediatric tools were deemed irrelevant.
- Tool is patient reported. The aim of the Burns PCI is to prospectively identify patients' concerns, thus healthcare reported tools are irrelevant.



## Exclusion Criteria

- Articles using instruments that were not patient reported (e.g. family member, carer or clinician). As the PCI aims to capture the concerns and issues of patients, tools capturing content from family members, carers or healthcare professionals were deemed irrelevant.
- Articles using generic PROMs that focus on one symptom (e.g. pain). A generic tool being defined as an instrument intended for use in general populations or across a wide range of disease conditions but not specifically to burns patients (Fayers and Machin, 2007). Whilst a number of such tools utilised in adult burn care research (Griffiths et al., 2017), it was believed that such tools mainly focused on assessing the severity of symptoms that were not directly derived from the burn population.
- Articles reporting data/utilising a tool from the paediatric population.
- Articles outlining the cultural validation of HRQoL tools were excluded.
- PROMs and HRQoL tools must have psychometric evidence confirming their reliability, validity and responsiveness; an essential criteria of a HRQoL tool (Aronson et al., 2002).



## **Appendix 2 – Interview Questions**

### **Introduction**

Explain my experience as patient and doctor.

Explain the rationale behind the study providing an example of the H&N PCI to illustrate the intended purpose

Gain informed consent

Start Recording

### **Background information**

Age:

Occupation:

Region:

Living arrangements:

Date of Injury:

### **Injury**

Can you tell more about your injury?

Were you admitted to the hospital?

What aspects of your injury, either now, in the past or in the future concern you?

What aspects of your treatment, either now, in the past or in the future concern you?

What aspects of your injury or treatment or are important to you, either now, in the past or in the future?

Is this something that you might want to talk to your doctor or other healthcare professional about?

### **Close**

Thank the patient for their time. Explain the next stage of the study – the Delphi and provide PIS. Take email address if patient is willing

**Appendix 3 – List of Concerns Extracted from HRQoL tools.**

| HRQoL Tool           | Domains of the Tool                                                                                                                                                                                | Content Extracted                                                                                                                                                                                                                   |
|----------------------|----------------------------------------------------------------------------------------------------------------------------------------------------------------------------------------------------|-------------------------------------------------------------------------------------------------------------------------------------------------------------------------------------------------------------------------------------|
| BSHS-B <sup>25</sup> | Simple abilities, heat sensitivity, hand function, treatment regimen, work, body image, affect, interpersonal relationships and sexuality.                                                         | Heat sensitivity, skin sensitivity, loneliness, low mood, hand function, work, day to day, sex, family, emotions, appearance, wounds, self-care, daily activities, social interactions, dressings, acceptance, scars and anxiety.   |
| YABOQ <sup>26</sup>  | Itch, family function, satisfaction with role, family concerns, pain satisfaction with symptoms, appearance, fine motor, social function, social function limited by appearance, sex and religion. | Itch, pain, mobility, hand function, hobbies/interests, appearance, peoples' perceptions, frustration, sex, anger, family, appetite, the future, sleep, work, study, religion, relationships, food, scars, uncertainty and anxiety. |
| BSPAS <sup>27</sup>  | N/A – Symptom specific.                                                                                                                                                                            | Wound healing, anxiety, dressing changes, pain, treatment, coping and surgery.                                                                                                                                                      |
| POSAS <sup>28</sup>  | N/A Symptom specific.                                                                                                                                                                              | Scar shape, scar size, scar texture, pain and itch.                                                                                                                                                                                 |
| SWAP <sup>29</sup>   | N/A Symptom specific.                                                                                                                                                                              | Family, people's perception, relationships, appearance, intimacy, friends, acceptance.                                                                                                                                              |
| ED5Q <sup>30</sup>   | Mobility, self-care, usual activities, pain/discomfort and anxiety and depression.                                                                                                                 | Mobility, Self-Care, Day to day activities, hand function, pain, anxiety and depression.                                                                                                                                            |
| SF36 <sup>31</sup>   | Physical functioning, role-physical, bodily pain, general health, vitality, social functioning, role-emotional and mental health                                                                   | Interest/hobbies, mobility, hand function, self-care, energy, fatigue, friends, family, relationships, pain, anxiety, exercise and concentration.                                                                                   |

**Appendix 4 Content generated from the MDT.**

| <b>Professional</b>              | <b>Number</b> | <b>Items Added</b>                                                                                                                                                                                                                                                                                                                                                                                                                                     |
|----------------------------------|---------------|--------------------------------------------------------------------------------------------------------------------------------------------------------------------------------------------------------------------------------------------------------------------------------------------------------------------------------------------------------------------------------------------------------------------------------------------------------|
| Consultant Burns Surgeon         | 3             | Camouflagability<br>Guilt<br>Blame<br>Stigma<br>weight                                                                                                                                                                                                                                                                                                                                                                                                 |
| Consultant Anaesthetist          | 2             | Toileting<br>Chronic pain<br>Neuropathic pain                                                                                                                                                                                                                                                                                                                                                                                                          |
| Consultant Clinical Psychologist | 3             | Drug and alcohol use<br>Flashbacks<br>Withdrawal from usual activities<br>/Isolating self<br>Staring<br>Function generally<br>Pain generally<br>Nightmares<br>Intrusive thoughts or images<br>Guilt<br>Embarrassment<br>Avoidance of reminders of<br>accident/injury<br>Comments and questions from others<br>Contractures<br>Frustration<br>Hypervigilance – increased awareness<br>of danger<br>Inability to do certain tasks<br>Loss of functioning |
| Physiotherapist                  | 3             | Function<br>Normality<br>Therapy<br>Touch<br>Confidence<br>Ownership<br>Responsibility<br>Time<br>Enjoyment<br>Fear<br>Future<br>Confusion                                                                                                                                                                                                                                                                                                             |
| Occupational Therapist           | 2             | Compliance                                                                                                                                                                                                                                                                                                                                                                                                                                             |
| Staff Nurse                      | 4             | Reconstruction<br>Exclusion<br>Future – what does it hold?<br>Future – fear<br>Isolation<br>Why me?                                                                                                                                                                                                                                                                                                                                                    |

|  |  |                                                                                                                                                                     |
|--|--|---------------------------------------------------------------------------------------------------------------------------------------------------------------------|
|  |  | Family's response<br>Family support<br>Friend's response<br>Guilt<br>Further surgery<br>What now?<br>Dry skin<br>I'm ugly<br>They're ugly (scars)<br>This is me now |
|--|--|---------------------------------------------------------------------------------------------------------------------------------------------------------------------|

### Appendix 5- List of the total number of items identified

| HRQoL tools           | Patients           | Staff                                          |
|-----------------------|--------------------|------------------------------------------------|
| Acceptance            | Acceptance         | Avoidance of reminders of accident/injury      |
| Anger                 | Alcohol            | blame                                          |
| Anxiety               | Anger              | Camouflagability                               |
| Appearance            | Anxiety            | Chronic pain                                   |
| Appetite              | Appetite           | Comments and questions from others             |
| Concentration         | Avoidance          | Compliance                                     |
| Coping                | Body image         | Confidence                                     |
| Daily activities      | Bullying           | Confusion                                      |
| Day to day activities | Burning pain       | Contractures                                   |
| Depression            | Camouflage         | Dry skin                                       |
| Dressings             | Chronic pain       | emotion                                        |
| Emotions              | Coping             | Enjoyment                                      |
| Energy                | Creams             | Exclusion                                      |
| Exercise              | Daily living       | Exercise                                       |
| Family                | Depression         | Family's response                              |
| Family                | Dressing changes   | flashbacks                                     |
| Fatigue               | Driving            | Friend's response                              |
| Food                  | Family             | Frustration                                    |
| Friends               | Family Support     | Function                                       |
| Frustration           | Fatigue            | Further surgery                                |
| Hand function         | Fear               | Future – fear                                  |
| Heat sensitivity      | Finance            | Future – what does it hold?                    |
| Hobbies/interests     | Flashbacks         | GP                                             |
| Interest/hobbies      | Guilt              | Guilt                                          |
| Intimacy              | Hair               | Hyperalgesia/increased sensitivity to pain     |
| Itch                  | Hand function      | Hypervigilance – increased awareness of danger |
| Loneliness            | Heat sensitivity   | I'm ugly                                       |
| Low mood              | Hobbies            | Inability to do certain tasks                  |
| Mobility              | Infection          | information                                    |
| Pain                  | Information        | Isolation                                      |
| Peoples' perceptions  | Intimacy           | Loss of functioning                            |
| Relationships         | Itch               | Neuropathic pain                               |
| Religion              | Legal Implications | Normal                                         |

|    |                       |                      |                      |
|----|-----------------------|----------------------|----------------------|
| 1  |                       |                      |                      |
| 2  |                       |                      |                      |
| 3  | Scar Shape            | Low mood             | Normality            |
| 4  | Scar size             | Medication           | Online information   |
| 5  | Scar texture          | Mobility             | Ownership            |
| 6  | Scars                 | Nerve pain           | personality          |
| 7  | Self care             | Pain                 | Reconstruction       |
| 8  | Sex                   | People's perception  | Responsibility       |
| 9  | Sex                   | People's perception  | Responsibility       |
| 10 | Sex                   | People's perception  | Responsibility       |
| 11 | Skin sensitivity      | Personal care        | splints              |
| 12 | Sleep                 | Pregnancy            | Stigma               |
| 13 | Social interactions   | Pressure Garment     | stress               |
| 14 | Study                 | Psychological Trauma | Support groups       |
| 15 | Support for my family | Relationships        | Therapy              |
| 16 | Support for my family | Relationships        | Therapy              |
| 17 | Surgery               | Scarring             | They're ugly (scars) |
| 18 | The future            | Self-Esteem          | This is me now       |
| 19 | Uncertainty           | Skin sensitivity     | Time                 |
| 20 | Uncertainty           | Skin sensitivity     | Time                 |
| 21 | Work                  | Skin strength        | To be touched        |
| 22 | Wound healing         | Sleep                | Toileting            |
| 23 | Wounds                | Smoking              | Touch                |
| 24 | Wounds                | Splint               | weight               |
| 25 |                       | Tightness            | What now?            |
| 26 |                       | Travel               | Why me?              |
| 27 |                       | Treatment            |                      |
| 28 |                       | Weight               |                      |
| 29 |                       | Work and education   |                      |
| 30 |                       | Wound care           |                      |
| 31 |                       |                      |                      |
| 32 |                       |                      |                      |
| 33 |                       |                      |                      |
| 34 |                       |                      |                      |
| 35 |                       |                      |                      |
| 36 |                       |                      |                      |
| 37 |                       |                      |                      |
| 38 |                       |                      |                      |
| 39 |                       |                      |                      |
| 40 |                       |                      |                      |
| 41 |                       |                      |                      |
| 42 |                       |                      |                      |
| 43 |                       |                      |                      |
| 44 |                       |                      |                      |
| 45 |                       |                      |                      |
| 46 |                       |                      |                      |
| 47 |                       |                      |                      |
| 48 |                       |                      |                      |
| 49 |                       |                      |                      |
| 50 |                       |                      |                      |
| 51 |                       |                      |                      |
| 52 |                       |                      |                      |
| 53 |                       |                      |                      |
| 54 |                       |                      |                      |
| 55 |                       |                      |                      |
| 56 |                       |                      |                      |
| 57 |                       |                      |                      |
| 58 |                       |                      |                      |
| 59 |                       |                      |                      |
| 60 |                       |                      |                      |

Appendix 6 – The completed PCI

Insert tailored branding for PCI users/Burns services here.

Adult Burns

## Patient Concerns Inventory [PCI]

Please choose from the list of issues you would specifically like to talk about in your consultation in clinic today. You can choose more than one option (tick boxes).

**Physical and functional well-being:**

- Contractures
- Daily Activities
- Dry Skin
- Energy
- Exercise
- Hand Function
- Heat Sensitivity
- Increased skin sensitivity
- Itch
- Loss of functioning
- Mobility
- Nerve Pain
- Pain
- Scarring
- Sleep
- Stiffness
- Tightness
- Weight

**Social Care and Social well-being:**

- Family/Support for my family
- Finance
- Friends
- Hobbies/Interests
- Legal implications of the accident/injury
- Personal Care
- Work/Education

**Psychological, emotional and spiritual well-being:**

- Acceptance
- Alcohol
- Anger
- Anxiety
- Appearance
- Body image
- Avoidance
- Comments and questions from others
- Concentration
- Confidence
- Coping
- Depression
- Emotions
- Flashbacks
- Increased awareness of danger
- Low mood
- Psychological Trauma
- Relationships
- Self esteem
- Sex
- Smoking
- The future

**Treatment related concerns:**

- Camouflage
- Dressing changes
- Infection
- GP
- Medication
- Ongoing wound/scar care
- Pressure Garments
- Reconstruction
- Splints
- Support groups
- Therapy

**Other (Please State):**

\_\_\_\_\_

\_\_\_\_\_

\_\_\_\_\_

\_\_\_\_\_

\_\_\_\_\_

Name:

Affix label here

1  
2  
3  
4  
5  
6  
7  
8  
9  
10  
11  
12  
13  
14  
15  
16  
17  
18  
19  
20  
21  
22  
23  
24  
25  
26  
27  
28  
29  
30  
31  
32  
33  
34  
35  
36  
37  
38  
39  
40  
41  
42  
43  
44  
45  
46  
47  
48  
49  
50  
51  
52  
53  
54  
55  
56  
57  
58  
59  
60

**Insert tailored branding for PCI users/Burns services here.**

The following page gives you the opportunity to highlight people you may wish to talk to. Are there any people you would specifically like to talk with either in clinic or by referral?

- Burns Surgeon
- Nursing Staff
- Specialist Nurse
- Psychologist
- Dietician
- Occupational Therapist
- Physiotherapist
- Other: .....

Thank you for your time. All information is confidential. We found PCI has helped patients express issues in their clinic. Please hand this is to clinic staff.

©The Burns PCI was developed in collaboration with Edge Hill University, The Mersey regional Burns Centre, The Welsh Centre for Burns, The Katie Piper Foundation and Aintree University Hospital

Name:

Affix label here

# BMJ Open

## Identifying patient concerns during consultations in tertiary burns services: Development of the adult, Burns Patient Concerns Inventory

|                                 |                                                                                                                                                                                                                                                                                                                                                                                                                                                                                                                                                                                                                                                                                                                                                                                                                                                                                                                        |
|---------------------------------|------------------------------------------------------------------------------------------------------------------------------------------------------------------------------------------------------------------------------------------------------------------------------------------------------------------------------------------------------------------------------------------------------------------------------------------------------------------------------------------------------------------------------------------------------------------------------------------------------------------------------------------------------------------------------------------------------------------------------------------------------------------------------------------------------------------------------------------------------------------------------------------------------------------------|
| Journal:                        | <i>BMJ Open</i>                                                                                                                                                                                                                                                                                                                                                                                                                                                                                                                                                                                                                                                                                                                                                                                                                                                                                                        |
| Manuscript ID                   | bmjopen-2019-032785.R3                                                                                                                                                                                                                                                                                                                                                                                                                                                                                                                                                                                                                                                                                                                                                                                                                                                                                                 |
| Article Type:                   | Original research                                                                                                                                                                                                                                                                                                                                                                                                                                                                                                                                                                                                                                                                                                                                                                                                                                                                                                      |
| Date Submitted by the Author:   | 27-Oct-2019                                                                                                                                                                                                                                                                                                                                                                                                                                                                                                                                                                                                                                                                                                                                                                                                                                                                                                            |
| Complete List of Authors:       | Gibson, John; Edge Hill University, Postgraduate Medical Institute; Abertawe Bro Morgannwg University Health Board, The Welsh Centre for Burns & Plastic Surgery<br>Yarrow, Jeremy; Abertawe Bro Morgannwg University Health Board, The Welsh Centre for Burns & Plastic Surgery<br>Brown, Liz; Abertawe Bro Morgannwg University Health Board, The Welsh Centre for Burns & Plastic Surgery<br>Evans, Janine; Abertawe Bro Morgannwg University Health Board, The Welsh Centre for Burns & Plastic Surgery<br>Rogers, Simon; Aintree University Hospitals NHS Foundation Trust; Edge Hill College, Postgraduate Medical Institute<br>Spencer, Sally; Edge Hill University, Postgraduate Medical Institute (PGMI), Faculty of Health & Social Care<br>Shokrollahi, Kayvan; Edge Hill University, Postgraduate Medical Institute; Saint Helen's and Knowsley Teaching Hospitals NHS Trust, Mersey Regional Burns Centre |
| <b>Primary Subject Heading</b>: | Patient-centred medicine                                                                                                                                                                                                                                                                                                                                                                                                                                                                                                                                                                                                                                                                                                                                                                                                                                                                                               |
| Secondary Subject Heading:      | Surgery, Communication                                                                                                                                                                                                                                                                                                                                                                                                                                                                                                                                                                                                                                                                                                                                                                                                                                                                                                 |
| Keywords:                       | Burns, Patient Concerns Inventory, Health Related Quality of Life, Patient Centred Care                                                                                                                                                                                                                                                                                                                                                                                                                                                                                                                                                                                                                                                                                                                                                                                                                                |
|                                 |                                                                                                                                                                                                                                                                                                                                                                                                                                                                                                                                                                                                                                                                                                                                                                                                                                                                                                                        |

SCHOLARONE™  
Manuscripts



1  
2  
3 **Identifying patient concerns during consultations in tertiary burns services:**  
4 **Development of the adult, Burns Patient Concerns Inventory**  
5

6 John A. G. Gibson<sup>1,2\*</sup>, Jeremy Yarrow<sup>2</sup>, Liz Brown<sup>2</sup>, Janine Evans<sup>2</sup>, Simon N. Rogers<sup>1,3</sup>,  
7 Sally Spencer<sup>1</sup>, Kayvan Shokrollahi<sup>1,4</sup>  
8  
9

- 10  
11  
12 1. Postgraduate Medical Institute, Edge Hill University, Ormskirk, UK  
13 2. The Welsh Centre for Burns & Plastic Surgery, Morriston Hospital, Swansea, UK  
14 3. Merseyside Regional Maxillofacial Unit, University Hospital Aintree, Liverpool, UK  
15 4. Mersey Regional Burns Centre, Whiston Hospital, Merseyside, UK  
16  
17  
18

19  
20 \*Corresponding Author  
21

22 Email:johnaggibson@hotmail.com  
23

24  
25 Data Availability Statement: Due to the sensitive nature of the study and to prevent the risk  
26 of patient identification, data from the study will not be made available.  
27  
28  
29  
30  
31  
32  
33  
34  
35  
36  
37  
38  
39  
40  
41  
42  
43  
44  
45  
46  
47  
48  
49  
50  
51  
52  
53  
54  
55  
56  
57  
58  
59  
60

## Abstract

### Objectives

Identifying the issues and concerns that matter most to burns survivors can be challenging. For a number of reasons, but mainly relating to patient empowerment, some of the most pressing concerns patients may have during a clinical encounter may not naturally be the focal point of that encounter. The Patient Concerns Inventory (PCI) is a tried and tested concept initially developed in the field of head and neck cancer that empowers patients during a clinical encounter through provision of a list of prompts that allows patients to self-report concerns prior to consultation. The aim of this study was to develop a Patients Concerns Inventory (PCI) for adult burns patients.

### Design

Content for the PCI was generated from three sources: Burns Health Related Quality of Life (HRQoL) tools, thematic analysis of one-to-one interviews with twelve adult burns patients and seventeen Multi-Disciplinary Team (MDT) members. Content was refined using a Delphi consensus technique, with patients and staff members, using SurveyMonkey.

### Setting

Within outpatient secondary care.

### Participants

Twelve adult burn patients and MDT members from two regional burns centres.

### Results

A total of 111 individual items were generated from the three sources. The Delphi process refined the total number of items to 58. The main emergent domains were physical and functional well-being (18 items), psychological, emotional and spiritual well-being (22 items), social care and social well-being (7 items) and treatment-related concerns (11 items).

### Conclusions

The Adult, Burns-Specific Patient Concerns Inventory (PCI-B (adult)) is a 58-item, holistic prompt list, designed to be used in the outpatient clinic. It offers a new tool in burn care to improve communication between healthcare professionals and patients, empowering them to

1  
2  
3 identify their most pressing concerns and hence deliver a more focussed and targeted patient-  
4 centred clinical encounter.  
5  
6

7 **Keywords:** Burns; Health-Related Quality of Life, Holistic prompt list, Patient Concerns  
8  
9 Inventory; PCI; patient-centred care.  
10

### 11 **Strengths and Limitations of this study**

12  
13  
14

- 15 • The PCI offers a new tool in burn care to improve communication between healthcare  
16 professionals and patients
- 17 • The PCI – B (Adult) has been developed in accordance with international standards  
18 on Health Related Quality of Life tool development.
- 19 • Content within the PCI may not capture concerns unique to patients from other  
20 cultures, age groups, or those with other types of burns.
- 21 • Further work is required to determine the efficacy of the tool in the clinical setting.  
22  
23  
24  
25  
26  
27  
28  
29  
30  
31  
32  
33  
34  
35  
36  
37  
38  
39  
40  
41  
42  
43  
44  
45  
46  
47  
48  
49  
50  
51  
52  
53  
54  
55  
56  
57  
58  
59  
60

## Introduction

Globally, burns are the fourth most common form of trauma after road traffic accidents, falls and interpersonal violence<sup>1</sup>. In 2008, the World Health Organisation (WHO) estimated that 195,000 people died from fire-related injuries, a decrease of almost 40% in relation to 2004<sup>1</sup>. The decline in mortality has been attributed to improved knowledge of the pathophysiological response to injury and progress in intensive care, nutrition, surgical techniques and infection control<sup>3</sup>. Consequently, more patients are surviving major burn injuries and require long-term support and rehabilitation.

The need for a holistic approach to burn care is essential if the many issues that a patient may encounter such as physical symptoms, psychological issues and reduced physical function are to be fully addressed<sup>4,5</sup>. In the time-restricted outpatient setting, identifying the issues and concerns that matter most to patients can be challenging. Furthermore, it is often difficult to identify patients that 'suffer in silence' and some concerns, for example the impact of burn injuries on sexual relationships, may be potentially embarrassing or difficult for both the patient and health care professional to discuss unless there is some mechanism or prompt to facilitate this<sup>6,7</sup>. The stress and anxiety associated with attending clinic appointments, often involving extensive journeys, may also cause patients to forget to raise important issues during the consultation.

An open, communicative relationship helps patients understand their health condition, improving satisfaction, improving health outcomes and reducing patient stress<sup>8,9</sup>. Improvements in patient-professional communication have been most notable in oncology where the concept of Holistic Needs Assessment (HNA) has become an integral aspect of care<sup>10</sup>. Rogers et al. developed and piloted a Patient Concerns Inventory (PCI) to assess the needs of patient with head and neck cancer<sup>11</sup>. The PCI, is a prompt list containing potential concerns, that patients may wish to discuss with their healthcare professional. It is completed prior to consultation, and enables the clinician to focus the discussion around the individual's needs. The PCI has since been validated in rheumatology<sup>12</sup>, neuro-oncology<sup>13</sup> and breast cancer<sup>14</sup> and is associated with greater patient satisfaction, and service efficiency<sup>11,13,15-17</sup>.

The aim of this study was to develop a PCI for adult burns patients.

## Methods

The study comprised three distinct stages. Firstly, content for the PCI was generated from three sources: burns-specific health related quality of life (HRQoL) tools, one to one interviews with burns patients and focus groups with multi-disciplinary care teams (MDT) from two regional burns centres. Following this stage, items were refined using a Delphi process. The final stage of PCI development was to group items into discrete domains.

The need for both patient and professional involvement in the development of patient-focused tools is extensively documented within the literature. It is argued that such an approach is essential to ensure the tool adequately reflects the needs of the target population<sup>18-20</sup> and this approach was therefore adopted from the outset.

### 1. CONTENT GENERATION

#### a. HRQoL Tools

A systematic search of MEDLINE, the Cochrane library, Embase and PsycInfo was undertaken in June 2017 to identify HRQoL tools psychometrically validated for an adult burn population ( $\geq 18$ ). Grey literature was searched using Google Scholar and OpenGrey. The detailed search strategy is outlined in appendix 1.

Relevant items were extracted from the HRQoL measures by JAGG and independently verified by SS.

#### b. One-to-One Patient Interviews

Participants were recruited from two regional burn centres in the UK; The Welsh Centre for Burns & Plastic Surgery, Swansea and The Mersey Burns Centre, Liverpool, using the following eligibility criteria: Participants aged 18 or above, with a burn injury and actively receiving treatment. Participants unable to speak English or unable to provide informed consent were excluded.

A purposive sampling strategy was used to select participants representative of the wider burns population based on: age (18-30, 31-50, 50-65, >65), gender, mechanism of burn (scald, flame, contact, electrical and chemical), severity of burn (0-15% TBSA, >15%TBSA) and time following injury (<6 months since injury, 6 months -1 year, >1 year).

1  
2  
3 Eligible participants were identified by clinic staff and provided with participant information  
4 sheets describing the study. Those willing to participate contacted JAGG who arranged a  
5 suitable time and date for the interview. Written informed consent was provided by all  
6 participants prior to interviews, which were conducted in a confidential space in the burns  
7 centre using a semi-structured interview format. Participants were asked to describe concerns  
8 and issues encountered during the course of their recovery; the initial acute inpatient  
9 treatment (where applicable), outpatient treatment and their concerns for the future  
10 (Appendix 2).  
11  
12  
13  
14  
15  
16

17  
18 All interviews were conducted by JAGG. JAGG is a specialist registrar in Burns & Plastic  
19 Surgery and is a former burns survivor. Interviews were digitally audio-recorded and  
20 transcribed verbatim (JAGG). Data were analysed using a six step inductive thematic  
21 approach<sup>21</sup> supported by NVivo v12 software. Data collection and analysis were concurrent  
22 to enable determination of data saturation; where additional interviews did not yield new  
23 information<sup>22</sup>. Concerns described by participants were assigned unique codes and those  
24 deemed irrelevant to the PCI were excluded. Where possible, the wording of the codes was  
25 used in the language patients described their concerns. The codes that remained were the  
26 initial list of patient concerns. Coding was performed by JAGG and verified by SS who have  
27 extensive knowledge in qualitative analysis.  
28  
29  
30  
31  
32  
33  
34

### 35 36 c. Multi-Disciplinary Team (MDT)

37  
38 Staff were recruited from two regional burn centres in the UK; The Welsh Centre for Burns  
39 & Plastic Surgery, Swansea and The Mersey Burns Centre, Liverpool. The Welsh Centre for  
40 Burns & Plastic Surgery is the regional adult burns centre for the South West of the United  
41 Kingdom, covering a population of 10 million. The Mersey Burns Centre, is a regional burns  
42 centre for the North-West of the United Kingdom, covering a population of 4.5 million. Both  
43 services contain a dedicated burns MDT providing all aspects of burn care.  
44  
45  
46  
47  
48

49 Staff were eligible if they were a dedicated member of the burns MDT and had been working  
50 in burn care for a minimum of one year. Informed consent was obtained from all staff  
51 participants. Items harvested in stage a) were reviewed by members of the MDT who then  
52 added additional items. Concerns devised from patients in stage b) were not shared with the  
53 MDT to enable comparison between groups.  
54  
55  
56  
57  
58  
59  
60

## 2. CONTENT REFINEMENT

Incorporating every concern identified would have been extensive, placing a high burden on patients and staff in terms of completion time and analysis, therefore not feasible in the confines of an outpatient clinic<sup>20 22</sup>. Content reduction was therefore necessary at this stage to remove similar items and to achieve consensus on the final item list. Development of other versions of the PCI have confirmed that a checklist of 50-100 items is feasible in the outpatient setting<sup>11-13</sup>. An item bank was compiled from the three aforementioned sources; HRQoL tools, patient interviews and the MDT. An online Delphi process using SurveyMonkey software<sup>23</sup> was used to reduce and refine the item bank. To maintain stakeholder validity, both healthcare professionals and patients who participated in content generation were invited to take part. Participants were asked to select items for inclusion in the final PCI and to add additional items considered missing. Items with less than a 60% selection rate were excluded from the final PCI. The survey was repeated and items with a 60% agreement were retained in the final list of concerns. This level of consensus has been shown to be effective in previous versions of the PCI<sup>11-13</sup>.

A secondary outcome of the Delphi study was to gain feedback on the wording of individual items on the PCI. Significant overlap was generated from the three sources of content development. All items generated, included those that had similar definitions (e.g energy and fatigue) were included in the Delphi. Participants were asked to review the wording of the items to ensure that the list was deemed comprehensive by the intended audience and to select the term they considered most appropriate.

## 3. ITEM DOMAINS

The purpose of this stage was to group similar aspects of health together to help patients focus on one topic at a time when completing the PCI. The final list of concerns were allocated to one of the four following domains:

1. Physical and functional well-being.
2. Psychological, spiritual and emotional well-being.
3. Social care and social well-being.
4. Treatment related concerns.

These four domains feature on other versions of the PCI and are consistent with the domains of other general and disease specific HRQoL measures<sup>24</sup>. They were therefore deemed

1  
2  
3 appropriate for the adult burns PCI. A further Delphi process, using SurveyMonkey, was  
4 used to allocate items to domains based on 60% consensus from MDT staff.  
5  
6

#### 7 PATIENT AND PUBLIC INVOLVEMENT 8

9  
10 A patient and public involvement session was hosted by the Katie Piper Foundation. This  
11 informal focus group highlighted the disparity between issues considered important by health  
12 professionals managing care and patients receiving care. Patient feedback was used to design  
13 the study and aid with patient recruitment.  
14  
15  
16

#### 17 ETHICAL APPROVAL 18

19  
20 The study was approved by the Health Research Authority North West - Greater Manchester  
21 Central Research Ethics Committee 17/NW/0297 IRAS ID 214597 in May 2017 prior to the  
22 commencement of the study.  
23  
24  
25  
26  
27  
28  
29  
30  
31  
32  
33  
34  
35  
36  
37  
38  
39  
40  
41  
42  
43  
44  
45  
46  
47  
48  
49  
50  
51  
52  
53  
54  
55  
56  
57  
58  
59  
60



## RESULTS

A diagram displaying an overview of the three stages of tool development alongside the number of concerns generated is shown in Figure 1 – An overview of study design.

### CONTENT GENERATION

#### a. HRQoL tools

The search identified seven HRQoL tools. Five were disease specific; the Burn Specific Health Scale-Brief (BSHS-B)<sup>25</sup>, The Young Adult Burn Outcome Questionnaire (YABOQ)<sup>26</sup>, Burn Specific Pain Anxiety Scale (BSPSAS)<sup>27</sup>, The Patient Observer Scar Assessment Scale (POSAS)<sup>28</sup>, The Satisfaction With Appearance Scale (SWAP)<sup>29</sup>. Two were generic; EQ 5D<sup>30</sup> and SF 36<sup>31</sup>. Forty-nine items were harvested from the seven measures (Appendix 3).

#### b. One to One Interviews

Twelve face-to-face interviews lasting for average of 46 minutes (20-85 mins) were conducted between August and September 2018. Saturation was determined as interviews number 11 and 12 did not lead to the emergence of any new codes. This was independently assessed by SS.

Population demographics are shown in Table 1.

**Table 1 Patient demographics**

|                                       |                     |
|---------------------------------------|---------------------|
| Patients, N                           | 12                  |
| Age (yrs), mean (S.D), range          | 47.9 (12.3), 28-60  |
| Male, N                               | 7                   |
| Female, N                             | 5                   |
| White British                         | 12                  |
| Years since injury, mean (S.D), range | 13.3 (23.1), 0.1-53 |
| Percentage TBSA, mean (S.D), range    | 24 (29.4), 1 -80    |
| Aetiology                             |                     |
| Contact burn, N                       | 2                   |
| Chemical burn, N                      | 1                   |
| Electrical burn, N                    | 1                   |
| Flame burn, N                         | 5                   |
| Flash burn, N                         | 2                   |
| Scald burn, N                         | 1                   |
| Contractures, N                       | 4                   |
| Presence of scarring, N               | 9                   |
| Type of scarring                      |                     |
| Pigmented, N                          | 5                   |
| Hypertrophic, N                       | 6                   |
| Location of scarring                  |                     |
| Head & Neck, N                        | 5                   |
| Upper Limb, N                         | 7                   |
| Lower Limb, N                         | 4                   |
| Torso, N                              | 6                   |
| Surgical intervention, N              | 7                   |

S.D –Standard Deviation

1  
2  
3 TBSA: Total Body Surface Area

4 A total of 97 individual codes were generated from the 12 interviews. Following removal of  
5 forty duplicate and similar items, 57 concerns remained. . Where possible, the wording of the  
6 concerns and issues outlined below, reflected the language used by the patients interviewed.  
7  
8  
9

## 10 **Items Generated**

### 11 **Physical concerns relating to wounds and Scars**

12  
13 All twelve participants expressed concerns about potential scarring, though only nine had  
14 developed scars. When specifically probed about the physical appearance of scars, patients  
15 did not focus on specific features, such as the colour or texture; they were more concerned  
16 with overall appearance and the impact of scarring on other aspects of physical health and  
17 well-being, such as mobility. The following concerns were identified in relation to wounds  
18 and scars.  
19  
20  
21  
22  
23  
24  
25

26  
27 Pain was an overriding concern for all participants, at multiple time points of their recovery.  
28  
29 *“I don’t remember what normal felt like...it sounds really stupid to say but a year has gone  
30 and I don’t know what it’s like to not be in pain.”* (Participant 8)  
31  
32  
33

34 Nerve (neuropathic) pain was described separately by three patients and therefore considered  
35 a separate concern. The wording of “Nerve pain” was selected as this was the common  
36 language that patients described their symptoms.  
37  
38  
39  
40

41 Mobility was a concern raised by eight participants, such as an inability to perform routine  
42 day to day activities, arising from movement restriction, pain or skin sensitivity.  
43  
44 *“The initial part from laying down to sitting up to getting off the bed was really hard across  
45 the back [Patient had burn wounds to the back]. It was so painful, it was really hard.”*  
46  
47

48 (Participant 11)

49 Hand function was a concern expressed by all six participants that had injuries to the hand  
50 and upper limb. For one builder this issue severely limited his ability to work:  
51  
52  
53

54 *“I still can’t grip with this one, [Lifts dominant left hand] that’s my grip [attempts to grip the  
55 investigators pen with limited success]. But it’s like stupid things, like I can’t hold a nail. I  
56 hold a nail and me arm shakes. I can’t hold a screw.”* (Participant 8)  
57  
58  
59  
60

1  
2  
3 Skin strength was a concern for five participants. For one participant, a self-employed  
4 mechanic, it had a substantial impact on his work:

5  
6 *“I’ve noticed a few times now that when I cut my hands on something, when you’re working,*  
7 *it opens the skin up quite easily. Whereas before it may have caused a scratch, now it’s a big*  
8 *problem.”*  
9 (Participant 2)

10  
11  
12  
13 Scar tightness was a concern for all nine participants that had scarring. For six patients this  
14 was related to mobility limitation and captured above, but for three participants, scar  
15 tightness was associated with discomfort rather mobility issues.

16  
17  
18 *“The groin is quite tight. It’s like I’ve got a pair of knickers on that are four sizes too small.”*  
19 (Participant 7)

20  
21  
22 Scar tightness was also a concern for patients with abdominal scarring during pregnancy.

23 Weight gain was a concern for four patients, arising from reduced mobility and excessive  
24 calorie intake. The excess weight increased participant’s dissatisfaction with their appearance  
25 and increased scar tightness resulting in additional discomfort.

26  
27  
28 Skin sensitivity was a concern for most of the interviewees, including itching during wound  
29 healing (four participants), scar sensitivity (six participants) and heat sensitivity (five  
30 participants).

31  
32  
33 *“When I got the slightest touch, I would just have to move.”*  
34 (Participant 6)

### 35 36 37 38 **Physical concerns not related to scars**

39 Concerns about other aspects of physical function included, sleep deprivation (seven  
40 participants), loss of appetite (four participants) and fatigue during the initial recovery stage  
41 (six participants), and lack of energy (four participants).

42  
43  
44 *“It’s a different tired to when you’re not getting sleep.”*

45  
46  
47 (Participant 2)

### 48 49 **Body image**

50 Physical appearance and body image was an important concern for all participants.

51  
52  
53 *“I still want nice normal skin. I want to look in a mirror and not see this burned flesh that*  
54 *stays with me all the time.”*  
55 (Participant 7)

1  
2  
3 As a direct consequence of scarring, nine participants described anxiety associated with  
4 acceptance by society. Five participants described a lack of confidence and low self esteem  
5 following the injury.  
6  
7

8 *“I just felt like nothing. I’m now very happy with my life but it [the injury] made me feel ugly*  
9 *and worthless.”* (Participant 7)  
10  
11

12  
13 Comments from others were of great concern throughout the recovery process for all twelve  
14 participants. Three patients reported bullying and another described discrimination in the  
15 workplace owing to scarring.  
16  
17

18 *“If I were to walk into a pub with you I would be the topic of conversation because I’m*  
19 *different. I see that and I feel that.”* (Participant 5)  
20  
21  
22

### 23 24 **Coping Strategies**

25  
26 Coping with the psychological sequelae of the injury was a concern for seven of the  
27 participants. Coping mechanisms such as increased alcohol consumption and smoking were  
28 concerns for two participants and avoidance of reminders were described by seven  
29 participants. For some, this impacted upon daily functioning.  
30  
31  
32

33  
34 *“The stove is still a no go for me. I’m back in the kitchen doing butties and things like that*  
35 *but putting things on the stove I’m still a bit shaky.”* (Participant 6)  
36  
37

38 Fear for the future and anger were other negative coping strategies described by participants  
39

40 *“I get angry now when I talk about it because I used to get a bit sad and a bit feeling down*  
41 *but I can’t now, I just get.... It’s like a rage that comes over me. No, I can’t work it out.”*  
42  
43

44 (Participant 4)  
45

### 46 **Mental health**

47  
48 Anxiety was encountered by five participants, causing considerable repercussions.  
49

50  
51 *“I’m suffering a lot from panic attacks, anxiety, really, really badly. There’s mornings now*  
52 *where I have to really argue with myself to actually wake up and go to work.”*  
53  
54

55 (Participant 8)  
56

57 Depression was experienced by five participants and low mood by eight.  
58

59 *“It would change my mood. It would bring me down and I’m not a person that’s down”*  
60

(Participant 2)

Participants described low mood to avoid the perceived stigma associated with mental health conditions. One participant described the impact of appropriate terminology:

*“If you say that people need help with their well-being and their full recovery, which means physical and mental in every sense, emotional and so on, that is better than implying that people must have mental health problems because they’ve been through a trauma. That would draw in a wider set of people who [wanted or needed] some kind of mental health support.”*

(Participant 9)

Dependence on others and guilt were described by seven and six patients respectively. Guilt was experienced mostly by patients who, witnessed other survivors with more severe injuries.

*“I felt ashamed and embarrassed and horrible and dirty and guilty because I’m alive really.”*

(Participant 7)

### **PTSD symptomology**

Seven participants suffered flashbacks of the injury event.

*“I would have the odd flashback. I try not to think about it ... as they were really bad.”*

(Participant 2)

Six participants described broad concerns and issues relating to their psychological and emotional well-being that could not be defined by any of the above themes. The term psychological trauma was used as the code. One patient who was assaulted, developed depression and PTSD:

*“I’ve had to stop thinking about it, because the more I was trying to think about why they did it, I was getting nowhere, ... but when I look at my arm sometimes, [the scar] it just triggers it again.”*

(Participant 8)

### **Social Well-Being**

All twelve participants were concerned about the impact of the injury on their intimate, personal and social relationships. Four participants raised specific concerns about intimacy.

*“Intimacy is awkward, you know... we still have a loving relationship but it’s not what it was before the accident. It was quite hard to come to terms with.”*

(Participant 4)

All participants were concerned about the impact of their injury on family members. Concerns related to the psychological trauma experienced by members of the family who witnessed the trauma:

*“My son was screaming, I mean he must have seen me on fire.”* (Participant 1)

Both physical and psychological aspects of the injury prevented six participants from continuing their regular hobbies and interests. Returning to work and education following the injury were concerns raised by ten participants. The financial implications of the injury were far reaching and perceived as an issue for six patients. For one participant, it was perceived as the most difficult aspect of the injury.

*“Financial that’s been.... If I’m honest with you, I’ve found that worse than the pain.”*

(Participant 8)

### **Treatment Related Concerns**

All twelve participants expressed concerns about good communication with the clinical team in relation to their treatment. Communication was perceived as poor when patients did not feel that their needs were identified or addressed, leading to significant distress.

*“Some went “don’t you worry we’re doing what we can” kind of thing. So what are you doing? What is the plan? I kind of got the impression that had we not pushed, they wouldn’t have explained.”* (Participant 9)

On the other hand, excellent communication inspired greater confidence in the competence of healthcare professionals. In instances where treatment options were not available for particular issues, patients appreciated honesty.

*As an adult now, he’s helped me understand. It’s like he can do little bits to tidy me up. I think that I don’t want to accept it. He can’t get rid of it all but he can make me better. So I feel valued as a person not like the other consultants. It can do a lot of damage. It really can.*

(Participant 7)

In the early stages of recovery, patients had numerous concerns relating to wound care and infection.

1  
2  
3 “Well with the wound healing, what it was was the infection. Because of the smell I was  
4 constantly worrying that the work they [healthcare professionals] had done was wasted and  
5 that I would be back [in hospital] getting something else done.” (Participant 6)  
6  
7  
8  
9

10  
11 Once wounds had healed, the majority of concerns related to scar treatment options, notably  
12 pressure garments, splints, reconstruction and camouflage.  
13

14  
15 Four participants raised numerous concerns about the primary care (General Practitioner)  
16 team’s knowledge of burns injuries.  
17

18  
19 “I felt quite vulnerable because they didn’t have the [specialist] knowledge. I don’t think  
20 there is a lot of knowledge [about] burns, I really don’t.”  
21

22  
23 (Participant 12)  
24

25 An aspect of care that four participants felt was missing was support for family members,  
26 especially parents of young children. For one participant, who was assaulted, this was a  
27 significant concern.  
28

29  
30  
31 “There’s been no support offered for my kids. Even if it’s just to talk to somebody...”  
32

33 (Participant 8)  
34  
35  
36

### 37 c. Multi-Disciplinary Team

38  
39 Data collection was performed between September and October 2018. Seventeen members of  
40 the clinical teams from the two centres contributed to item generation, which identified 54  
41 potential concerns. Composition of the MDT is shown in table 2, with the list of concerns  
42 displayed in Appendix 4. The wording of items were devised by each staff member.  
43  
44  
45

46  
47 **Table 2 MDT members**

| Professional                     | Number |
|----------------------------------|--------|
| Consultant Burns Surgeon         | 3      |
| Consultant Anaesthetist          | 2      |
| Consultant Clinical Psychologist | 3      |
| Physiotherapist                  | 3      |
| Occupational Therapist           | 2      |
| Staff Nurse                      | 4      |



### **Content Generation: variation between sources**

Whilst specific wording of concerns varied between the literature, patients and MDT sources, there was significant overlap and consistency in the content of the four domains (Appendix 5). There were also differences between the sources, with each contributing unique concerns, reinforcing the validity and importance of capturing multiple professional and patient perspectives during content generation.

For the physical and functional well-being domain, the concerns identified were largely consistent across all three sources. However, there were a few exceptions. Skin strength and dental health were concerns unique to patients. Dry skin, contractures and specific scar characteristics (shape, size and texture) were identified in the HRQoL tools and by members of the MDT but not during the patient interviews.

For the psychological, emotional and spiritual well-being domain, acceptance by society was a concern only raised by patients. Hypervigilance/increased awareness of danger, was not identified in the HRQoL tools. Change of personality was a concern identified by a member of the MDT, but this concern was not raised by patients.

For the social care and social well-being domain, concerns about driving were only raised by patients whereas religion, and responses by friends and family were identified by the MDT and HRQoL tools.

For the treatment related concerns domain, medication and the management of infection were concerns raised only by patients.

## **CONTENT REFINEMENT**

After removal of duplicate items, a total of 111 individual concerns, generated from the literature, patient interviews and the MDT were incorporated in the Delphi survey. Nine of the twelve (75%) patients that participated in the one to one interviews participated in the survey. Seventeen members of the MDT's at the two sites participated in the Delphi survey.

Fifty-eight items achieved a 60% consensus agreement following the two rounds of the Delphi survey and were retained for the inventory.

## **GROUPING ITEMS IN DOMAINS**

Five staff members independently allocated the final 58 concerns into one of the following four domains, which were previously identified from other versions of the PCI: physical and functional well-being (18 concerns); psychological, spiritual and emotional well-being (22 concerns); social care and social well-being (7 concerns); treatment related concerns (11 concerns). Categorisation of the final 58 concerns is shown in the Adult Burns Patients Concerns Inventory (Appendix 6).

## Discussion

The Adult Burns Patient Concerns Inventory is a 58-item prompt list that empowers patients to raise issues that are of greatest concern to them, which facilitates care providers to focus on these patient priorities. This study has captured the most important concerns experienced during recovery as perceived by patients and healthcare professionals, providing a tool that has shown to improve communication between patients and healthcare professionals in other healthcare settings, and has similar potential in the context of burn care.

In addition to the development of a new tool, this study has identified a number of other key findings. There was substantial overlap between the concerns raised by staff and patients. However, there were also notable differences. Staff raised issues and selected items that were more clinically driven whereas patients raised and selected issues that had an influence on their daily lives. Each source of content provided unique issues. Skin strength, infection, medication, dental health, acceptance and driving were concerns unique to the patient participants. On the other hand, scar characteristics, religion, personality, dry skin, contractures, friend's response and family's response were unique to HRQoL tools and the MDT. The importance of capturing concerns from both sides of the clinical consultation are demonstrated in the final PCI; five of these concerns appear on the PCI. This study has demonstrated that burns patients experience a wide range of concerns relating to their physical and functional well-being. Concerns raised by the majority of patients such as pain, itch, sleep, and increased sensitivity are well described in the literature<sup>4 32-37</sup>. Concerns that were less prevalent however, are not well described. Dental health for instance, a concern for two individuals, is absent in the burns literature.

All patients raised concerns about scarring that impacted upon all four domains of the PCI. The physical appearance of scars, such as colour and texture, were considered important during development of the POSAS HRQoL tool<sup>28</sup> and therefore included during content generation, but patients in our study were more concerned about the overall appearance and functional limitations associated with scarring, and scar features were not retained during the Delphi exercise. This is consistent with findings from the PEGASUS qualitative study where patients also focused on the general appearance of scars<sup>38</sup>. Our findings may indicate that the detailed characteristics of scars may be important when assessing the efficacy of clinical interventions, but are not of specific concern to patients. Scar characteristics were however deemed important in a study, performed by Kool et al.<sup>39</sup>. The mixed method study aimed to

1  
2  
3 determine a hierarchical structure of HRQoL domains identified from a cohort of adult burns  
4 patients. The differences in these findings could be attributed to a different study population  
5 or the sample size in this present study. The discrepancies highlight the heterogeneity of  
6 concerns within the adult burns population and the need to hear each patient's voice.  
7  
8  
9

10 The psychological, emotional and spiritual well-being domain contains more items than any  
11 other in the PCI. Many patients described these concerns as having greater and longer lasting  
12 impact than any other aspect of their injury and the central theme related to body image.  
13 Persistent psychological symptoms, such as flashbacks and fear avoidance, relating to the  
14 injury event were also prevalent. Patients in this study were not assessed for Post-Traumatic  
15 Stress Disorder (PTSD) but their psychological concerns may align with the symptomatic  
16 profile of PTSD, which emphasises cognitive features such as the negative appraisal of  
17 traumatic events and its central role in the maintenance of psychological distress<sup>40 41</sup>. Many  
18 patients described their scarring as a constant reminder of their injury, which supports the  
19 growing evidence that appearance distress and PTSD symptomology are interlinked in  
20 patients with visible disfigurement<sup>42</sup>. Psychological interventions aimed at addressing PTSD  
21 symptoms therefore need to simultaneously identify and address concerns relating to body  
22 image.  
23  
24  
25  
26  
27  
28  
29  
30  
31  
32  
33

34 Stigma associated with mental health disorders is associated with poor self-esteem, self-  
35 confidence and reluctance to seek care<sup>43 44</sup>. Patients in our study were also concerned about  
36 the negative connotations and potential stigmatisation associated with mental health support.  
37 Further work is required to identify patient friendly terminology for psychological support  
38 and to address the stigma associated with mental health disorders in the burns population.  
39  
40  
41  
42  
43

44 Concerns identified for the domain of social care and social well-being were more consistent  
45 across the three sources used for content generation compared to the other PCI domains. The  
46 importance of social support for improving outcomes for burn survivors is well established<sup>45</sup>  
47<sup>46</sup> but less is known about the impact on families. All patients were concerned about  
48 significant psychological distress observed in spouses, family and friends, following the burn  
49 trauma, many of whom had witnessed the injury. This is consistent with evidence from one  
50 study that reported clinical anxiety, depression or PTSD-related symptoms in 77% of spouses  
51 and 56% of close relatives immediately following injury<sup>45</sup>. However, the study did not  
52 include long-term follow-up of relatives, therefore the long-term trajectory of psychological  
53 distress in relatives and its relationship to the long term psychological state of the patient  
54  
55  
56  
57  
58  
59  
60

1  
2  
3 remain unclear. Psychological support for family members was the only aspect of care that  
4 patients felt was missing. Further research is needed on the prevalence of mental health  
5 conditions in family members and its impact on survivor recovery. Treatment-related  
6 concerns tended to focus on burden, such as the number of appointments, number of  
7 operations, the number of prescribed medicines and their side effects, the impact of treatment  
8 on the family (such as childcare), time off work and the financial cost of attending  
9 appointments. The majority of patients accepted the necessity of treatment for their recovery.  
10 However, patients with extensive injuries were concerned about the impact of treatment in  
11 delaying reintegration into society. This is consistent with the significant impact of treatment  
12 burden reported in a recent qualitative study<sup>38</sup>, but further research is required to explore this  
13 in further detail.  
14  
15  
16  
17  
18  
19  
20  
21  
22

23 There is significant overlap with the findings of this study and those reported by Kool et al  
24 indicating the validity of the findings<sup>39</sup>. The study identified two key distinctions in HRQoL,  
25 resilience and vulnerability. Vulnerability included five domains; psychological, economic,  
26 social, physical and intimate/sexual. Resilience incorporated positive coping and social  
27 sharing.  
28  
29  
30  
31

32 Similar to our study, functional limitations and issues with scarring were the predominant  
33 aspects of the physical domain. Likewise, negative emotions, body perception and trauma  
34 related symptoms, cognitive problems were central to the psychological domain. Social  
35 aspects such as intimacy, finance and work were also predominant. Unique issues such as  
36 medication, their side effects and aspects relating to treatment burden were also considered  
37 important by participants. As described above, discrepancies between the two studies were  
38 observed with the physical characteristics with scarring, which indicate the importance of  
39 assessing the needs of patients on an individual basis.  
40  
41  
42  
43  
44  
45  
46

47 The greatest potential limitation of this study, and similar HNA and HRQoL tools, is  
48 representativeness of the sampled patient population<sup>20</sup>. Whilst the purposive sampling  
49 strategy aimed to capture the underlying population, it did not cover the full demographic or  
50 clinical spectrum. Notably: all of the participants were white British, non-English speaking  
51 patients were excluded, and the age range did not include younger (under 28) and older (over  
52 60) patients. In addition, less common injuries such as frostbite were not included in the  
53 injury profile. It is therefore possible that the PCI does not capture concerns unique to  
54 patients from other cultures, age groups, or those with other types of burns. Once feasibility  
55  
56  
57  
58  
59  
60

1  
2  
3 and acceptability of the Adult Burn PCI has been established, further validation work will  
4 help to establish its relevance for other populations not included in this study – and perhaps a  
5 version ‘two- point-zero’ in years hence along similar lines to the progression of other  
6 patient-centric tools including POSAS <sup>28</sup>.  
7  
8  
9

10  
11 A further limitation of the Adult Burn PCI is the use of single words (e.g. Itch) or short  
12 phrases (e.g. Loss of functioning). Whilst this facilitates inclusion of a broad range of  
13 concerns without over-burdening patients, the selected terms may not fully encapsulate the  
14 specifics of the issue that the patient wishes to talk about. However, the addition of a free text  
15 option allows patients to raise additional concerns and this information could be used to  
16 further refine the content.  
17  
18  
19  
20  
21

22 The next stage of validation for the Adult Burn PCI is to determine the feasibility and  
23 acceptability of the tool in a clinical setting and to optimise the mode of administration, for  
24 example paper and pencil, portable devices such as smartphones and internet-based platforms  
25 <sup>11 47</sup>. Once feasibility has been established, a comparative study is required to determine  
26 whether the PCI improves patient/consultant communication and clinical outcomes compared  
27 to standard practice.  
28  
29  
30  
31  
32

### 33 **Conclusions**

34  
35 We have developed the Adult Patient Concerns Inventory for Burns (PCI-B). Through this  
36 process, we believe burns survivors will be empowered to guide clinicians towards their most  
37 pressing needs, and to better navigate the numerous potential problems they encounter. The  
38 PCI-B as published in this paper can be freely used and re-branded so long as the content is  
39 not altered and the acknowledgements are retained.  
40  
41  
42  
43  
44

### 45 **Acknowledgements**

46  
47 We would like to thank all patients and staff from the Mersey Regional Burns Centre,  
48 Whiston Hospital and subsequently The Welsh Centre for Burns and Plastic Surgery,  
49 Morryston Hospital for their participation in the study. We would like to thank Miss Bethan  
50 Hughes, RuthAnn Fanstone and Ezinna Rospigliosi of the Katie Piper Foundation for their  
51 invaluable input into the early stages of the PCI development. We would like to acknowledge  
52 and thank the Katie Piper Foundation for part-funding the study.  
53  
54  
55  
56  
57  
58

### 59 **Funding Statement:**

1  
2  
3 This work was supported by The Katie Piper Foundation.  
4  
5

6 **Competing Interests Statement:**  
7

8 The authors declare no conflicts of interest.  
9

10 **Authors Contribution**  
11

12  
13 **JAGG** - Designed the study, conducted and analysed the literature review, patient interviews  
14 and the Delphi process. JAGG also wrote the early draft of the manuscript.  
15

16  
17 **JY** – Contributed relevant clinical evidence (burns Surgery) and assisted with patient  
18 recruitment.  
19

20  
21 **LB**- Contributed relevant clinical evidence (burns nursing) and assisted with patient  
22 recruitment.  
23

24  
25 **JE** - Contributed relevant clinical evidence (burns Occupational Therapy) and assisted with  
26 patient recruitment.  
27

28  
29 **SS** – Assisted JAGG with study design, independently conducted data analysis and assisted  
30 with supervised manuscript preparation.  
31

32  
33 **SR** – Conceived the initial PCI and provided extensive support for study design.  
34

35  
36 **KS** - Conceived the idea of a Burns-PCI and presented the idea, encouraged JAGG  
37 to investigate the presented idea, applied for and acquired funding for this research  
38 and contributed relevant clinical evidence (burns surgery). The majority of patients  
39 involved in the study were under the care of KS, whom afforded access to and  
40 assisted with patient recruitment, supervised manuscript preparation and editing,  
41 responses to peer-review comments, and final proof-reading of the manuscript. All  
42 authors discussed the results, provided a critical appraisal and contributed to the final  
43 manuscript.  
44  
45  
46  
47  
48  
49  
50  
51  
52  
53  
54  
55  
56  
57  
58  
59  
60



All authors discussed the results, provided a critical appraisal and contributed to the final manuscript.

## References

1. World Health Organisation. Global Burden of Disease. Switzerland: World Health Organization Press 2004:1-160.
2. World Health O. WHO | Burns: World Health Organization, 2017.
3. Gibson JAG, Spencer S, Rogers SN, et al. Formulating a Patient Concerns Inventory specific to adult burns patients: learning from the PCI concept in other specialties. *Scars, Burns & Healing* 2018;4:2059513118763382. doi: 10.1177/2059513118763382
4. Stavrou D, Weissman O, Tessone A, et al. Health Related Quality of Life in burn patients - A review of the literature. *Burns* 2014;40(5):788-96. doi: <http://dx.doi.org/10.1016/j.burns.2013.11.014>
5. Van Loey NE, Van Son MJ. Psychopathology and psychological problems in patients with burn scars: epidemiology and management. *American journal of clinical dermatology* 2003;4(4):245-72. doi: 444 [pii]
6. Connell KM, Phillips M, Coates R, et al. Sexuality, body image and relationships following burns: analysis of BSHS-B outcome measures. *Burns* 2014;40(7):1329-37. doi: <https://dx.doi.org/10.1016/j.burns.2014.01.006>
7. Piccolo MS, Gragnani A, Daher RP, et al. Burn Sexuality Questionnaire: Brazilian translation, validation and cultural adaptation. *Burns* 2013;39(5):942-9. doi: <https://dx.doi.org/10.1016/j.burns.2012.10.012>
8. Greenfield S, Kaplan SH, Ware JE, Jr., et al. Patients' participation in medical care: effects on blood sugar control and quality of life in diabetes. *Journal of General Internal Medicine* 1988;3(5):448-57. [published Online First: 1988/09/01]
9. Griffin SJ, Kinmonth AL, Veltman MW, et al. Effect on health-related outcomes of interventions to alter the interaction between patients and practitioners: a systematic review of trials. *Annals of family medicine* 2004;2(6):595-608. doi: 10.1370/afm.142 [published Online First: 2004/12/04]
10. Coulter A, Collins A. Making Shared Decision Making a Reality: No decision about me, without me. London: The King's Fund 2011.
11. Rogers SN, El-Sheikha J, Lowe D. The development of a Patients Concerns Inventory (PCI) to help reveal patients concerns in the head and neck clinic. *Oral Oncol* 2009;45(7):555-61. doi: 10.1016/j.oraloncology.2008.09.004
12. Ahmed A, Rogers S, Bruce H, et al. Development of a rheumatology-specific patient concerns inventory (PCI) and its use in the rheumatology outpatient clinic setting. *Annals of the Rheumatic Diseases* 2015;74(4):315-16.
13. Rooney AG, Netten A, McNamara S, et al. Assessment of a brain-tumour-specific Patient Concerns Inventory in the neuro-oncology clinic. *Supportive care in cancer : official journal of the Multinational Association of Supportive Care in Cancer* 2014;22(4):1059-69. doi: 10.1007/s00520-013-2058-2 [doi]
14. Kanatas A, Lowe D, Velikova G, et al. Issues patients would like to discuss at their review consultation in breast cancer clinics - A cross-sectional survey. *Tumori* 2014;100(5):568-79.
15. 10.1111%2Fj.1524 4725.2006.32169.x.



16. Ahmed AE, Lowe D, Kirton JA, et al. Development of a Rheumatology-specific Patient Concerns Inventory and Its Use in the Rheumatology Outpatient Clinic Setting. *The Journal of rheumatology* 2016;43(4):779-87. doi: <https://dx.doi.org/10.3899/jrheum.150068>
17. Ghazali N, Roe B, Lowe D, et al. Patients concerns inventory highlights perceived needs and concerns in head and neck cancer survivors and its impact on health-related quality of life. *The British journal of oral & maxillofacial surgery* 2015;53(4):371-9. doi: <https://dx.doi.org/10.1016/j.bjoms.2015.01.022>
18. Aaronson N, Alonso J, Burnam A, et al. Assessing health status and quality-of-life instruments: attributes and review criteria. *Qual Life Res* 2002;11(3):193-205. [published Online First: 2002/06/21]
19. Cano SJ, Browne JP, Lamping DL. Patient-based measures of outcome in plastic surgery: current approaches and future directions. *British Journal of Plastic Surgery* 2004;57(1):1-11.
20. Cano SJ, Hobart JC. The problem with health measurement. *Patient preference and adherence* 2011;5():279-90. doi: 10.2147/PPA.S14399
21. Braun V, Clarke V. Using thematic analysis in psychology. *Qualitative Research in Psychology* 2006;3(2):77-101. doi: 10.1191/1478088706qp063oa
22. Brod M, Tesler LE, Christensen TL. Qualitative research and content validity: developing best practices based on science and experience. *Qual Life Res* 2009;18(9):1263-78. doi: 10.1007/s11136-009-9540-9 [published Online First: 2009/09/29]
23. SurveyMonkey. SurveyMonkey n.d [Available from: [www.surveymonkey.com](http://www.surveymonkey.com) accessed 19th September 2016.
24. Griffiths C, Guest E, White P, et al. A Systematic Review of Patient-Reported Outcome Measures Used in Adult Burn Research. *Journal of Burn Care & Research: Official Publication of the American Burn Association* 2017;38(2):521-45. doi: 10.1097/BCR.0000000000000474
25. Kildal M, Andersson G, Fugl-Meyer A, et al. Development of a brief version of the Burn Specific Health Scale (BSHS-B). 2001;51(4):740-6.
26. Ryan CM, Schneider JC, Kazis LE, et al. Benchmarks for multidimensional recovery after burn injury in young adults: The development, validation, and testing of the american burn association/shriners hospitals for children young adult burn outcome questionnaire. *Journal of Burn Care and Research* 2013;34(3):e121-e42. doi: <http://dx.doi.org/10.1097/BCR.0b013e31827e7ecf>
27. Taal LA, Faber AW. The burn specific pain anxiety scale: introduction of a reliable and valid measure. *Burns* 1997;23(2):147-50. [published Online First: 1997/03/01]
28. Draaijers LJ, Tempelman FRH, Botman YAM, et al. The patient and observer scar assessment scale: a reliable and feasible tool for scar evaluation. *Plastic and Reconstructive Surgery* 2004;113(7):1967.
29. Lawrence JW, Heinberg LJ, Roca R, et al. Development and validation of the Satisfaction With Appearance Scale: Assessing body image among burn-injured patients. *Psychological Assessment* 1998;10(1):64-70. doi: 10.1037/1040-3590.10.1.64
30. EuroQol. EuroQol - a new facility for the measurement of health-related quality of life. *Health policy* 1990;16(3):199-208. doi: 10.1016/0168-8510(90)90421-9
31. Ware JE, Jr., Sherbourne CD. The MOS 36-item short-form health survey (SF-36). I. Conceptual framework and item selection. *Med Care* 1992;30(6):473-83.
32. Anzarut A, Chen M, Shankowsky H, et al. Quality-of-life and outcome predictors following massive burn injury. *Plast Reconstr Surg* 2005;116(3):791-7. [published Online First: 2005/09/06]

- 1
- 2
- 3
- 4 33. Pan R, Egberts MR, Nascimento LC, et al. Health-Related Quality of Life in adolescent
- 5 survivors of burns: Agreement on self-reported and mothers' and fathers' perspectives.
- 6 *Burns* 2015;41(5):1107-13. doi: <https://dx.doi.org/10.1016/j.burns.2014.12.011>
- 7 34. van Laarhoven AI, Ulrich DJ, Wilder-Smith OH, et al. Psychophysiological Processing of
- 8 Itch in Patients with Chronic Post-burn Itch: An Exploratory Study. *Acta Derm*
- 9 *Venereol* 2016;96(5):613-8. doi: <https://dx.doi.org/10.2340/00015555-2323>
- 10 35. Van Loey N, Bremer M, Faber AW, et al. Itching following burns: epidemiology and
- 11 predictors. *British Journal of Dermatology* 2008;158(1):95-100. doi:
- 12 doi:10.1111/j.1365-2133.2007.08278.x
- 13 36. Van Loey NE, Faber AW, Taal LA. Do burn patients need burn specific multidisciplinary
- 14 outpatient aftercare: research results. *Burns* 2001;27(2):103-10.
- 15 37. van Loey NE, van Beeck EF, Faber BW, et al. Health-related quality of life after burns: a
- 16 prospective multicenter cohort study with 18 months follow-up. *J Trauma Acute Care*
- 17 *Surg* 2012;72(2):513-20.
- 18 38. Jones LL, Calvert M, Moiemmen N, et al. Outcomes important to burns patients during scar
- 19 management and how they compare to the concepts captured in burn-specific patient
- 20 reported outcome measures. *Burns* 2017;43(8):1682-92. doi:
- 21 10.1016/j.burns.2017.09.004
- 22 39. Kool MB, Geenen R, Egberts MR, et al. Patients' perspectives on quality of life after
- 23 burn. *Burns* 2017;43(4):747-56. doi: <https://doi.org/10.1016/j.burns.2016.11.016>
- 24 40. Brewin CR, Holmes EA. Psychological theories of posttraumatic stress disorder. *Clinical*
- 25 *Psychol Review* 2003;23(3):339-76. [published Online First: 2003/05/06]
- 26 41. Ehlers A, Clark DM. A cognitive model of posttraumatic stress disorder. *Behaviour*
- 27 *research and therapy* 2000;38(4):319-45. [published Online First: 2000/04/13]
- 28 42. Macleod R, Shepherd L, Thompson AR. Posttraumatic stress symptomatology and
- 29 appearance distress following burn injury: An interpretative phenomenological
- 30 analysis. *Health Psychol* 2016;35(11):1197-204. doi: 10.1037/hea0000391 [published
- 31 Online First: 2016/10/18]
- 32 43. Sartorius N. Stigma and mental health. *The Lancet* 2007;370(9590):810-11. doi:
- 33 10.1016/S0140-6736(07)61245-8
- 34 44. Corrigan P. How stigma interferes with mental health care. *American Psychologist*
- 35 2004;59(7):614-25. doi: 10.1037/0003-066X.59.7.614
- 36 45. Bond S, Gourlay C, Desjardins A, et al. Anxiety, depression and PTSD-related symptoms
- 37 in spouses and close relatives of burn survivors: When the supporter needs to be
- 38 supported. *Burns* 2017;43(3):592-601. doi: 10.1016/j.burns.2016.09.025 [published
- 39 Online First: 2016/10/21]
- 40 46. Badger K, Royse D. Helping others heal: burn survivors and peer support. *Soc Work*
- 41 *Health Care* 2010;49(1):1-18. doi: 10.1080/00981380903157963 [published Online
- 42 First: 2010/01/16]
- 43 47. Rogers SN, Lowe D. An evaluation of the Head and Neck Cancer Patient Concerns
- 44 Inventory across the Merseyside and Cheshire Network. *British Journal of Oral and*
- 45 *Maxillofacial Surgery* 2014;52(7):615-23.
- 46
- 47
- 48
- 49
- 50
- 51
- 52
- 53
- 54
- 55
- 56
- 57
- 58
- 59
- 60

1  
2  
3  
4  
5  
6  
7  
8  
9  
10  
11  
12  
13  
14  
15  
16  
17  
18  
19  
20  
21  
22  
23  
24  
25  
26  
27  
28  
29  
30  
31  
32  
33  
34  
35  
36  
37  
38  
39  
40  
41  
42  
43  
44  
45  
46  
47  
48  
49  
50  
51  
52  
53  
54  
55  
56  
57  
58  
59  
60

**Figure Legend**

**Figure 1 – An overview of study design**

For peer review only



Figure 1 An overview of study design

190x275mm (96 x 96 DPI)

## **Appendix**

### **Appendix 1 – search strategy for HRQoL tools**

A structured review of the literature was performed in November 2017 to identify current HNA, HRQoL tools and PROMs used in clinical practice and research within the burn population. To meet the objectives of the literature review, articles related to HRQoL assessment and articles outlining the original development of the tool were selected.

#### **Search terms**

# 1 Medical Subject Heading (MeSH) Burns – explode all trees.

# 2 Keyword Burn\*.

# 3 Keyword Thermal Injury\*

# 4 Keyword Holistic Need\*s Assessment\*.

# 5 Keyword Prompt list\*.

# 6 MeSH term Survey and Questionnaires explode all trees.

# 7 MeSH term Health Service Needs – explode all trees.

# 8 Keyword – unmet need\*.

# 9 OR #4 OR #5 OR #6 OR #7 OR #8

# 10 #1 OR #2 OR #3.

#11 #9 AND #10

#### **Inclusion Criteria**

- The tool must be utilised in an adult, burn population. With an adult defined as greater than 18 years of age, as this is when patients enter the adult health services. As the Burns PCI is intended for adults, paediatric tools were deemed irrelevant.
- Tool is patient reported. The aim of the Burns PCI is to prospectively identify patients' concerns, thus healthcare reported tools are irrelevant.

## Exclusion Criteria

- Articles using instruments that were not patient reported (e.g. family member, carer or clinician). As the PCI aims to capture the concerns and issues of patients, tools capturing content from family members, carers or healthcare professionals were deemed irrelevant.
- Articles using generic PROMs that focus on one symptom (e.g. pain). A generic tool being defined as an instrument intended for use in general populations or across a wide range of disease conditions but not specifically to burns patients (Fayers and Machin, 2007). Whilst a number of such tools utilised in adult burn care research (Griffiths et al., 2017), it was believed that such tools mainly focused on assessing the severity of symptoms that were not directly derived from the burn population.
- Articles reporting data/utilising a tool from the paediatric population.
- Articles outlining the cultural validation of HRQoL tools were excluded.
- PROMs and HRQoL tools must have psychometric evidence confirming their reliability, validity and responsiveness; an essential criteria of a HRQoL tool (Aaronson et al., 2002).

## **Appendix 2 – Interview Questions**

### **Introduction**

Explain my experience as patient and doctor.

Explain the rationale behind the study providing an example of the H&N PCI to illustrate the intended purpose

Gain informed consent

Start Recording

### **Background information**

Age:

Occupation:

Region:

Living arrangements:

Date of Injury:

### **Injury**

Can you tell more about your injury?

Were you admitted to the hospital?

What aspects of your injury, either now, in the past or in the future concern you?

What aspects of your treatment, either now, in the past or in the future concern you?

What aspects of your injury or treatment or are important to you, either now, in the past or in the future?

Is this something that you might want to talk to your doctor or other healthcare professional about?

### **Close**

Thank the patient for their time. Explain the next stage of the study – the Delphi and provide PIS. Take email address if patient is willing

**Appendix 3 – List of Concerns Extracted from HRQoL tools.**

| HRQoL Tool           | Domains of the Tool                                                                                                                                                                                | Content Extracted                                                                                                                                                                                                                   |
|----------------------|----------------------------------------------------------------------------------------------------------------------------------------------------------------------------------------------------|-------------------------------------------------------------------------------------------------------------------------------------------------------------------------------------------------------------------------------------|
| BSHS-B <sup>25</sup> | Simple abilities, heat sensitivity, hand function, treatment regimen, work, body image, affect, interpersonal relationships and sexuality.                                                         | Heat sensitivity, skin sensitivity, loneliness, low mood, hand function, work, day to day, sex, family, emotions, appearance, wounds, self-care, daily activities, social interactions, dressings, acceptance, scars and anxiety.   |
| YABOQ <sup>26</sup>  | Itch, family function, satisfaction with role, family concerns, pain satisfaction with symptoms, appearance, fine motor, social function, social function limited by appearance, sex and religion. | Itch, pain, mobility, hand function, hobbies/interests, appearance, peoples' perceptions, frustration, sex, anger, family, appetite, the future, sleep, work, study, religion, relationships, food, scars, uncertainty and anxiety. |
| BSPAS <sup>27</sup>  | N/A – Symptom specific.                                                                                                                                                                            | Wound healing, anxiety, dressing changes, pain, treatment, coping and surgery.                                                                                                                                                      |
| POSAS <sup>28</sup>  | N/A Symptom specific.                                                                                                                                                                              | Scar shape, scar size, scar texture, pain and itch.                                                                                                                                                                                 |
| SWAP <sup>29</sup>   | N/A Symptom specific.                                                                                                                                                                              | Family, people's perception, relationships, appearance, intimacy, friends, acceptance.                                                                                                                                              |
| ED5Q <sup>30</sup>   | Mobility, self-care, usual activities, pain/discomfort and anxiety and depression.                                                                                                                 | Mobility, Self-Care, Day to day activities, hand function, pain, anxiety and depression.                                                                                                                                            |
| SF36 <sup>31</sup>   | Physical functioning, role-physical, bodily pain, general health, vitality, social functioning, role-emotional and mental health                                                                   | Interest/hobbies, mobility, hand function, self-care, energy, fatigue, friends, family, relationships, pain, anxiety, exercise and concentration.                                                                                   |



**Appendix 4 Content generated from the MDT.**

| <b>Professional</b>              | <b>Number</b> | <b>Items Added</b>                                                                                                                                                                                                                                                                                                                                                                                                                                     |
|----------------------------------|---------------|--------------------------------------------------------------------------------------------------------------------------------------------------------------------------------------------------------------------------------------------------------------------------------------------------------------------------------------------------------------------------------------------------------------------------------------------------------|
| Consultant Burns Surgeon         | 3             | Camouflagability<br>Guilt<br>Blame<br>Stigma<br>weight                                                                                                                                                                                                                                                                                                                                                                                                 |
| Consultant Anaesthetist          | 2             | Toileting<br>Chronic pain<br>Neuropathic pain                                                                                                                                                                                                                                                                                                                                                                                                          |
| Consultant Clinical Psychologist | 3             | Drug and alcohol use<br>Flashbacks<br>Withdrawal from usual activities<br>/Isolating self<br>Staring<br>Function generally<br>Pain generally<br>Nightmares<br>Intrusive thoughts or images<br>Guilt<br>Embarrassment<br>Avoidance of reminders of<br>accident/injury<br>Comments and questions from others<br>Contractures<br>Frustration<br>Hypervigilance – increased awareness<br>of danger<br>Inability to do certain tasks<br>Loss of functioning |
| Physiotherapist                  | 3             | Function<br>Normality<br>Therapy<br>Touch<br>Confidence<br>Ownership<br>Responsibility<br>Time<br>Enjoyment<br>Fear<br>Future<br>Confusion                                                                                                                                                                                                                                                                                                             |
| Occupational Therapist           | 2             | Compliance                                                                                                                                                                                                                                                                                                                                                                                                                                             |
| Staff Nurse                      | 4             | Reconstruction<br>Exclusion<br>Future – what does it hold?<br>Future – fear<br>Isolation<br>Why me?                                                                                                                                                                                                                                                                                                                                                    |

|  |  |                                                                                                                                                                     |
|--|--|---------------------------------------------------------------------------------------------------------------------------------------------------------------------|
|  |  | Family's response<br>Family support<br>Friend's response<br>Guilt<br>Further surgery<br>What now?<br>Dry skin<br>I'm ugly<br>They're ugly (scars)<br>This is me now |
|--|--|---------------------------------------------------------------------------------------------------------------------------------------------------------------------|

### Appendix 5- List of the total number of items identified

| HRQoL tools           | Patients           | Staff                                          |
|-----------------------|--------------------|------------------------------------------------|
| Acceptance            | Acceptance         | Avoidance of reminders of accident/injury      |
| Anger                 | Alcohol            | blame                                          |
| Anxiety               | Anger              | Camouflagability                               |
| Appearance            | Anxiety            | Chronic pain                                   |
| Appetite              | Appetite           | Comments and questions from others             |
| Concentration         | Avoidance          | Compliance                                     |
| Coping                | Body image         | Confidence                                     |
| Daily activities      | Bullying           | Confusion                                      |
| Day to day activities | Burning pain       | Contractures                                   |
| Depression            | Camouflage         | Dry skin                                       |
| Dressings             | Chronic pain       | emotion                                        |
| Emotions              | Coping             | Enjoyment                                      |
| Energy                | Creams             | Exclusion                                      |
| Exercise              | Daily living       | Exercise                                       |
| Family                | Depression         | Family's response                              |
| Family                | Dressing changes   | flashbacks                                     |
| Fatigue               | Driving            | Friend's response                              |
| Food                  | Family             | Frustration                                    |
| Friends               | Family Support     | Function                                       |
| Frustration           | Fatigue            | Further surgery                                |
| Hand function         | Fear               | Future – fear                                  |
| Heat sensitivity      | Finance            | Future – what does it hold?                    |
| Hobbies/interests     | Flashbacks         | GP                                             |
| Interest/hobbies      | Guilt              | Guilt                                          |
| Intimacy              | Hair               | Hyperalgesia/increased sensitivity to pain     |
| Itch                  | Hand function      | Hypervigilance – increased awareness of danger |
| Loneliness            | Heat sensitivity   | I'm ugly                                       |
| Low mood              | Hobbies            | Inability to do certain tasks                  |
| Mobility              | Infection          | information                                    |
| Pain                  | Information        | Isolation                                      |
| Peoples' perceptions  | Intimacy           | Loss of functioning                            |
| Relationships         | Itch               | Neuropathic pain                               |
| Religion              | Legal Implications | Normal                                         |

|    |                       |                      |                      |
|----|-----------------------|----------------------|----------------------|
| 1  |                       |                      |                      |
| 2  |                       |                      |                      |
| 3  | Scar Shape            | Low mood             | Normality            |
| 4  | Scar size             | Medication           | Online information   |
| 5  | Scar texture          | Mobility             | Ownership            |
| 6  | Scars                 | Nerve pain           | personality          |
| 7  | Self care             | Pain                 | Reconstruction       |
| 8  | Sex                   | People's perception  | Responsibility       |
| 9  | Sex                   | People's perception  | Responsibility       |
| 10 | Sex                   | People's perception  | Responsibility       |
| 11 | Skin sensitivity      | Personal care        | splints              |
| 12 | Sleep                 | Pregnancy            | Stigma               |
| 13 | Social interactions   | Pressure Garment     | stress               |
| 14 | Study                 | Psychological Trauma | Support groups       |
| 15 | Support for my family | Relationships        | Therapy              |
| 16 | Support for my family | Relationships        | Therapy              |
| 17 | Surgery               | Scarring             | They're ugly (scars) |
| 18 | The future            | Self-Esteem          | This is me now       |
| 19 | Uncertainty           | Skin sensitivity     | Time                 |
| 20 | Uncertainty           | Skin sensitivity     | Time                 |
| 21 | Work                  | Skin strength        | To be touched        |
| 22 | Wound healing         | Sleep                | Toileting            |
| 23 | Wounds                | Smoking              | Touch                |
| 24 | Wounds                | Splint               | weight               |
| 25 |                       | Tightness            | What now?            |
| 26 |                       | Travel               | Why me?              |
| 27 |                       | Treatment            |                      |
| 28 |                       | Weight               |                      |
| 29 |                       | Work and education   |                      |
| 30 |                       | Wound care           |                      |
| 31 |                       |                      |                      |
| 32 |                       |                      |                      |
| 33 |                       |                      |                      |
| 34 |                       |                      |                      |
| 35 |                       |                      |                      |
| 36 |                       |                      |                      |
| 37 |                       |                      |                      |
| 38 |                       |                      |                      |
| 39 |                       |                      |                      |
| 40 |                       |                      |                      |
| 41 |                       |                      |                      |
| 42 |                       |                      |                      |
| 43 |                       |                      |                      |
| 44 |                       |                      |                      |
| 45 |                       |                      |                      |
| 46 |                       |                      |                      |
| 47 |                       |                      |                      |
| 48 |                       |                      |                      |
| 49 |                       |                      |                      |
| 50 |                       |                      |                      |
| 51 |                       |                      |                      |
| 52 |                       |                      |                      |
| 53 |                       |                      |                      |
| 54 |                       |                      |                      |
| 55 |                       |                      |                      |
| 56 |                       |                      |                      |
| 57 |                       |                      |                      |
| 58 |                       |                      |                      |
| 59 |                       |                      |                      |
| 60 |                       |                      |                      |

Appendix 6 – The completed PCI

Insert tailored branding for PCI users/Burns services here.

Adult Burns

## Patient Concerns Inventory [PCI]

Please choose from the list of issues you would specifically like to talk about in your consultation in clinic today. You can choose more than one option (tick boxes).

**Physical and functional well-being:**

- Contractures
- Daily Activities
- Dry Skin
- Energy
- Exercise
- Hand Function
- Heat Sensitivity
- Increased skin sensitivity
- Itch
- Loss of functioning
- Mobility
- Nerve Pain
- Pain
- Scarring
- Sleep
- Stiffness
- Tightness
- Weight

**Social Care and Social well-being:**

- Family/Support for my family
- Finance
- Friends
- Hobbies/Interests
- Legal implications of the accident/injury
- Personal Care
- Work/Education

**Psychological, emotional and spiritual well-being:**

- Acceptance
- Alcohol
- Anger
- Anxiety
- Appearance
- Body image
- Avoidance
- Comments and questions from others
- Concentration
- Confidence
- Coping
- Depression
- Emotions
- Flashbacks
- Increased awareness of danger
- Low mood
- Psychological Trauma
- Relationships
- Self esteem
- Sex
- Smoking
- The future

**Treatment related concerns:**

- Camouflage
- Dressing changes
- Infection
- GP
- Medication
- Ongoing wound/scar care
- Pressure Garments
- Reconstruction
- Splints
- Support groups
- Therapy

**Other (Please State):**

\_\_\_\_\_

\_\_\_\_\_

\_\_\_\_\_

\_\_\_\_\_

\_\_\_\_\_

Name:

Affix label here

1  
2  
3  
4  
5  
6  
7  
8  
9  
10  
11  
12  
13  
14  
15  
16  
17  
18  
19  
20  
21  
22  
23  
24  
25  
26  
27  
28  
29  
30  
31  
32  
33  
34  
35  
36  
37  
38  
39  
40  
41  
42  
43  
44  
45  
46  
47  
48  
49  
50  
51  
52  
53  
54  
55  
56  
57  
58  
59  
60

**Insert tailored branding for PCI users/Burns services here.**

The following page gives you the opportunity to highlight people you may wish to talk to. Are there any people you would specifically like to talk with either in clinic or by referral?

- Burns Surgeon
- Nursing Staff
- Specialist Nurse
- Psychologist
- Dietician
- Occupational Therapist
- Physiotherapist
- Other: .....

Thank you for your time. All information is confidential. We found PCI has helped patients express issues in their clinic. Please hand this is to clinic staff.

©The Burns PCI was developed in collaboration with Edge Hill University, The Mersey regional Burns Centre, The Welsh Centre for Burns, The Katie Piper Foundation and Aintree University Hospital

Name:

Affix label here
