# Supplementary material for: Identifying patient concerns during consultations in tertiary burns services: development of the Adult Burns Patient Concerns Inventory
Source: PubMed Central journal article supplement — BMJ Open. 2019 Dec 30;9(12):e032785. doi: 10.1136/bmjopen-2019-032785 (PMC6955499; doi:10.1136/bmjopen-2019-032785), 2019-12-30
Supplement: bmjopen-2019-032785supp001.pdf [file bmjopen-2019-032785supp001.pdf]

## **Appendix**

### **Appendix 1 – search strategy for HRQoL tools**

A structured review of the literature was performed in November 2017 to identify current HNA, HRQoL tools and PROMs used in clinical practice and research within the burn population. To meet the objectives of the literature review, articles related to HRQoL assessment and articles outlining the original development of the tool were selected.

#### **Search terms**

# 1 Medical Subject Heading (MeSH) Burns – explode all trees.

# 2 Keyword Burn\*.

# 3 Keyword Thermal Injury\*

# 4 Keyword Holistic Need\*s Assessment\*.

# 5 Keyword Prompt list\*.

# 6 MeSH term Survey and Questionnaires explode all trees.

# 7 MeSH term Health Service Needs – explode all trees.

# 8 Keyword – unmet need\*.

# 9 OR #4 OR #5 OR #6 OR #7 OR #8

# 10 #1 OR #2 OR #3.

#11 #9 AND #10

#### **Inclusion Criteria**

- The tool must be utilised in an adult, burn population. With an adult defined as greater than 18 years of age, as this is when patients enter the adult health services. As the Burns PCI is intended for adults, paediatric tools were deemed irrelevant.
- Tool is patient reported. The aim of the Burns PCI is to prospectively identify patients' concerns, thus healthcare reported tools are irrelevant.

## Exclusion Criteria

- Articles using instruments that were not patient reported (e.g. family member, carer or clinician). As the PCI aims to capture the concerns and issues of patients, tools capturing content from family members, carers or healthcare professionals were deemed irrelevant.
- Articles using generic PROMs that focus on one symptom (e.g. pain). A generic tool being defined as an instrument intended for use in general populations or across a wide range of disease conditions but not specifically to burns patients (Fayers and Machin, 2007). Whilst a number of such tools utilised in adult burn care research (Griffiths et al., 2017), it was believed that such tools mainly focused on assessing the severity of symptoms that were not directly derived from the burn population.
- Articles reporting data/utilising a tool from the paediatric population.
- Articles outlining the cultural validation of HRQoL tools were excluded.
- PROMs and HRQoL tools must have psychometric evidence confirming their reliability, validity and responsiveness; an essential criteria of a HRQoL tool (Aaronson et al., 2002).

## **Appendix 2 – Interview Questions**

### **Introduction**

Explain my experience as patient and doctor.

Explain the rationale behind the study providing an example of the H&N PCI to illustrate the intended purpose

Gain informed consent

Start Recording

### **Background information**

Age:

Occupation:

Region:

Living arrangements:

Date of Injury:

### **Injury**

Can you tell more about your injury?

Were you admitted to the hospital?

What aspects of your injury, either now, in the past or in the future concern you?

What aspects of your treatment, either now, in the past or in the future concern you?

What aspects of your injury or treatment or are important to you, either now, in the past or in the future?

Is this something that you might want to talk to your doctor or other healthcare professional about?

### **Close**

Thank the patient for their time. Explain the next stage of the study – the Delphi and provide PIS. Take email address if patient is willing

**Appendix 3 – List of Concerns Extracted from HRQoL tools.**

| <b>HRQoL Tool</b>    | <b>Domains of the Tool</b>                                                                                                                                                                         | <b>Content Extracted</b>                                                                                                                                                                                                            |
|----------------------|----------------------------------------------------------------------------------------------------------------------------------------------------------------------------------------------------|-------------------------------------------------------------------------------------------------------------------------------------------------------------------------------------------------------------------------------------|
| BSHS-B <sup>25</sup> | Simple abilities, heat sensitivity, hand function, treatment regimen, work, body image, affect, interpersonal relationships and sexuality.                                                         | Heat sensitivity, skin sensitivity, loneliness, low mood, hand function, work, day to day, sex, family, emotions, appearance, wounds, self-care, daily activities, social interactions, dressings, acceptance, scars and anxiety.   |
| YABOQ <sup>26</sup>  | Itch, family function, satisfaction with role, family concerns, pain satisfaction with symptoms, appearance, fine motor, social function, social function limited by appearance, sex and religion. | Itch, pain, mobility, hand function, hobbies/interests, appearance, peoples' perceptions, frustration, sex, anger, family, appetite, the future, sleep, work, study, religion, relationships, food, scars, uncertainty and anxiety. |
| BSPAS <sup>27</sup>  | N/A – Symptom specific.                                                                                                                                                                            | Wound healing, anxiety, dressing changes, pain, treatment, coping and surgery.                                                                                                                                                      |
| POSAS <sup>28</sup>  | N/A Symptom specific.                                                                                                                                                                              | Scar shape, scar size, scar texture, pain and itch.                                                                                                                                                                                 |
| SWAP <sup>29</sup>   | N/A Symptom specific.                                                                                                                                                                              | Family, people's perception, relationships, appearance, intimacy, friends, acceptance.                                                                                                                                              |
| ED5Q <sup>30</sup>   | Mobility, self-care, usual activities, pain/discomfort and anxiety and depression.                                                                                                                 | Mobility, Self-Care, Day to day activities, hand function, pain, anxiety and depression.                                                                                                                                            |
| SF36 <sup>31</sup>   | Physical functioning, role-physical, bodily pain, general health, vitality, social functioning, role-emotional and mental health                                                                   | Interest/hobbies, mobility, hand function, self-care, energy, fatigue, friends, family, relationships, pain, anxiety, exercise and concentration.                                                                                   |

**Appendix 4 Content generated from the MDT.**

| <b>Professional</b>              | <b>Number</b> | <b>Items Added</b>                                                                                                                                                                                                                                                                                                                                                                                                                                     |
|----------------------------------|---------------|--------------------------------------------------------------------------------------------------------------------------------------------------------------------------------------------------------------------------------------------------------------------------------------------------------------------------------------------------------------------------------------------------------------------------------------------------------|
| Consultant Burns Surgeon         | 3             | Camouflagability<br>Guilt<br>Blame<br>Stigma<br>weight                                                                                                                                                                                                                                                                                                                                                                                                 |
| Consultant Anaesthetist          | 2             | Toileting<br>Chronic pain<br>Neuropathic pain                                                                                                                                                                                                                                                                                                                                                                                                          |
| Consultant Clinical Psychologist | 3             | Drug and alcohol use<br>Flashbacks<br>Withdrawal from usual activities<br>/Isolating self<br>Staring<br>Function generally<br>Pain generally<br>Nightmares<br>Intrusive thoughts or images<br>Guilt<br>Embarrassment<br>Avoidance of reminders of<br>accident/injury<br>Comments and questions from others<br>Contractures<br>Frustration<br>Hypervigilance – increased awareness<br>of danger<br>Inability to do certain tasks<br>Loss of functioning |
| Physiotherapist                  | 3             | Function<br>Normality<br>Therapy<br>Touch<br>Confidence<br>Ownership<br>Responsibility<br>Time<br>Enjoyment<br>Fear<br>Future<br>Confusion                                                                                                                                                                                                                                                                                                             |
| Occupational Therapist           | 2             | Compliance                                                                                                                                                                                                                                                                                                                                                                                                                                             |
| Staff Nurse                      | 4             | Reconstruction<br>Exclusion<br>Future – what does it hold?<br>Future – fear<br>Isolation<br>Why me?                                                                                                                                                                                                                                                                                                                                                    |

|  |  |                                                                                                                                                                     |
|--|--|---------------------------------------------------------------------------------------------------------------------------------------------------------------------|
|  |  | Family's response<br>Family support<br>Friend's response<br>Guilt<br>Further surgery<br>What now?<br>Dry skin<br>I'm ugly<br>They're ugly (scars)<br>This is me now |
|--|--|---------------------------------------------------------------------------------------------------------------------------------------------------------------------|

### Appendix 5- List of the total number of items identified

| HRQoL tools           | Patients           | Staff                                          |
|-----------------------|--------------------|------------------------------------------------|
| Acceptance            | Acceptance         | Avoidance of reminders of accident/injury      |
| Anger                 | Alcohol            | blame                                          |
| Anxiety               | Anger              | Camouflagability                               |
| Appearance            | Anxiety            | Chronic pain                                   |
| Appetite              | Appetite           | Comments and questions from others             |
| Concentration         | Avoidance          | Compliance                                     |
| Coping                | Body image         | Confidence                                     |
| Daily activities      | Bullying           | Confusion                                      |
| Day to day activities | Burning pain       | Contractures                                   |
| Depression            | Camouflage         | Dry skin                                       |
| Dressings             | Chronic pain       | emotion                                        |
| Emotions              | Coping             | Enjoyment                                      |
| Energy                | Creams             | Exclusion                                      |
| Exercise              | Daily living       | Exercise                                       |
| Family                | Depression         | Family's response                              |
| Family                | Dressing changes   | flashbacks                                     |
| Fatigue               | Driving            | Friend's response                              |
| Food                  | Family             | Frustration                                    |
| Friends               | Family Support     | Function                                       |
| Frustration           | Fatigue            | Further surgery                                |
| Hand function         | Fear               | Future – fear                                  |
| Heat sensitivity      | Finance            | Future – what does it hold?                    |
| Hobbies/interests     | Flashbacks         | GP                                             |
| Interest/hobbies      | Guilt              | Guilt                                          |
| Intimacy              | Hair               | Hyperalgesia/increased sensitivity to pain     |
| Itch                  | Hand function      | Hypervigilance – increased awareness of danger |
| Loneliness            | Heat sensitivity   | I'm ugly                                       |
| Low mood              | Hobbies            | Inability to do certain tasks                  |
| Mobility              | Infection          | information                                    |
| Pain                  | Information        | Isolation                                      |
| Peoples' perceptions  | Intimacy           | Loss of functioning                            |
| Relationships         | Itch               | Neuropathic pain                               |
| Religion              | Legal Implications | Normal                                         |

|                       |                      |                      |
|-----------------------|----------------------|----------------------|
| Scar Shape            | Low mood             | Normality            |
| Scar size             | Medication           | Online information   |
| Scar texture          | Mobility             | Ownership            |
| Scars                 | Nerve pain           | personality          |
| Self care             | Pain                 | Reconstruction       |
| Sex                   | People's perception  | Responsibility       |
| Skin sensitivity      | Personal care        | splints              |
| Sleep                 | Pregnancy            | Stigma               |
| Social interactions   | Pressure Garment     | stress               |
| Study                 | Psychological Trauma | Support groups       |
| Support for my family | Relationships        | Therapy              |
| Surgery               | Scarring             | They're ugly (scars) |
| The future            | Self-Esteem          | This is me now       |
| Uncertainty           | Skin sensitivity     | Time                 |
| Work                  | Skin strength        | To be touched        |
| Wound healing         | Sleep                | Toileting            |
| Wounds                | Smoking              | Touch                |
|                       | Splint               | weight               |
|                       | Tightness            | What now?            |
|                       | Travel               | Why me?              |
|                       | Treatment            |                      |
|                       | Weight               |                      |
|                       | Work and education   |                      |
|                       | Wound care           |                      |
